# Supplementary material
Source: publisher figshare collection journal article supplement (https://springernature.figshare.com/ndownloader/files/17446685)
Supplement: Supplementary file [file 17446685]

# Equivalence Analysis of Pathogenesis-Based Transcript (PBT) Gene Lists

Supplementary materials to Sanchez-Pla, A., Salicru,  
M. and Ocaña, J. An equivalence approach to the  
integrative analysis of features lists. BMC  
Bioinformatics

Organ rejection diagnosis is mainly based on the study of tissue biopsies (e.g. renal, lung, heart or liver) but, unfortunately, the lesions observed by conventional histology are often not specific for the underlying mechanism since histological lesions (e.g., interstitial inflammation in renal biopsies) may be driven by different processes. The molecular mechanisms operating in human organ transplant rejection are best inferred from the mRNAs expressed in biopsies because the corresponding proteins often have low expression and short half-lives, while small non-coding RNAs lack specificity. The study of associations should be characterized in a population that rigorously identifies the different mechanism participating in organ rejection, that is, T cell-mediated and antibody-mediated rejection (TCMR and ABMR). Associations can be universal (both types of rejection), TCMR-selective, or ABMR-selective. It has been proposed that top universal transcripts are gamma-interferon inducible and transcripts shared by effector T cells and NK cells. TCMR-selective transcripts are expressed in activated effector T cells or gamma interferon-induced macrophages while ABMR-selective transcripts are expressed in NK cells and endothelial cells. Transcript associations are highly reproducible between biopsy sets when the same rejection definitions, algorithm, and technology are applied, but exact ranks will vary. Despite rejection-associated transcripts are never completely rejection-specific because they are shared with the stereotyped response-to-injury and innate immunity, transcriptomic analysis using pathogenesis-based transcripts contributes to a better characterization of mechanisms leading to organ dysfunction.

Many studies have been performed to identify sets of genes that can be associated with pathogenic processes that can lead to kidney failure. We work here with a list of gene lists generically described as “PBTs” (Pathogenic Based Transcript Sets) available at <https://www.ualberta.ca/medicine/institutes-centers-groups/atagc/research/gene-list> and as supplementary material<sup>1</sup>.

Each list consists in a series of probeset identifiers from `hgu133plus2` Affymetrix expression microarrays that have been selected in distinct studies. For this example the probesets have been preprocessed as follows:

- Affymetrix identifiers have been converted into **Entrez** identifiers with Biomart.
- When several probesets had the same identifier this appeared only once in the list.

Equivalence analysis of the resulting gene lists can be easily performed using functions in the `goProfiles` package. A “standard” analysis has been performed which consists of computing the dissimilarity matrix of equivalence thresholds and building a dendrogram (here using the maximum distance, or complete, method) for the three ontologies at levels 2 to 8. Provided the asymptotic nature of the tests considered here, only the five lists with almost 100 annotated genes

---

<sup>1</sup>Web pages may change and links become unavailable. To avoid these problems the datasets used in the examples have been downloaded from their public locations and added as supplementary materials

at the less restrictive GO level (level 2) have been included in the analysis. They are described in supplementary table 1 where, for each list, we provide its PBT abbreviation, the number of unique Entrez Ids and a short description.

Table 1: Kidney rejection after transplantation related gene lists.

| PBT    | Size | PBT Name                                     | Biological Description                                                               |
|--------|------|----------------------------------------------|--------------------------------------------------------------------------------------|
| ENDAT  | 114  | Endothelium-associated transcripts           | Microcirculation response to injury                                                  |
| IRITD3 | 313  | Injury- and repair-induced transcripts day 3 | Active injury-repair response: 'injury-up' Increased in isografts peaking day 3      |
| IRITD5 | 221  | Injury- and repair-induced transcripts day 5 | Active injury-repair response: 'injury-up' Increased in isografts peaking day 5      |
| KT1    | 574  | Kidney transcripts-set 1                     | Active injury-repair response: 'injury-down' Parenchymal transcripts                 |
| KT1.1  | 119  | Kidney transcripts - Set 1.1                 | Humanized mouse kidney selective transcripts reduced >90% in day 21 mouse allografts |

```

> library(goProfiles)
> load("pbtsGeneLists2.rda")
> sapply(pbtGeneLists2, length)

ENDAT IRITD3 IRITD5    KT1  KT1.1
  114    313    221    574    119

> # Genes in common to each pair of lists:
> lstNams <- names(pbtGeneLists2)
> for (i in 2:length(pbtGeneLists2)) {
+   for (j in 1:(i-1)) {
+     cat(lstNams[i], "&", lstNams[j],
+         length(intersect(pbtGeneLists2[[i]], pbtGeneLists2[[j]])),
+         "common genes of ", length(pbtGeneLists2[[i]]), length(pbtGeneLists2[[j]]),
+         "\n")
+   }
+ }

IRITD3 & ENDAT 7 common genes of 313 114
IRITD5 & ENDAT 4 common genes of 221 114
IRITD5 & IRITD3 4 common genes of 221 313
KT1 & ENDAT 9 common genes of 574 114
KT1 & IRITD3 0 common genes of 574 313

```

```

KT1 & IRITD5 1 common genes of 574 221
KT1.1 & ENDAT 0 common genes of 119 114
KT1.1 & IRITD3 0 common genes of 119 313
KT1.1 & IRITD5 0 common genes of 119 221
KT1.1 & KT1 109 common genes of 119 574

> # Number of annotated genes in each ontology and GO level:
> # (quite time consuming, to save time results are included below)
> # for (lev in 2:16) {
> #   cat("level ", lev, "\n")
> #   profsList <- lapply(pbtGeneLists2,
> #                       expandedProfile, level = lev, orgPackage = "org.Hs.eg.db")
> #   print(sapply(profsList, function(ontoProf){
> #     sapply(ontoProf, ngenes)
> #   }))
> # }
> # Equivalence analysis from GO levels 2 to 8 and for all ontologies:
> # (next sentence is considerably time consuming, to speed processing,
> # you may directly go to
> # load(file = "kidney_rejection_lists_ etc. uncomment, and run it)
>
> genListsClusters <- iterEquivClust(
+   pbtGeneLists2, ontoLevels = 2:8,
+   jobName = "kidney_rejection_gene_lists_equivalence_clustering_levels2to8",
+   ylab = "Equivalence threshold distance",
+   orgPackage="org.Hs.eg.db", method = "complete")

kidney_rejection_gene_lists_equivalence_clustering_levels2to8 Ontology BP at level 2

Building marginal profiles:

Building profile for list ENDAT
Building profile for list IRITD3
Building profile for list IRITD5
Building profile for list KT1
Building profile for list KT1.1

Building intersection profiles:

IRITD3,ENDAT |
IRITD5,ENDAT |IRITD5,IRITD3|
KT1 ,ENDAT |KT1 ,IRITD3|KT1 ,IRITD5|
KT1.1 ,ENDAT |KT1.1 ,IRITD3|KT1.1 ,IRITD5|KT1.1 ,KT1 |

Performing all equivalence tests:

```

```

IRITD3,ENDAT |
IRITD5,ENDAT |IRITD5,IRITD3|
KT1 ,ENDAT |KT1 ,IRITD3|KT1 ,IRITD5|
KT1.1 ,ENDAT |KT1.1 ,IRITD3|KT1.1 ,IRITD5|KT1.1 ,KT1 |

```

kidney\_rejection\_gene\_lists\_equivalence\_clustering\_levels2to8 Ontology BP at level 3

Building marginal profiles:

Etc. Truncated script output...

```

> save(genListsClusters,
+      file = paste0(attr(genListsClusters, "jobName"), ".rda", sep = ""))
> # load("kidney_rejection_gene_lists_equivalence_clustering_levels2to8.rda")
>
> # Generate a pdf file with all equivalence clusters:
> equivClust2pdf(genListsClusters,
+               jobName = "Kidney_rejection_gene_lists_Equivalence_method")

```

As can be seen in the plots, the end groupings share similar patterns for all ontologies and levels: Kidney transcripts by one side and endothelial and injury transcripts by the other, the later more similar to each other than to endothelial. These groupings are not surprising because each type of genes is involved in different biological processes but they suggest that groupings observed in other settings, where the relation between the lists is not obvious, can also be considered as reasonable.

Despite these general trends, there is some variability between the clusters obtained at different levels of the same ontology. In our opinion, a trade-off between the need for statistical validity vs the need for interesting biological information must be considered. Provided its asymptotic inferential character (that is to say, more sample size -i.e., more total annotation- would imply more reliability in the inferences), one may expect more stability in the results for large sample sizes. Total annotation may decline if we require more specificity to GO terms, if we go deep in the GO. On the other hand, more specificity provides more interesting biological information; at lower levels the GO terms under consideration may be too general. There is considerable stability with respect to the final groupings at intermediate GO levels, from 4 to 6. Not surprisingly, this stability is partially broken from level 7, specially for the MF ontology, where the total annotation number for lists ENDAT and KT1.1 greatly falls. These two lists have the greatest indeterminacy with respect their group membership, not only among GO levels in the equivalence method but also among other approaches like semantic similarity methods, which are far from similar among them as is discussed below.

# Kidney\_rejection\_gene\_lists\_Equivalence\_method

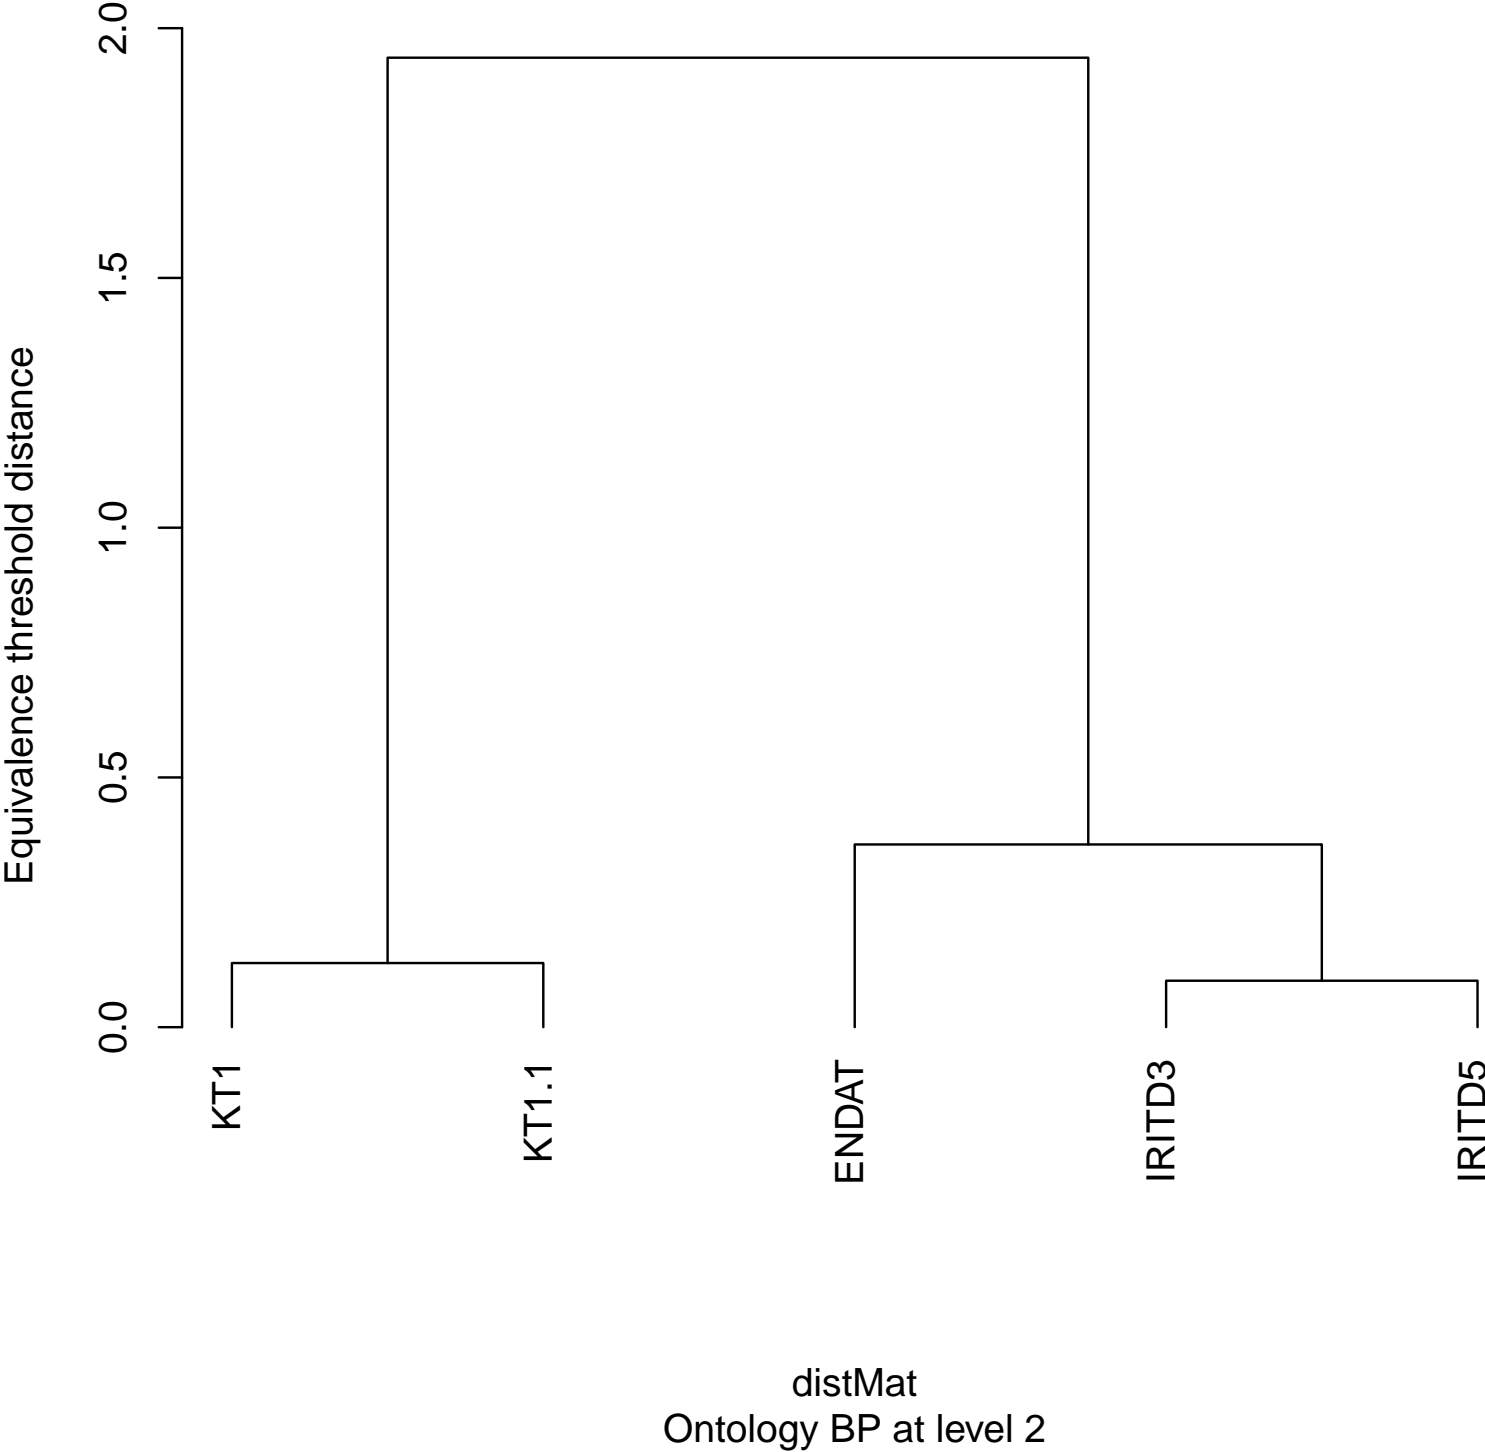

# Kidney\_rejection\_gene\_lists\_Equivalence\_method

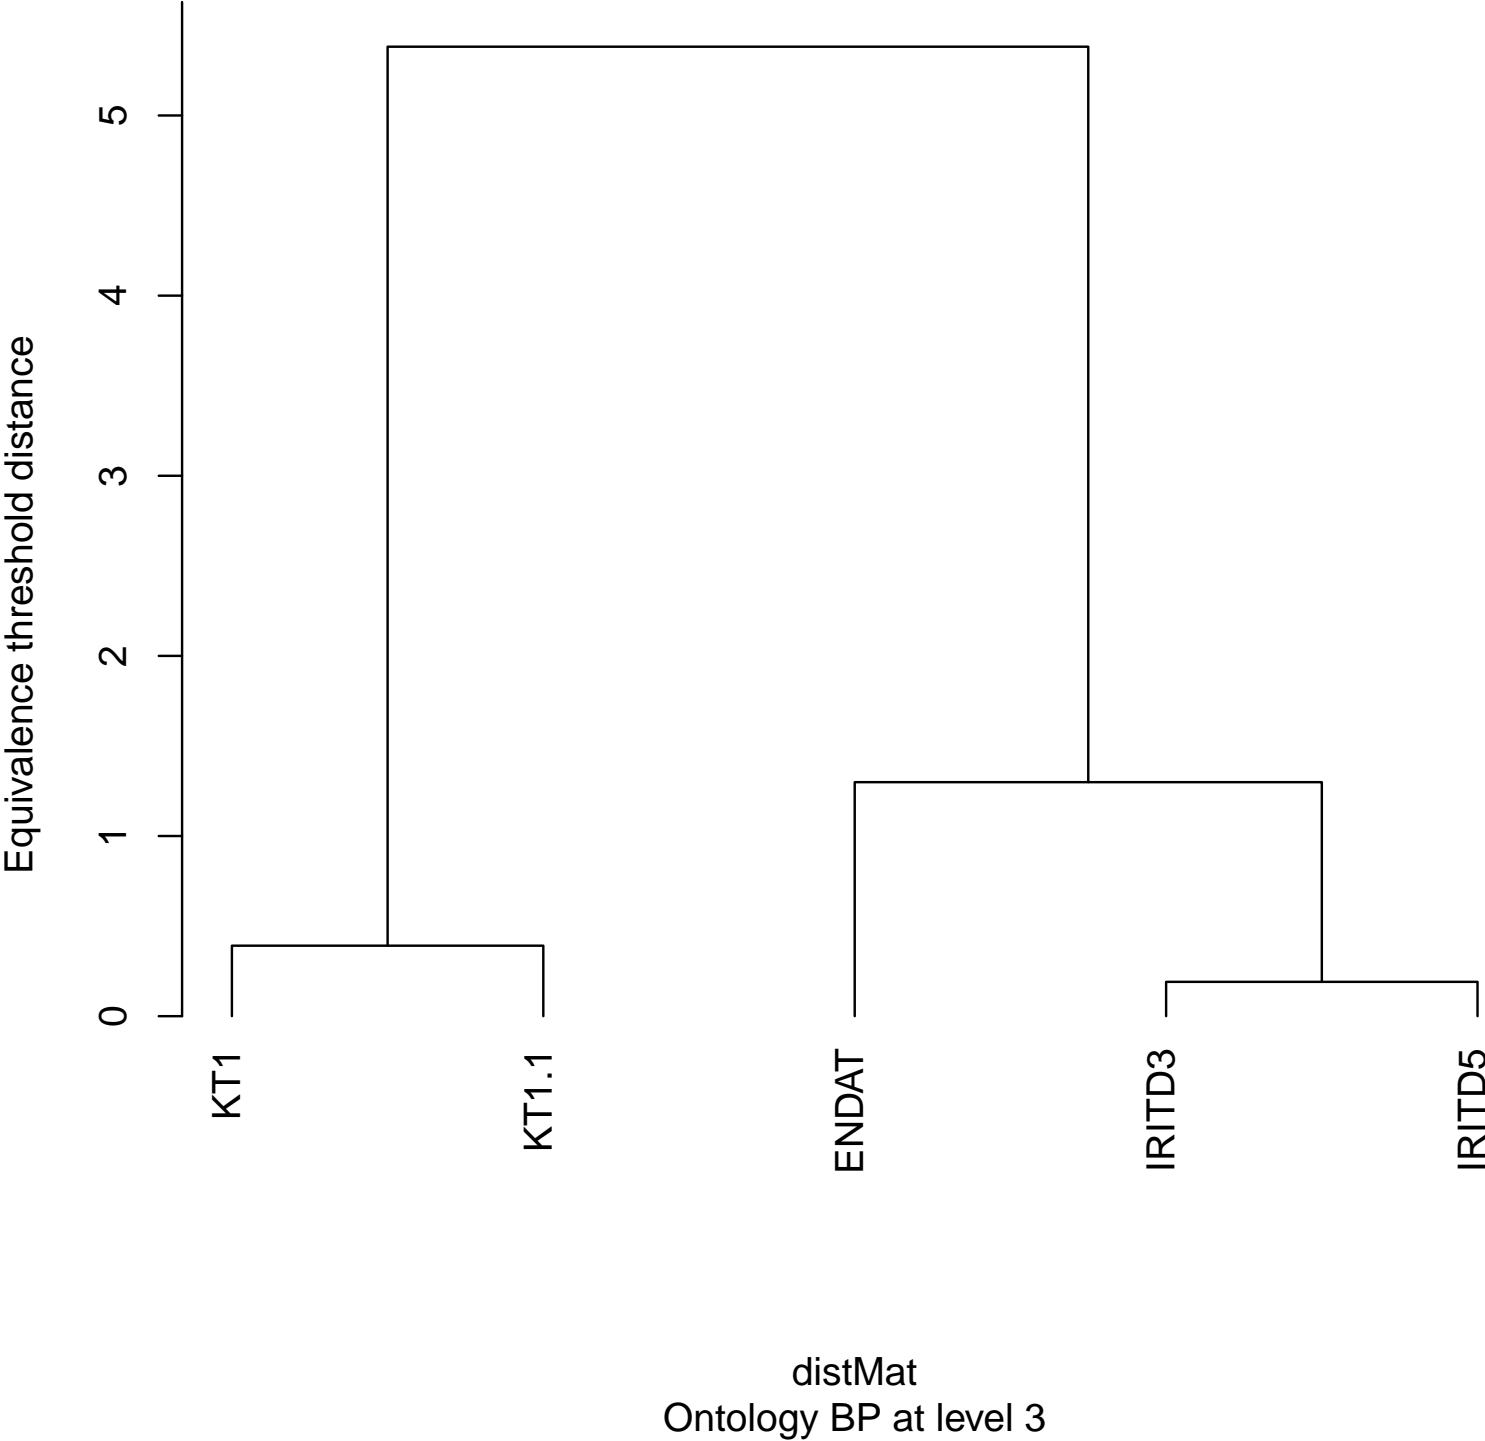

# Kidney\_rejection\_gene\_lists\_Equivalence\_method

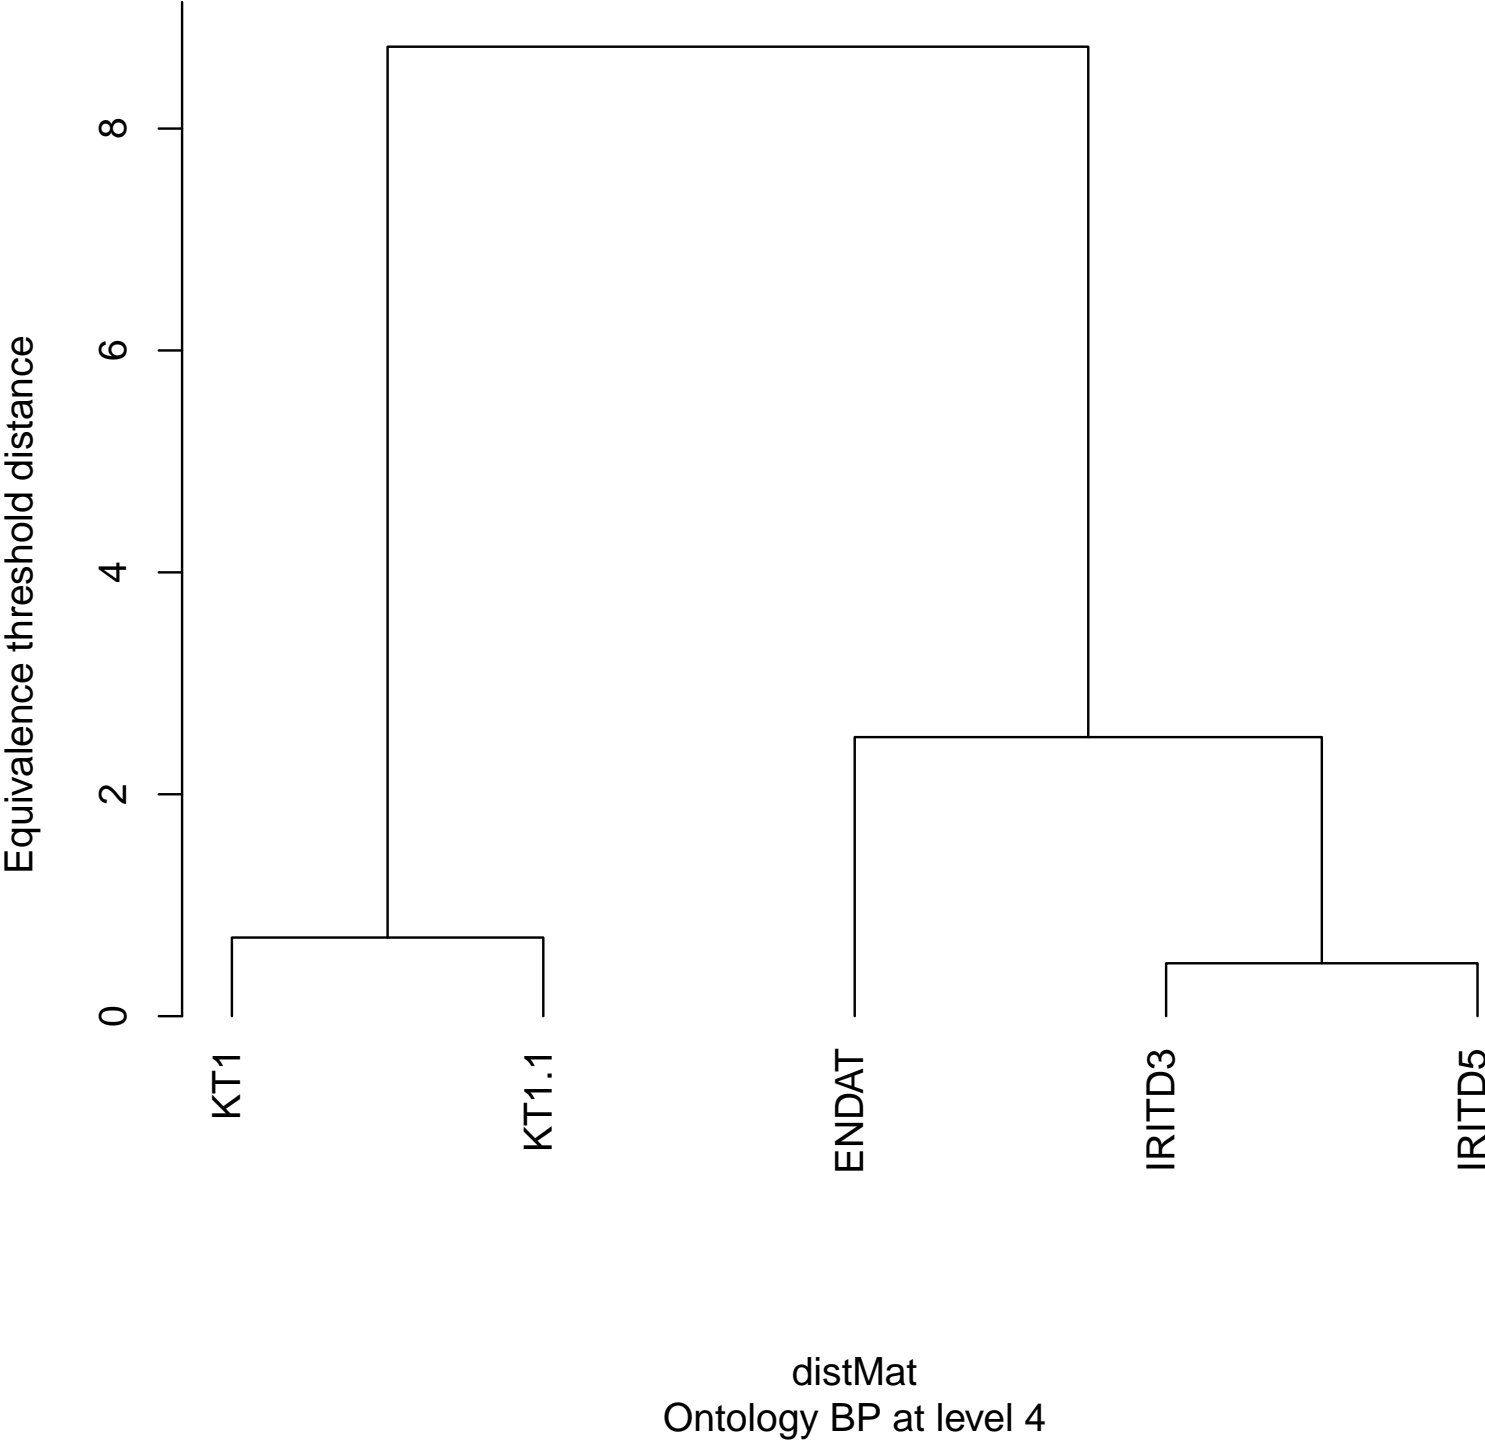



# Kidney\_rejection\_gene\_lists\_Equivalence\_method

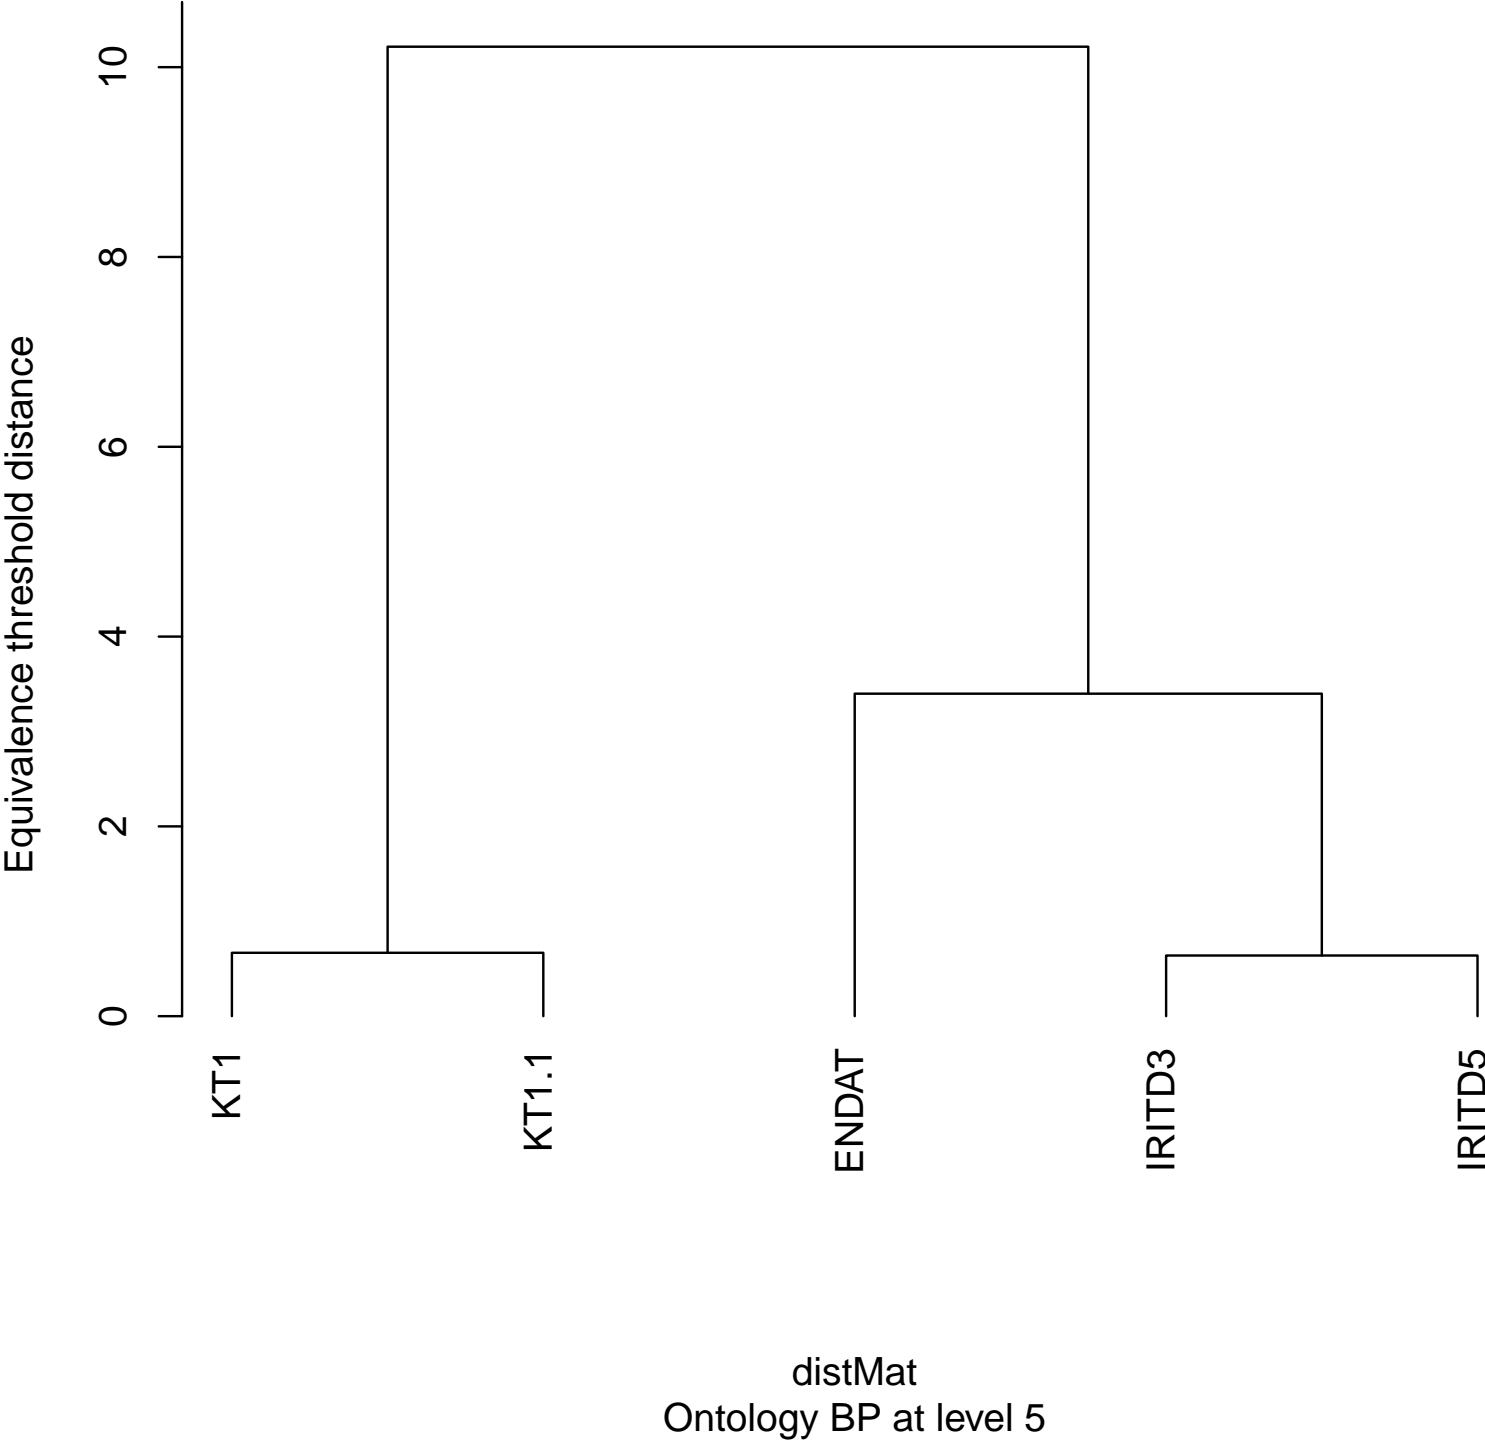

# Kidney\_rejection\_gene\_lists\_Equivalence\_method

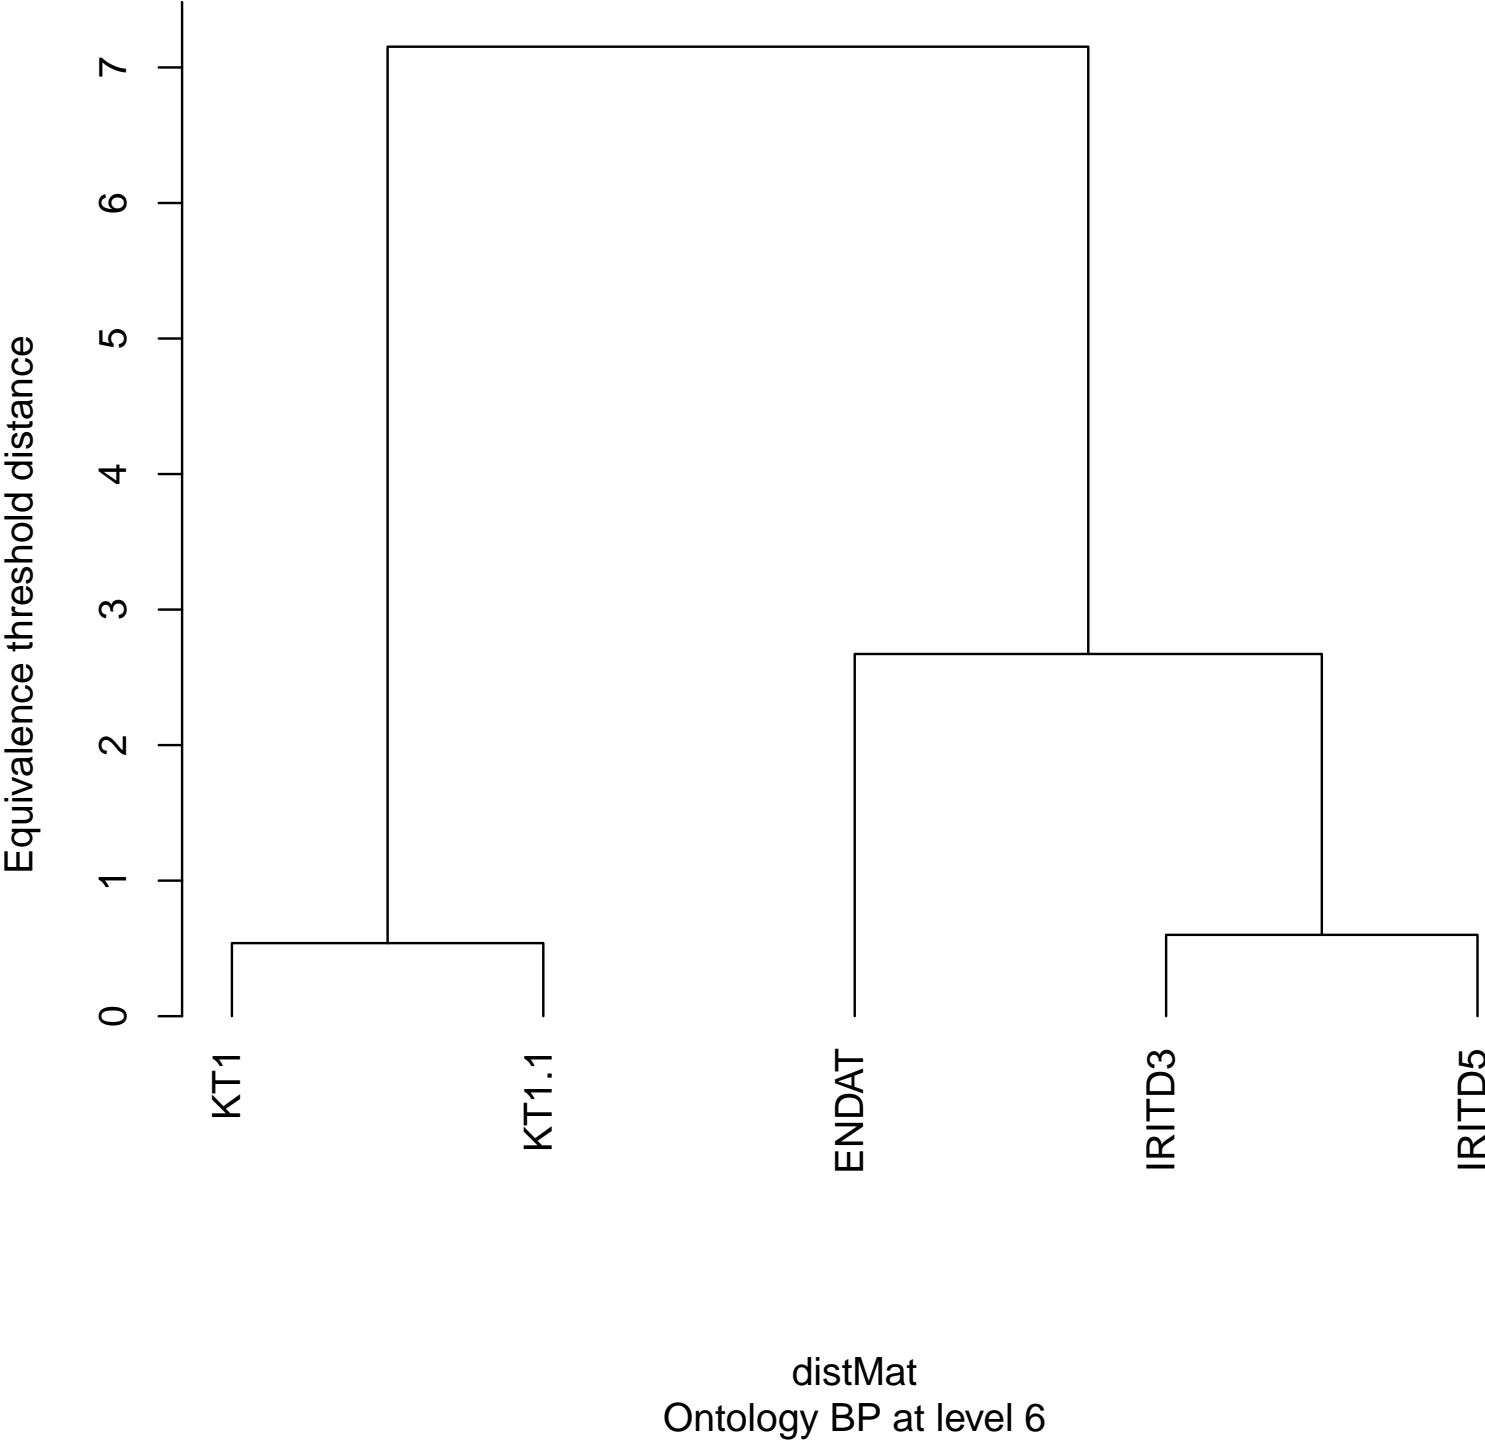

# Kidney\_rejection\_gene\_lists\_Equivalence\_method

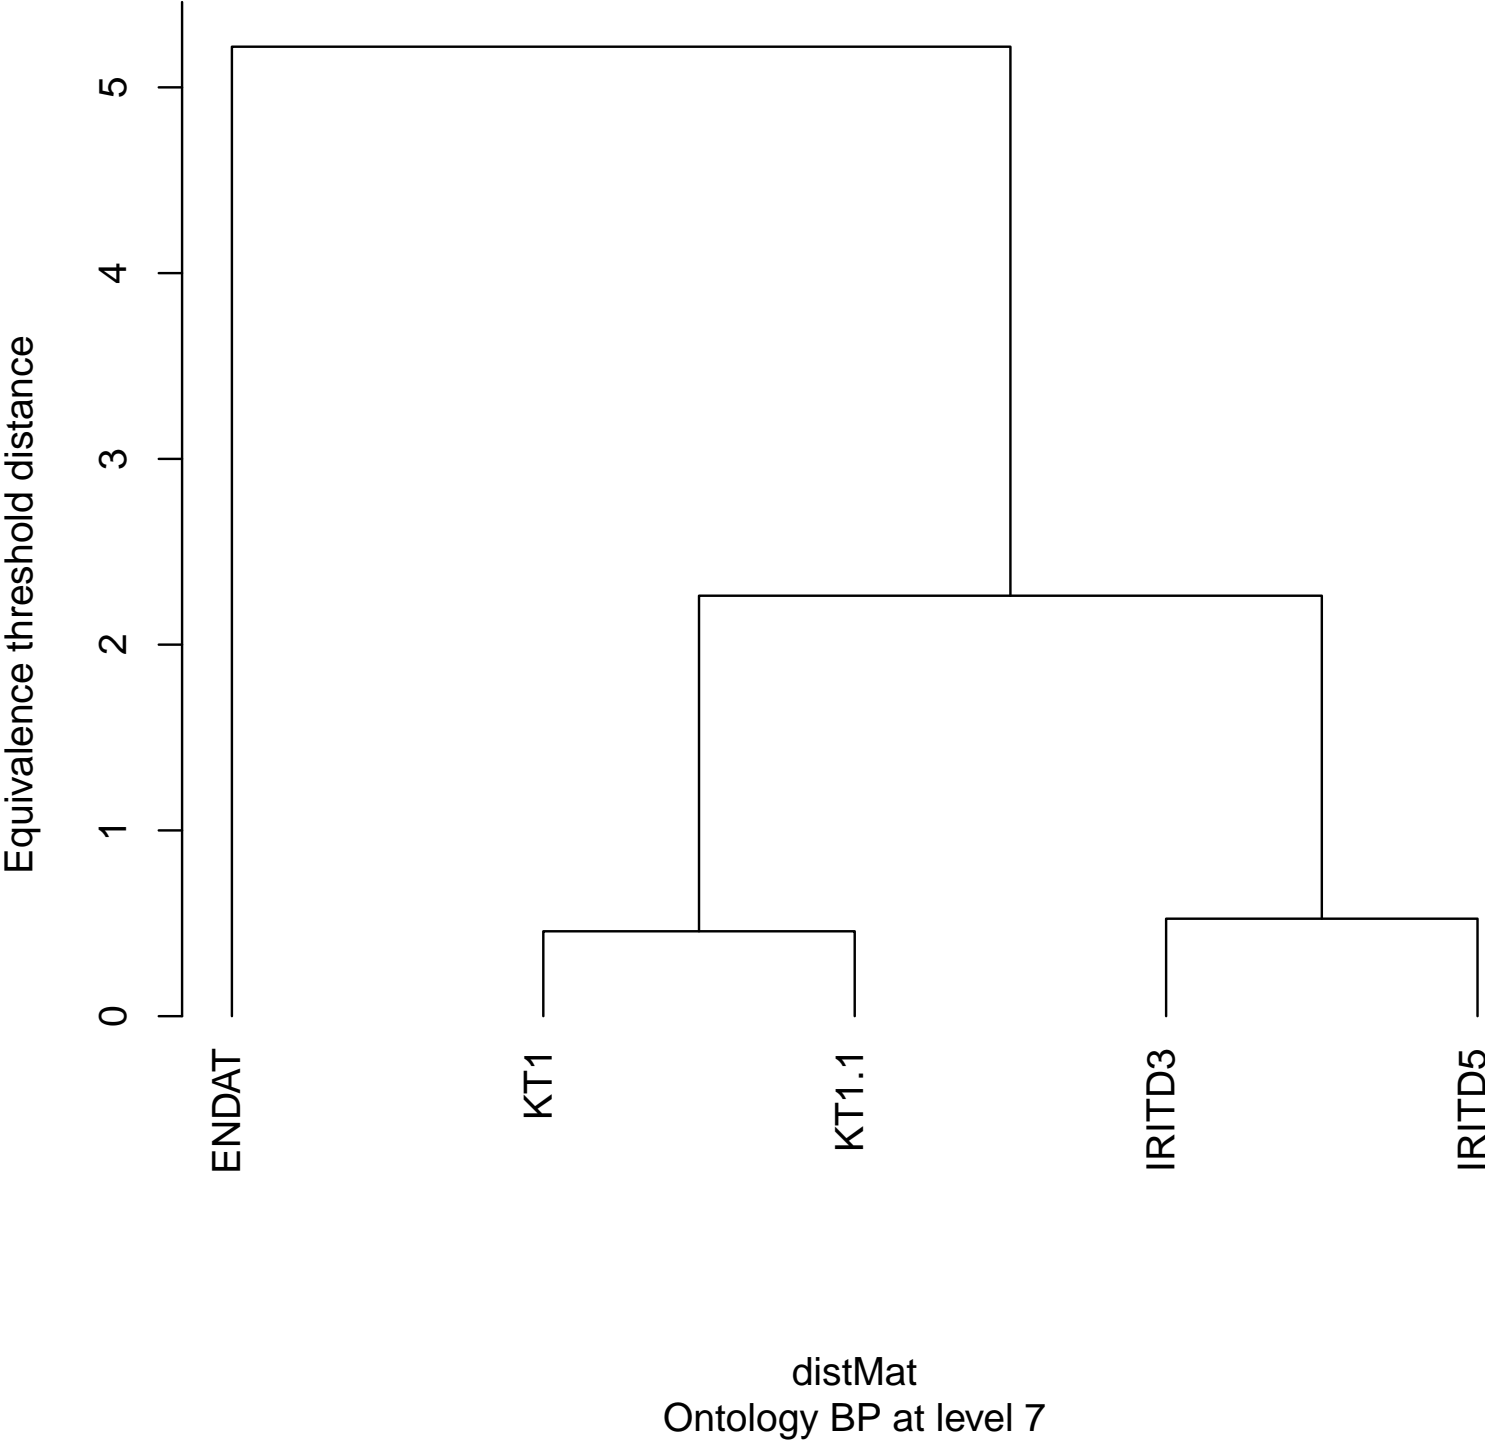

# Kidney\_rejection\_gene\_lists\_Equivalence\_method

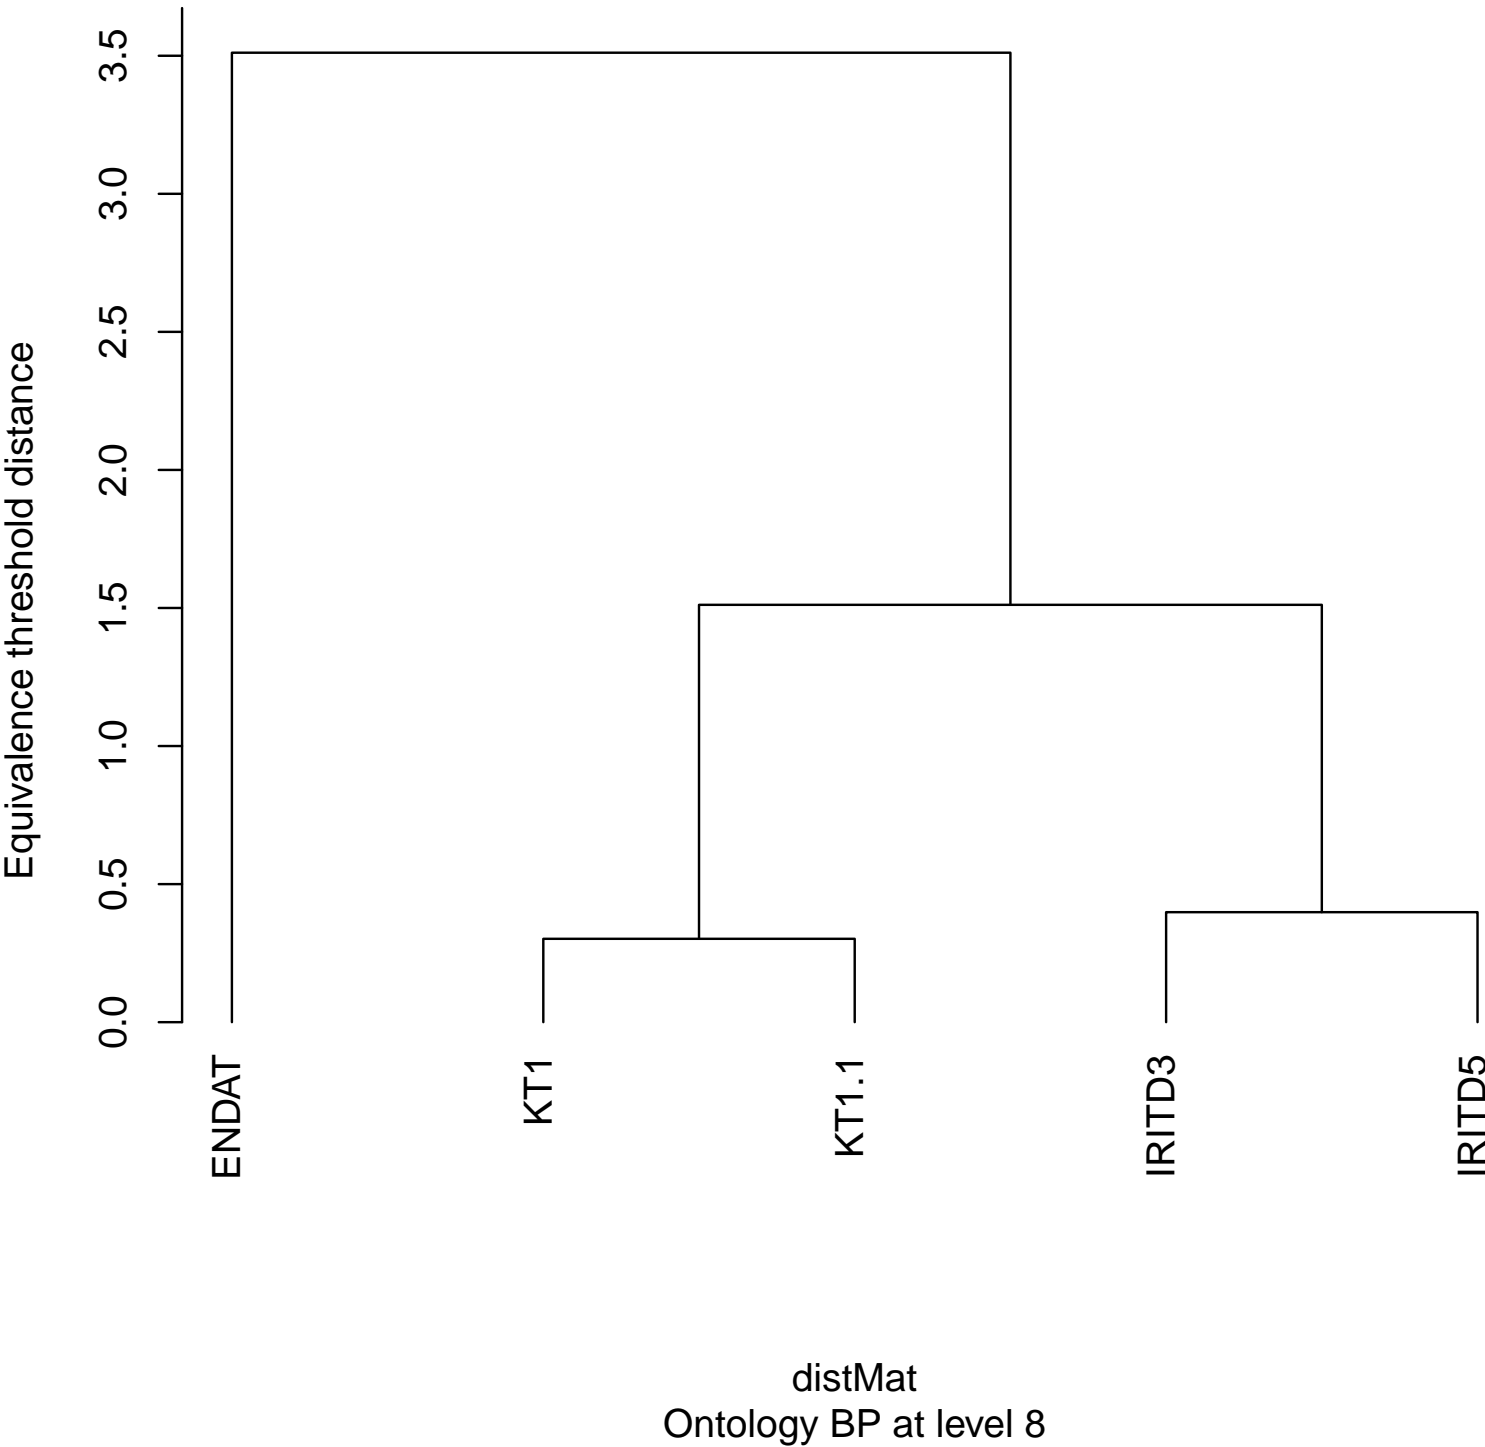

# Kidney\_rejection\_gene\_lists\_Equivalence\_method

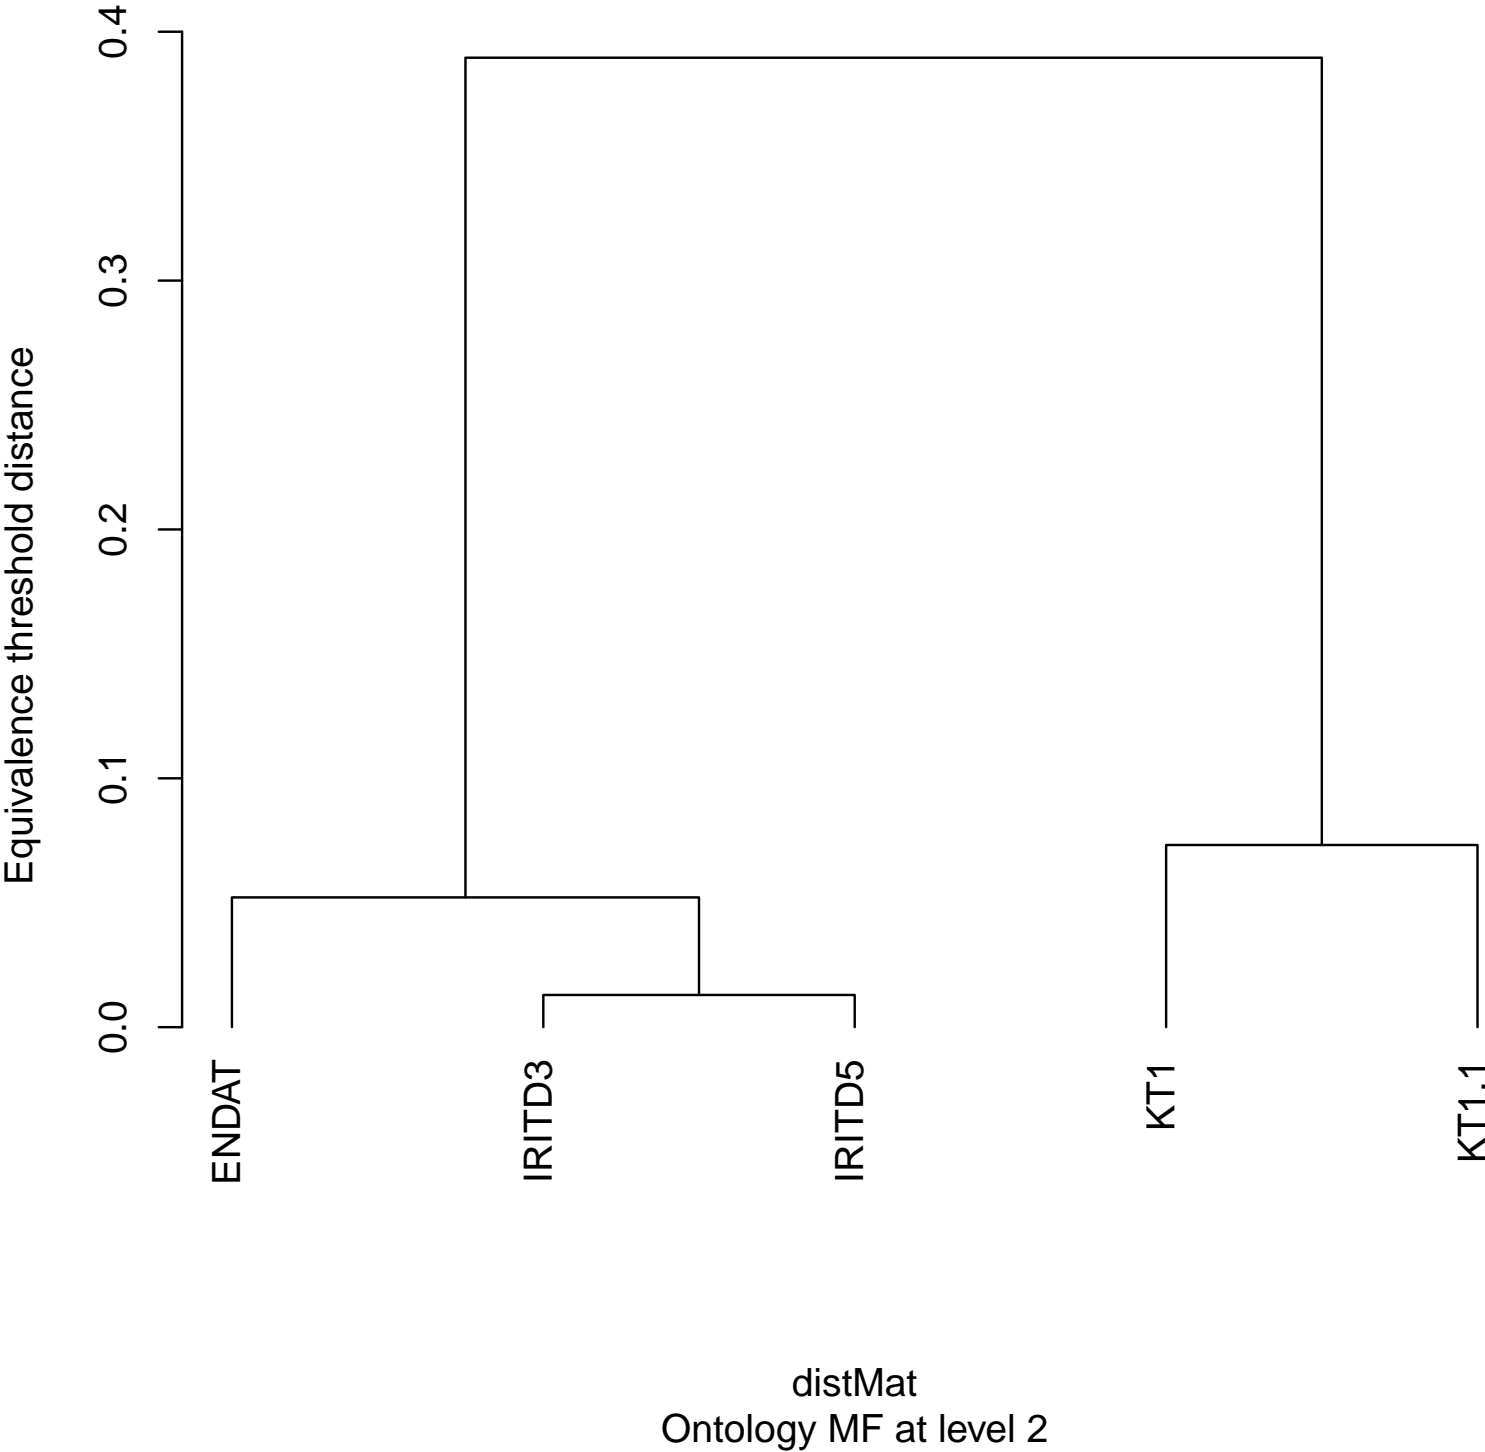

# Kidney\_rejection\_gene\_lists\_Equivalence\_method

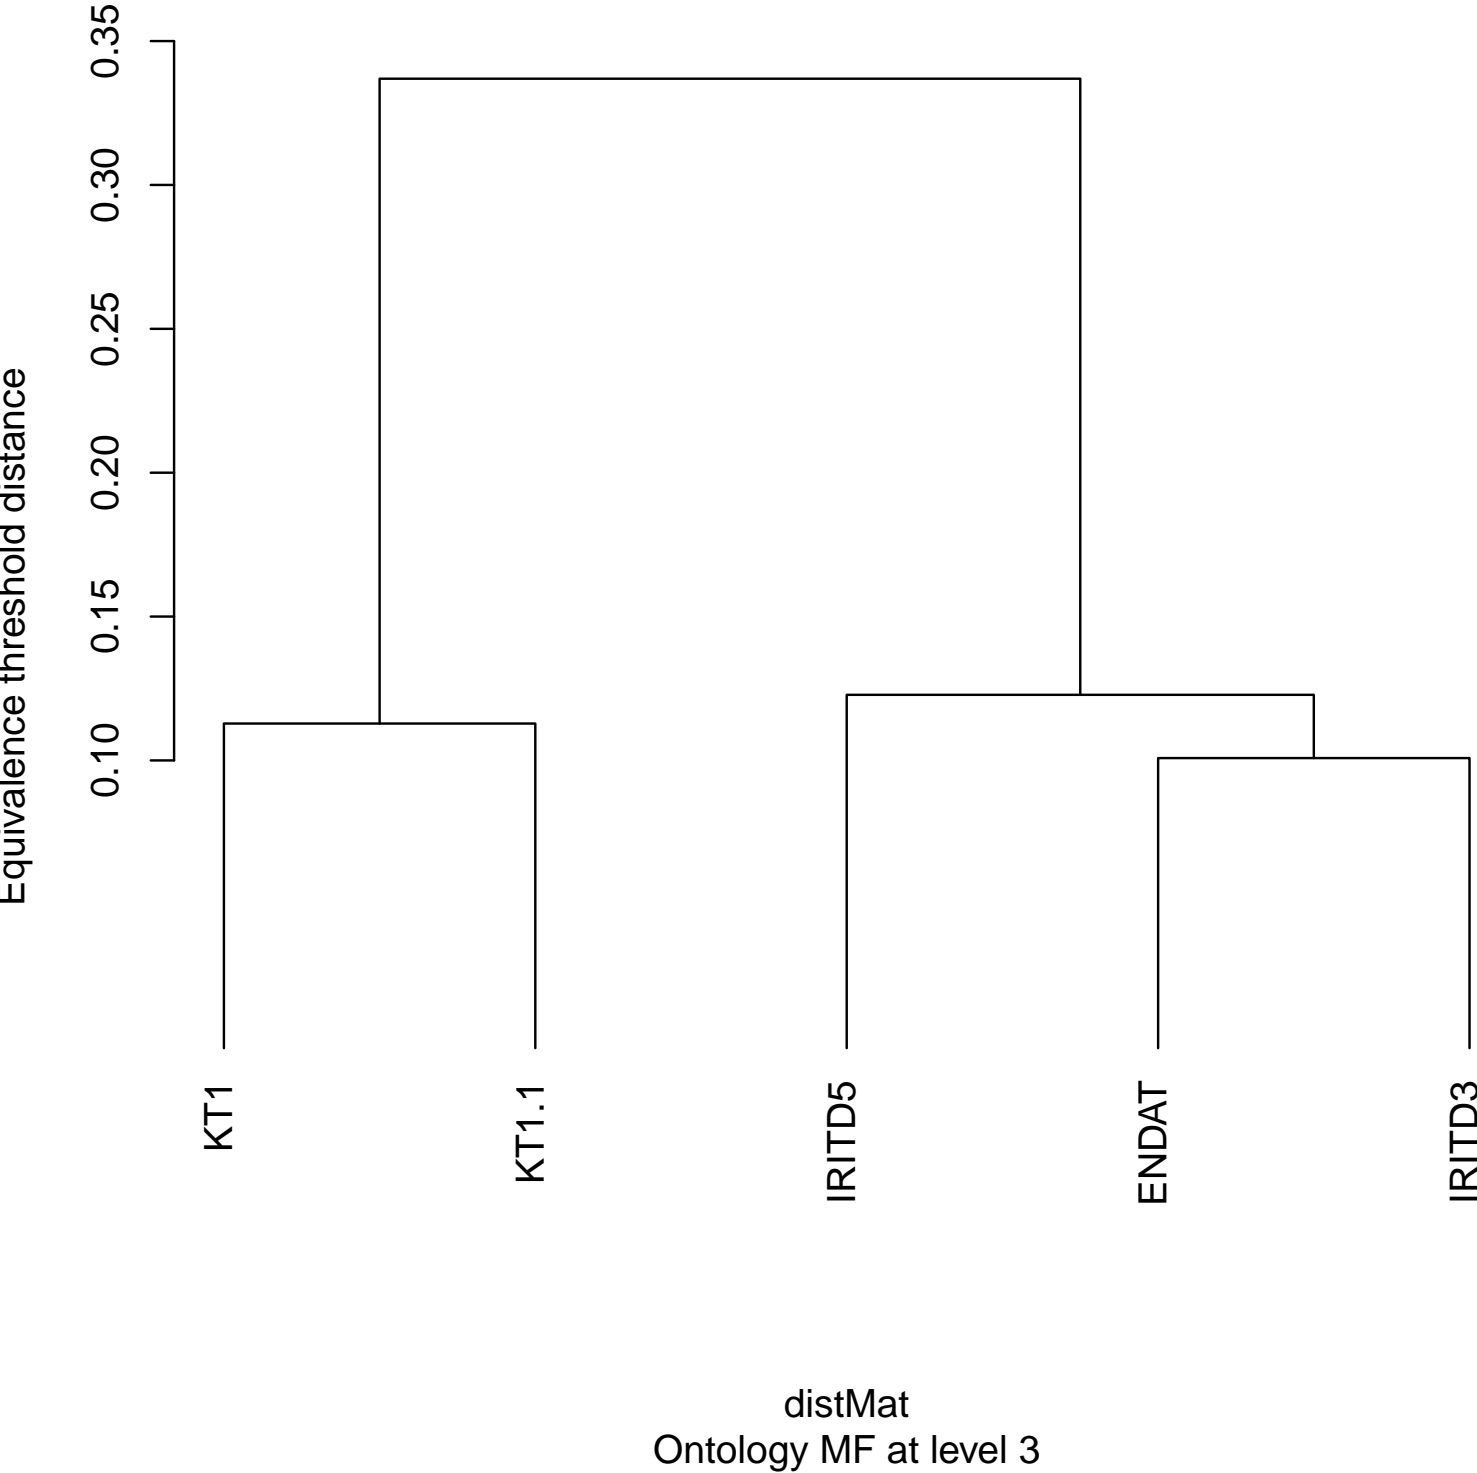

# Kidney\_rejection\_gene\_lists\_Equivalence\_method

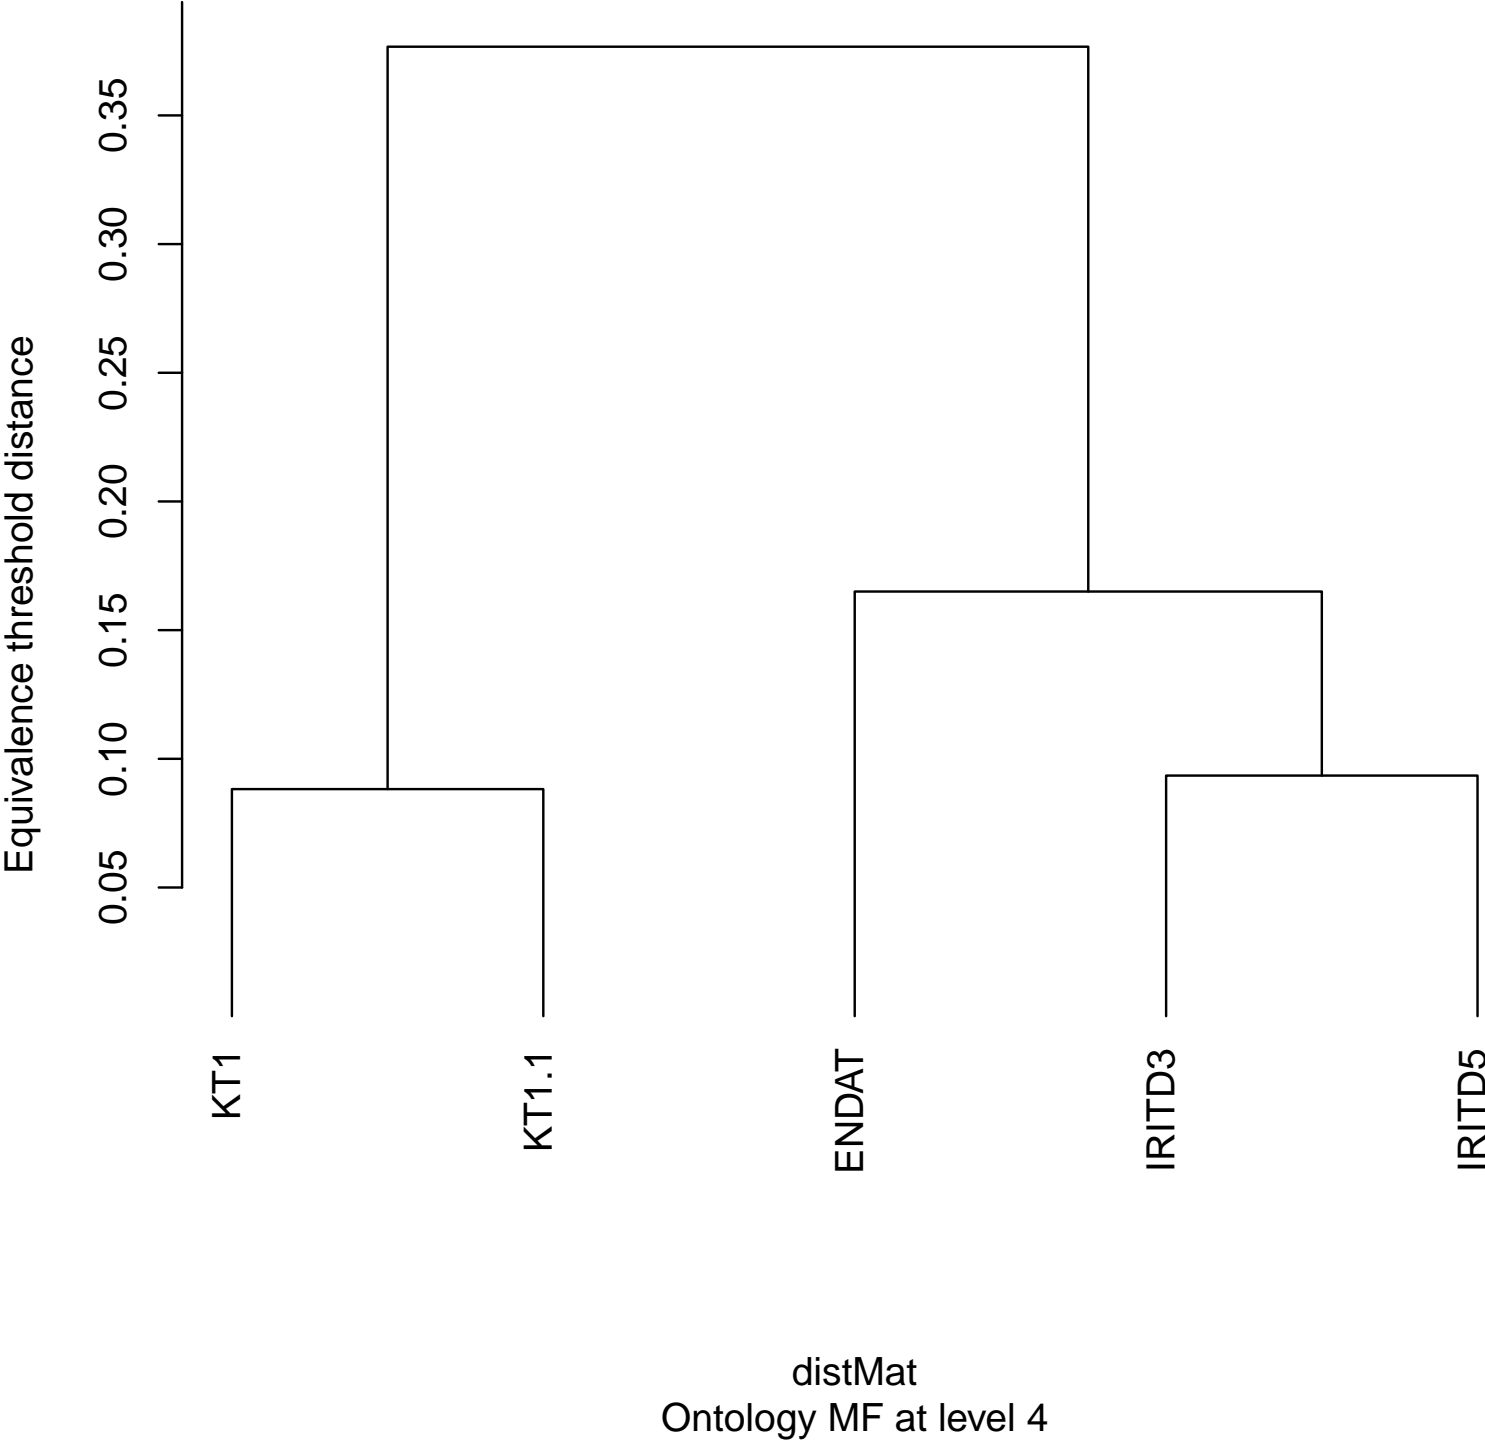

# Kidney\_rejection\_gene\_lists\_Equivalence\_method

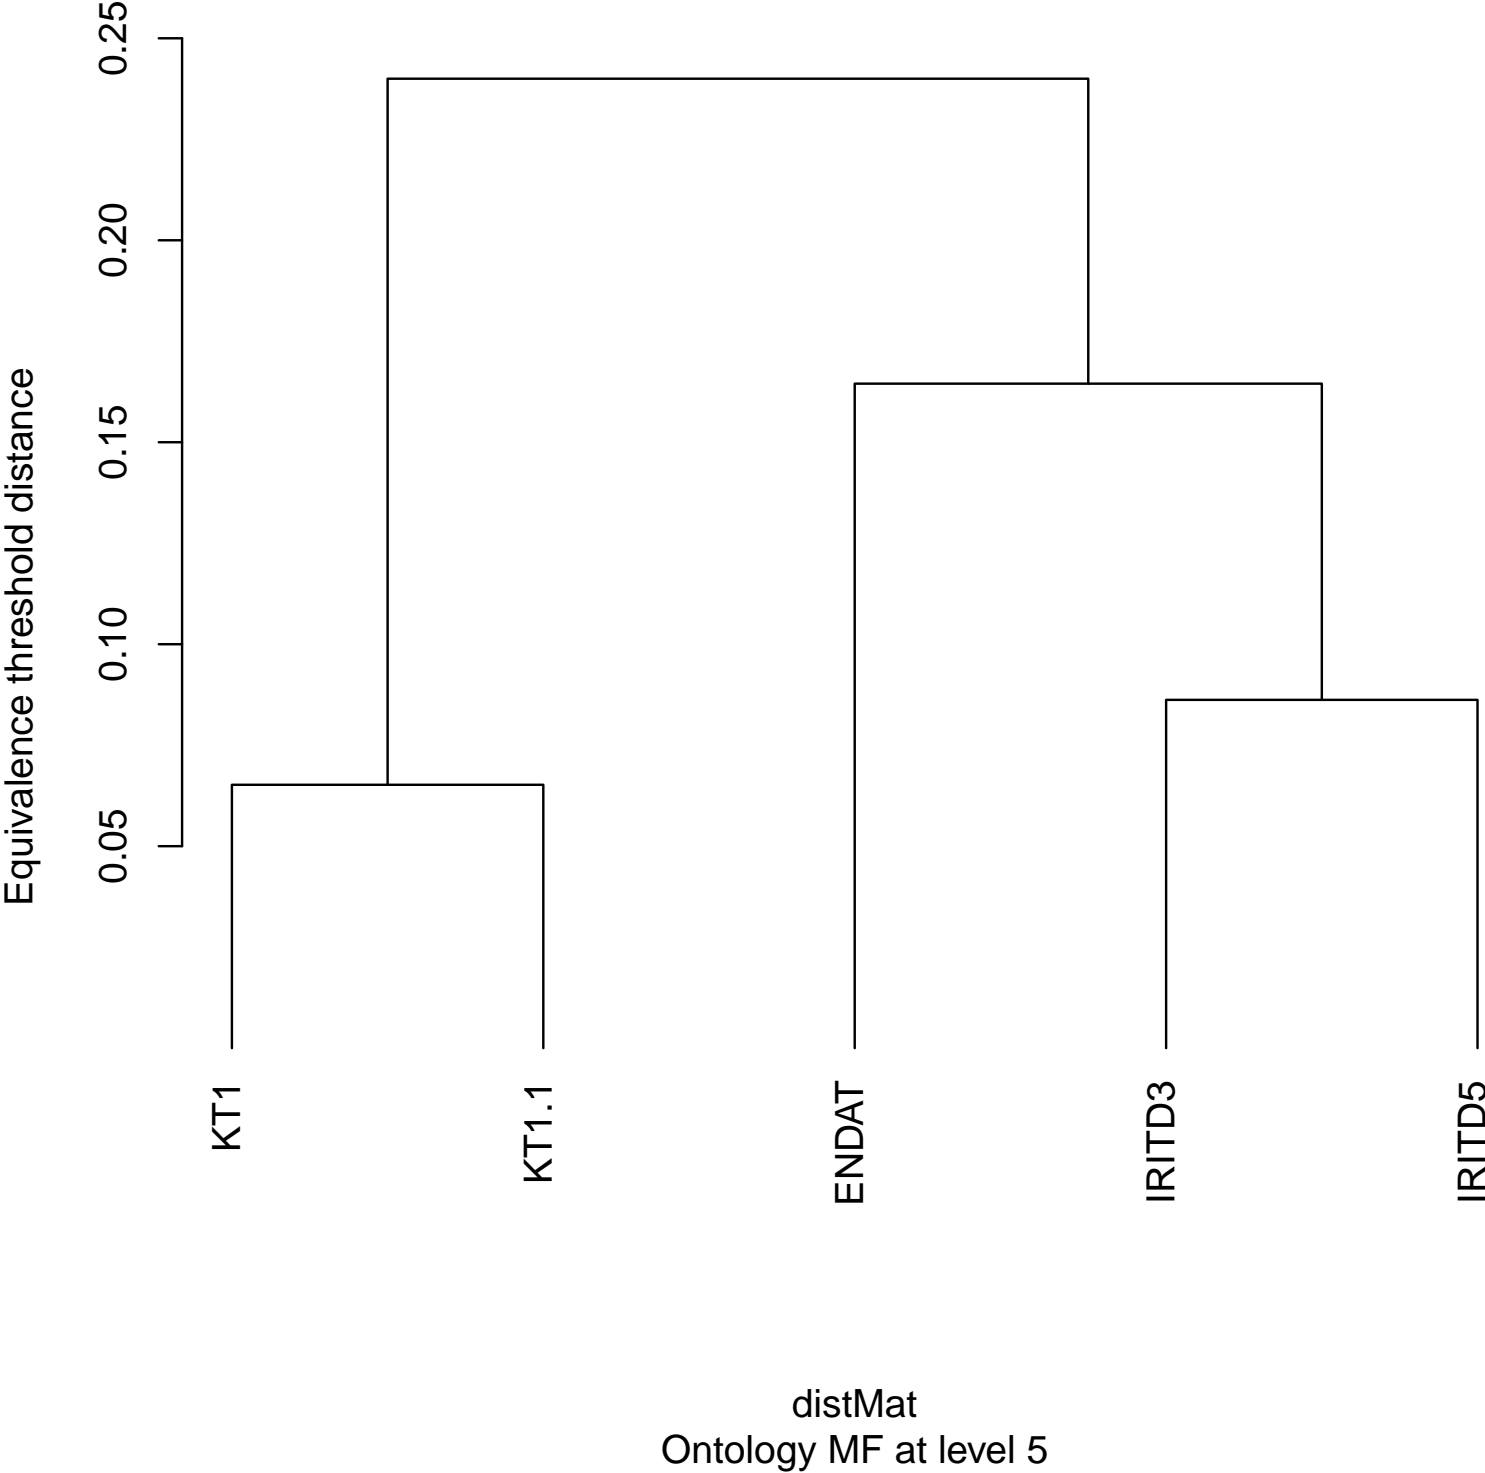



# Kidney\_rejection\_gene\_lists\_Equivalence\_method

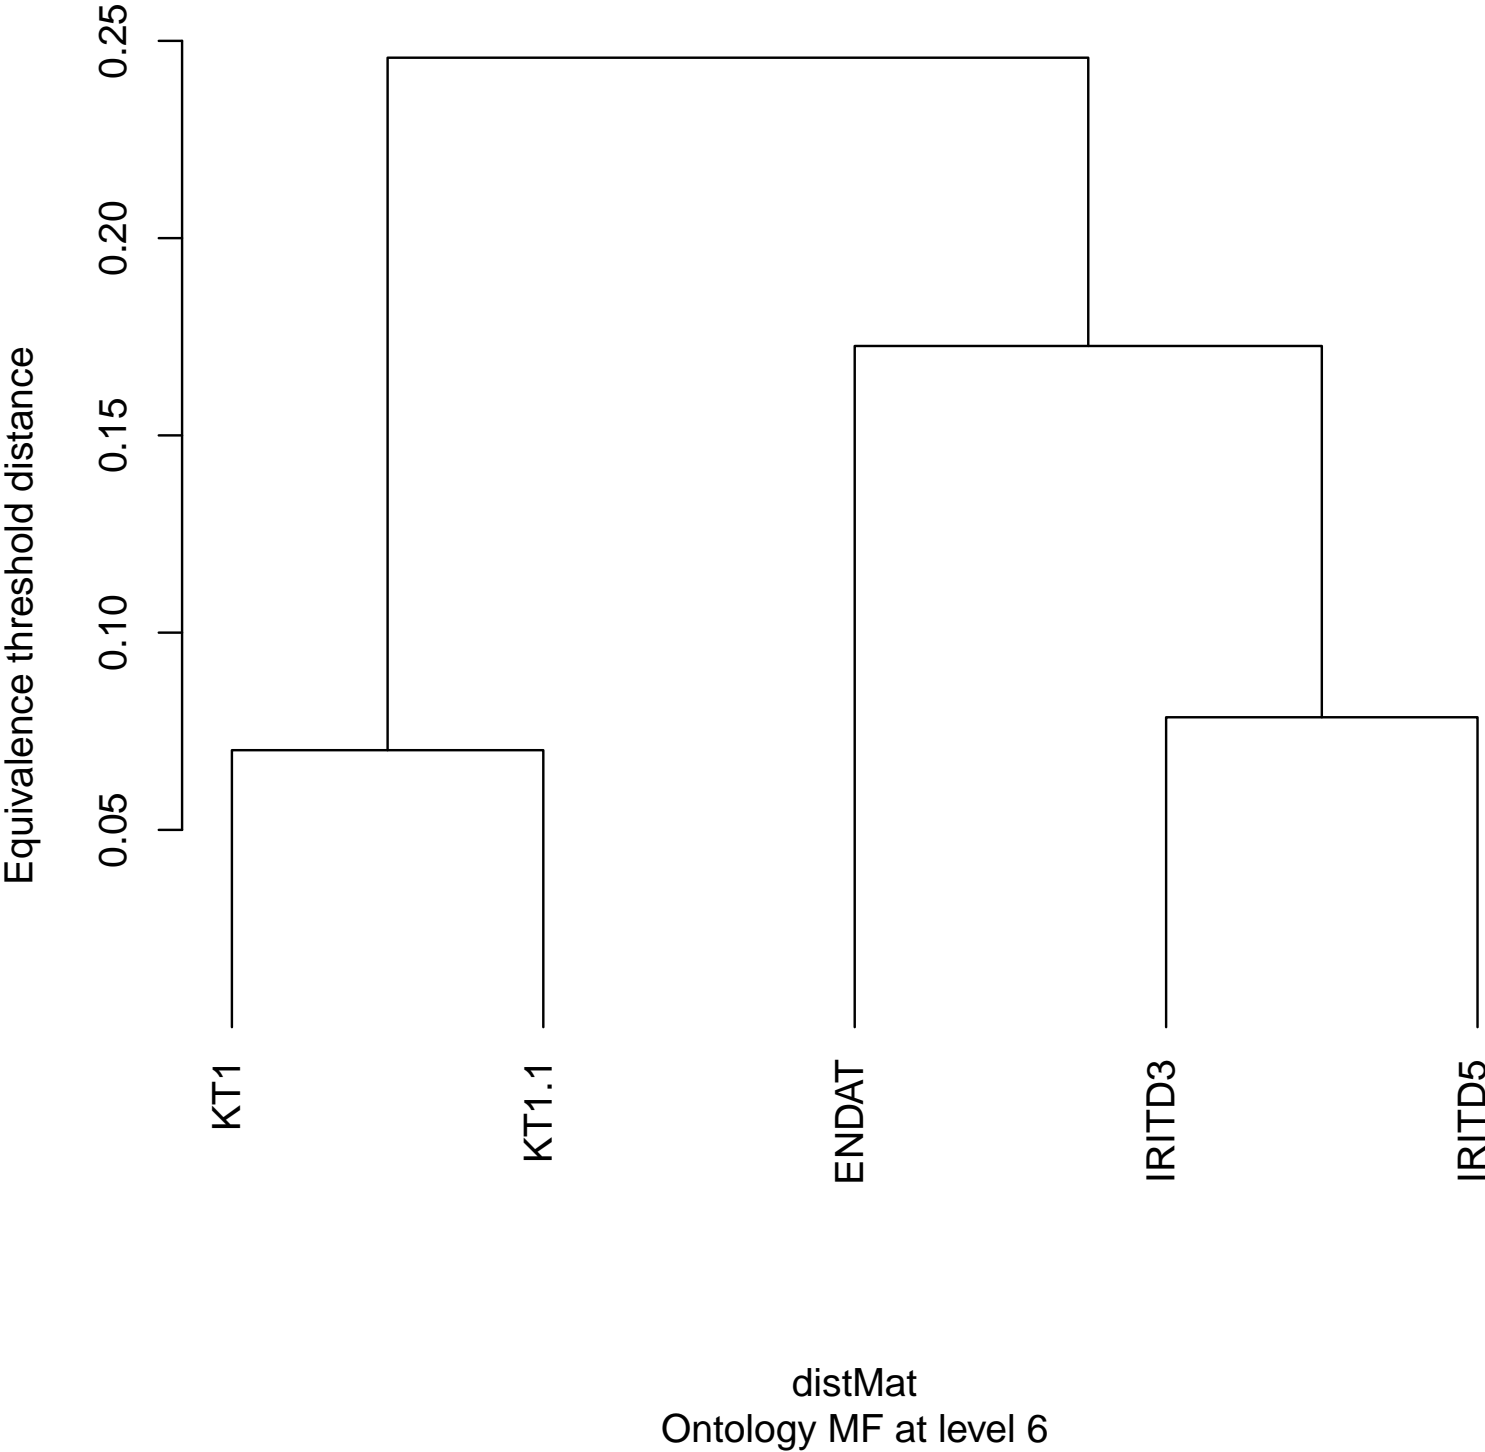

# Kidney\_rejection\_gene\_lists\_Equivalence\_method

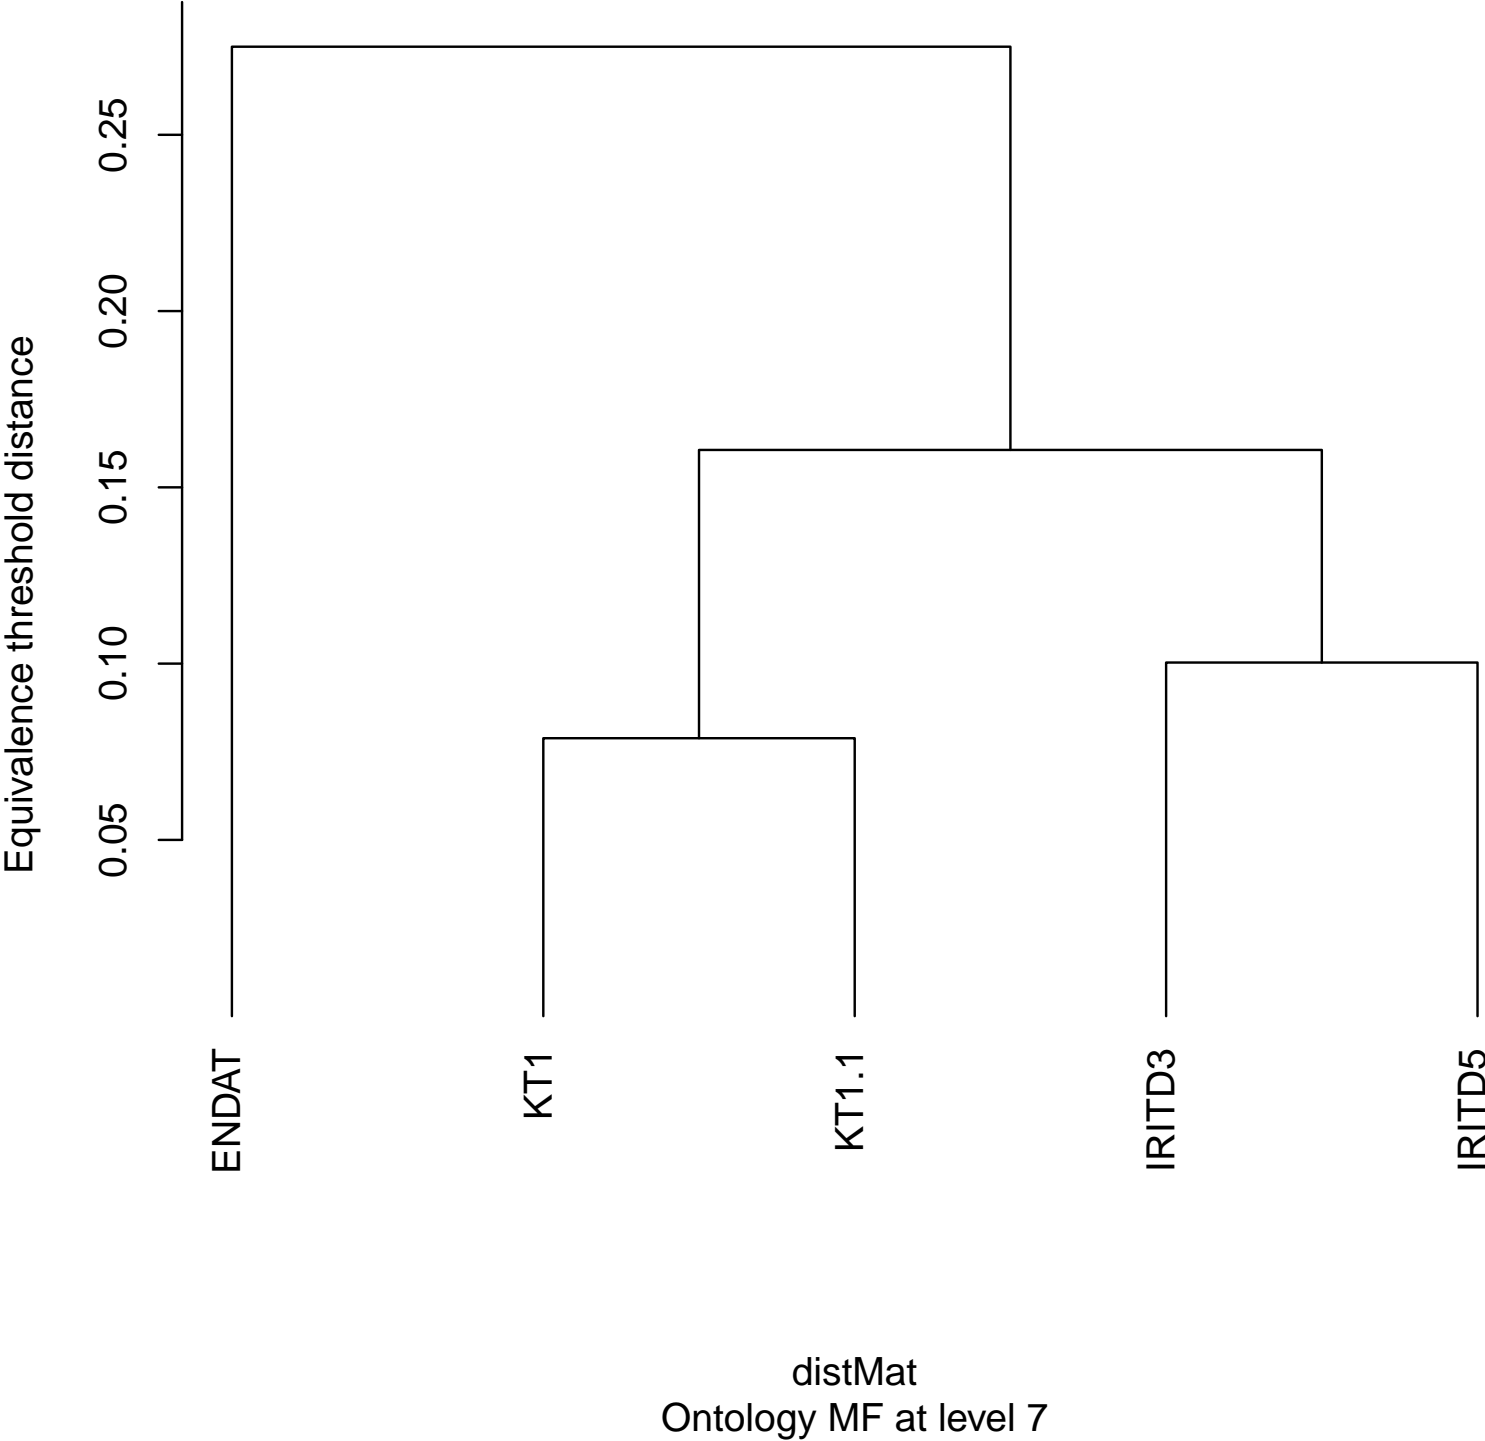

# Kidney\_rejection\_gene\_lists\_Equivalence\_method

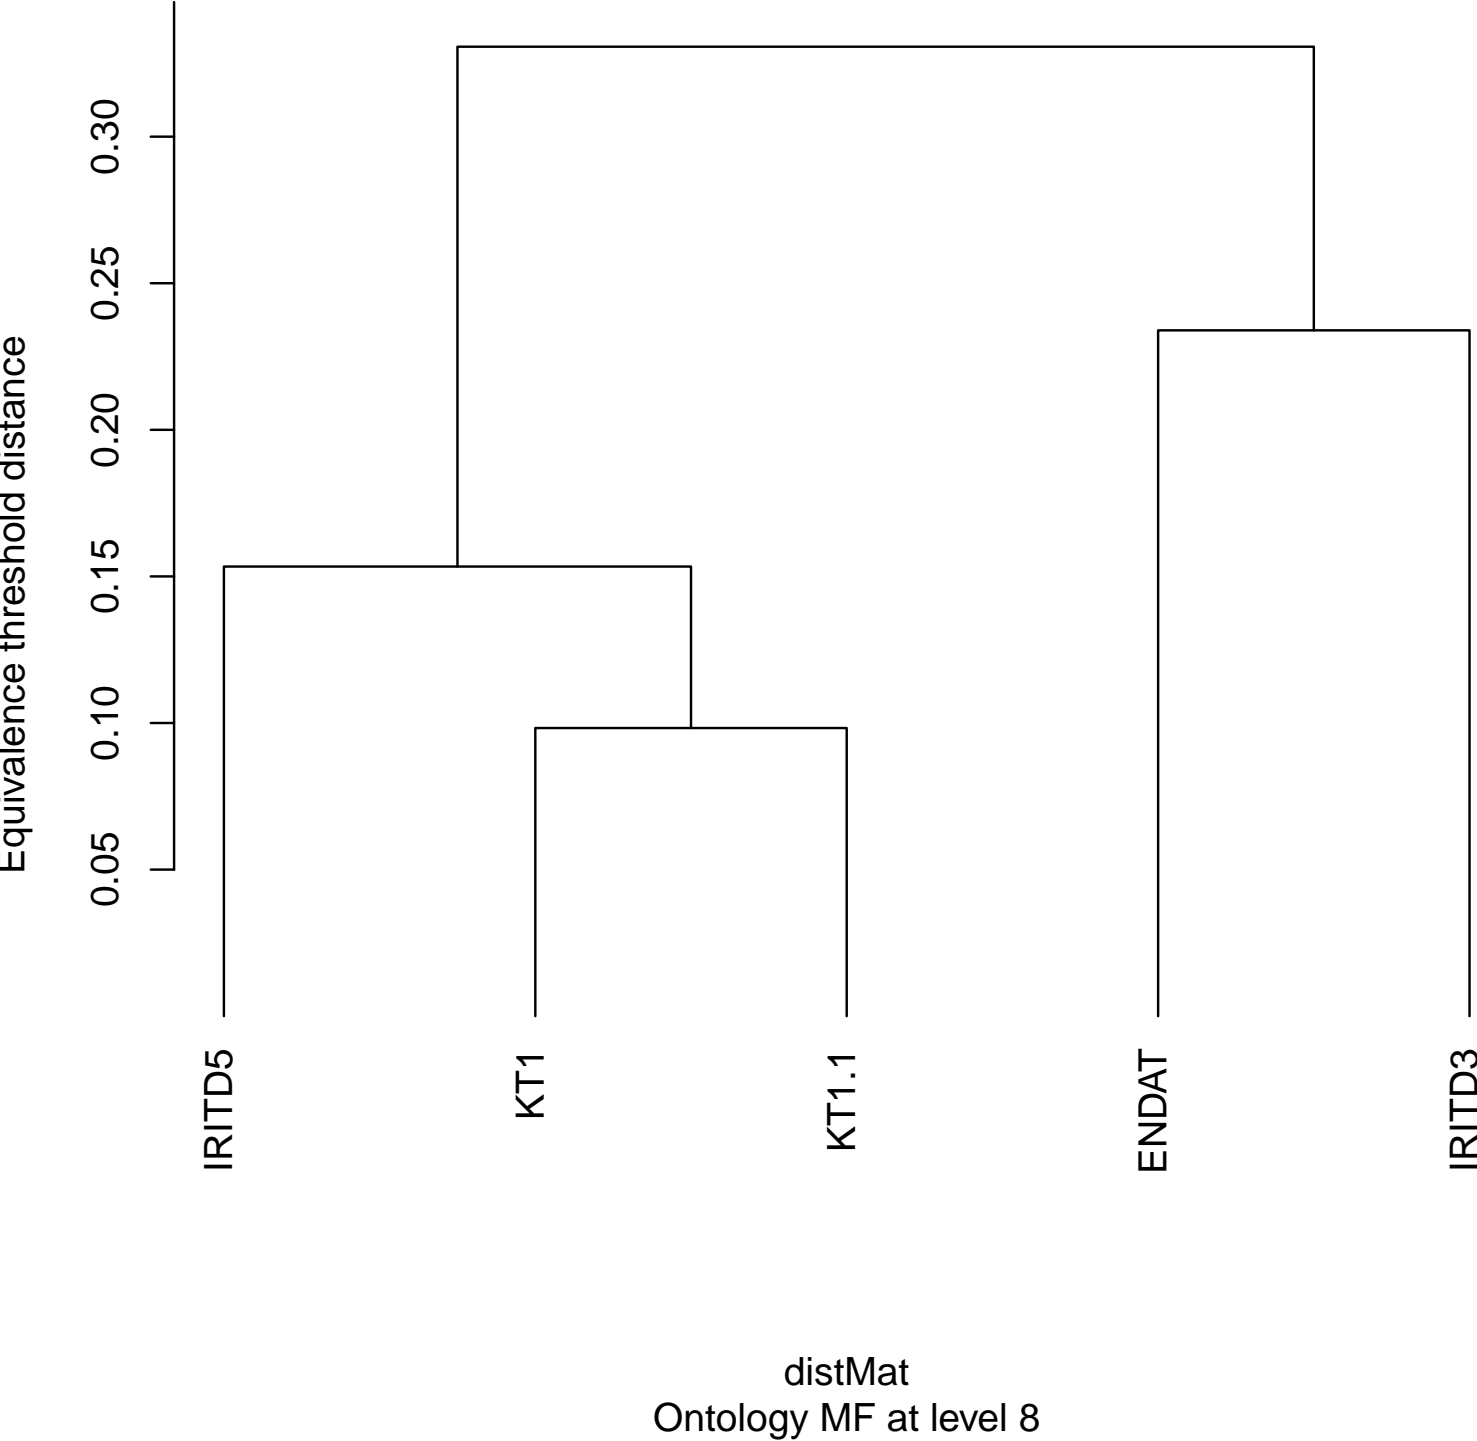

# Kidney\_rejection\_gene\_lists\_Equivalence\_method

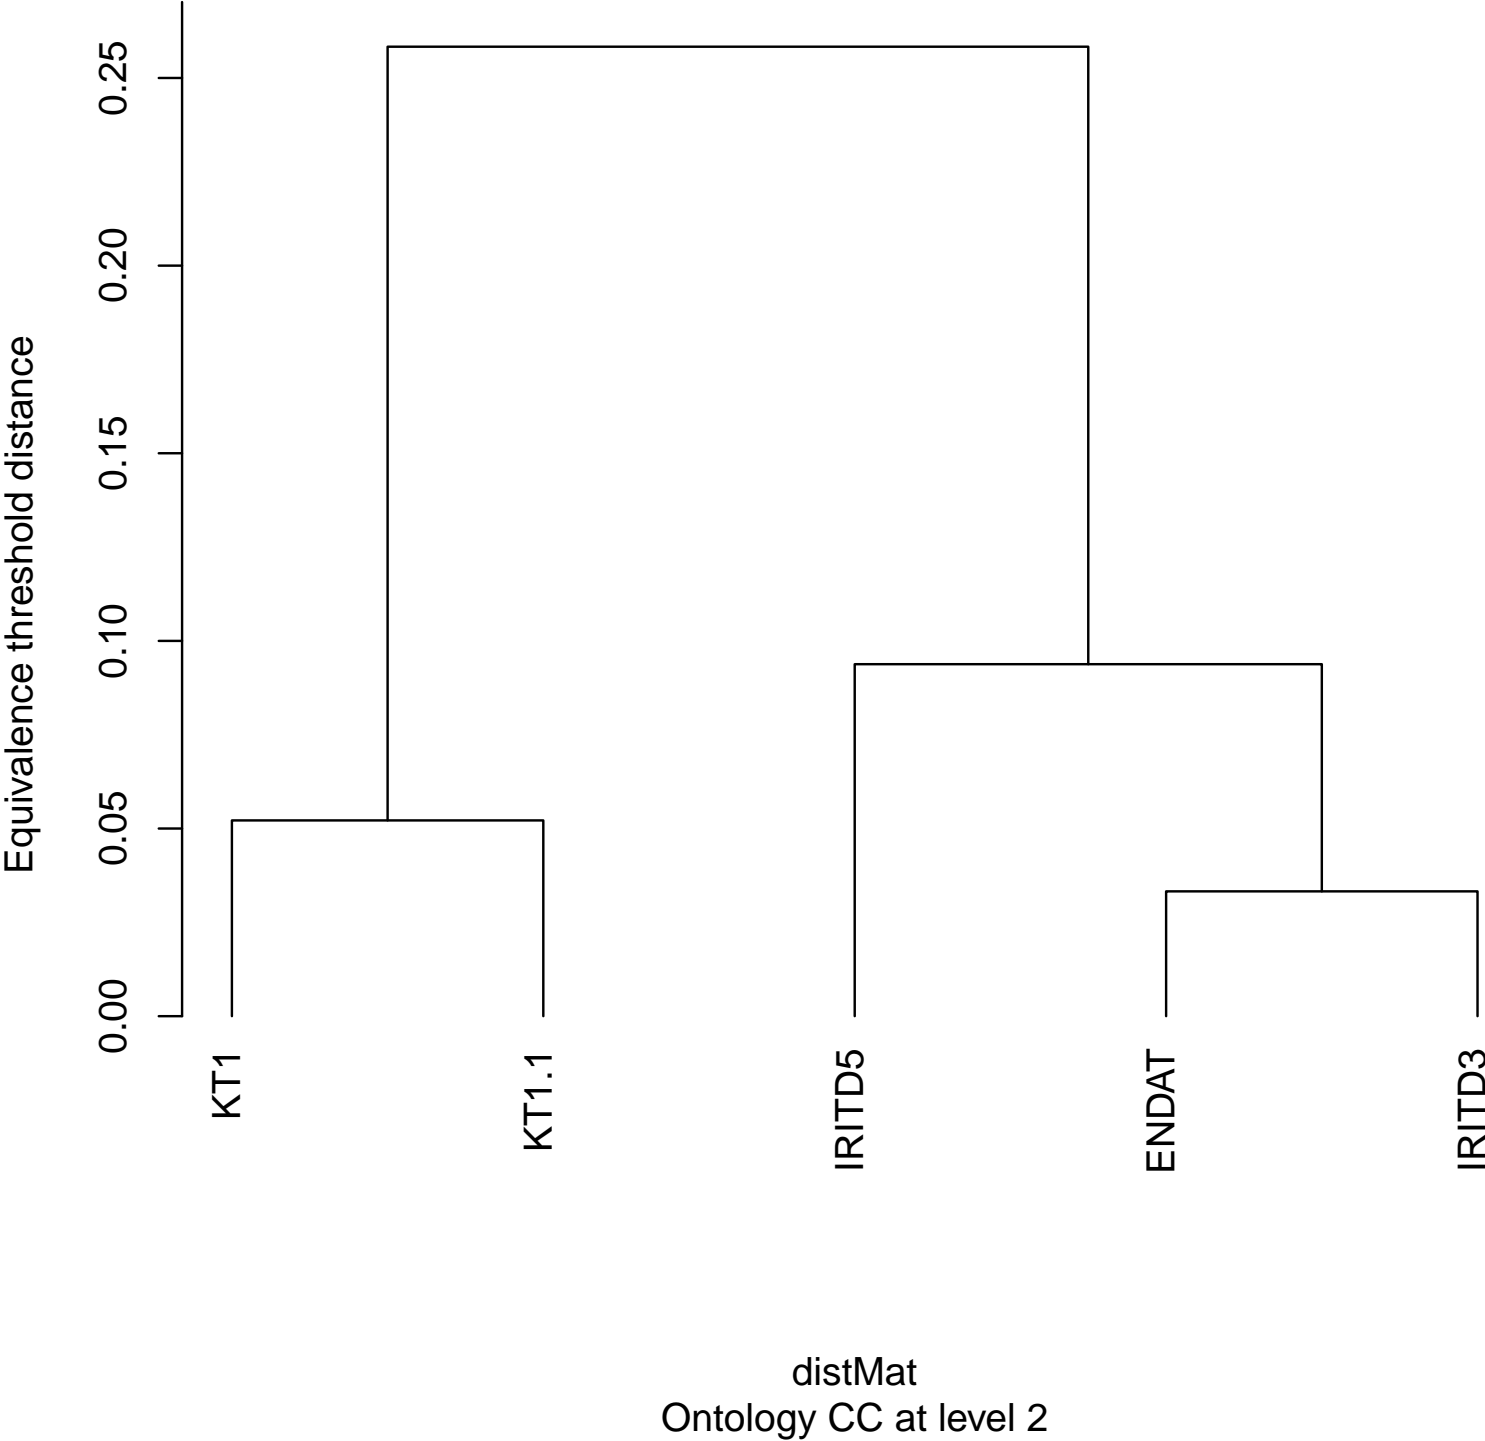

# Kidney\_rejection\_gene\_lists\_Equivalence\_method

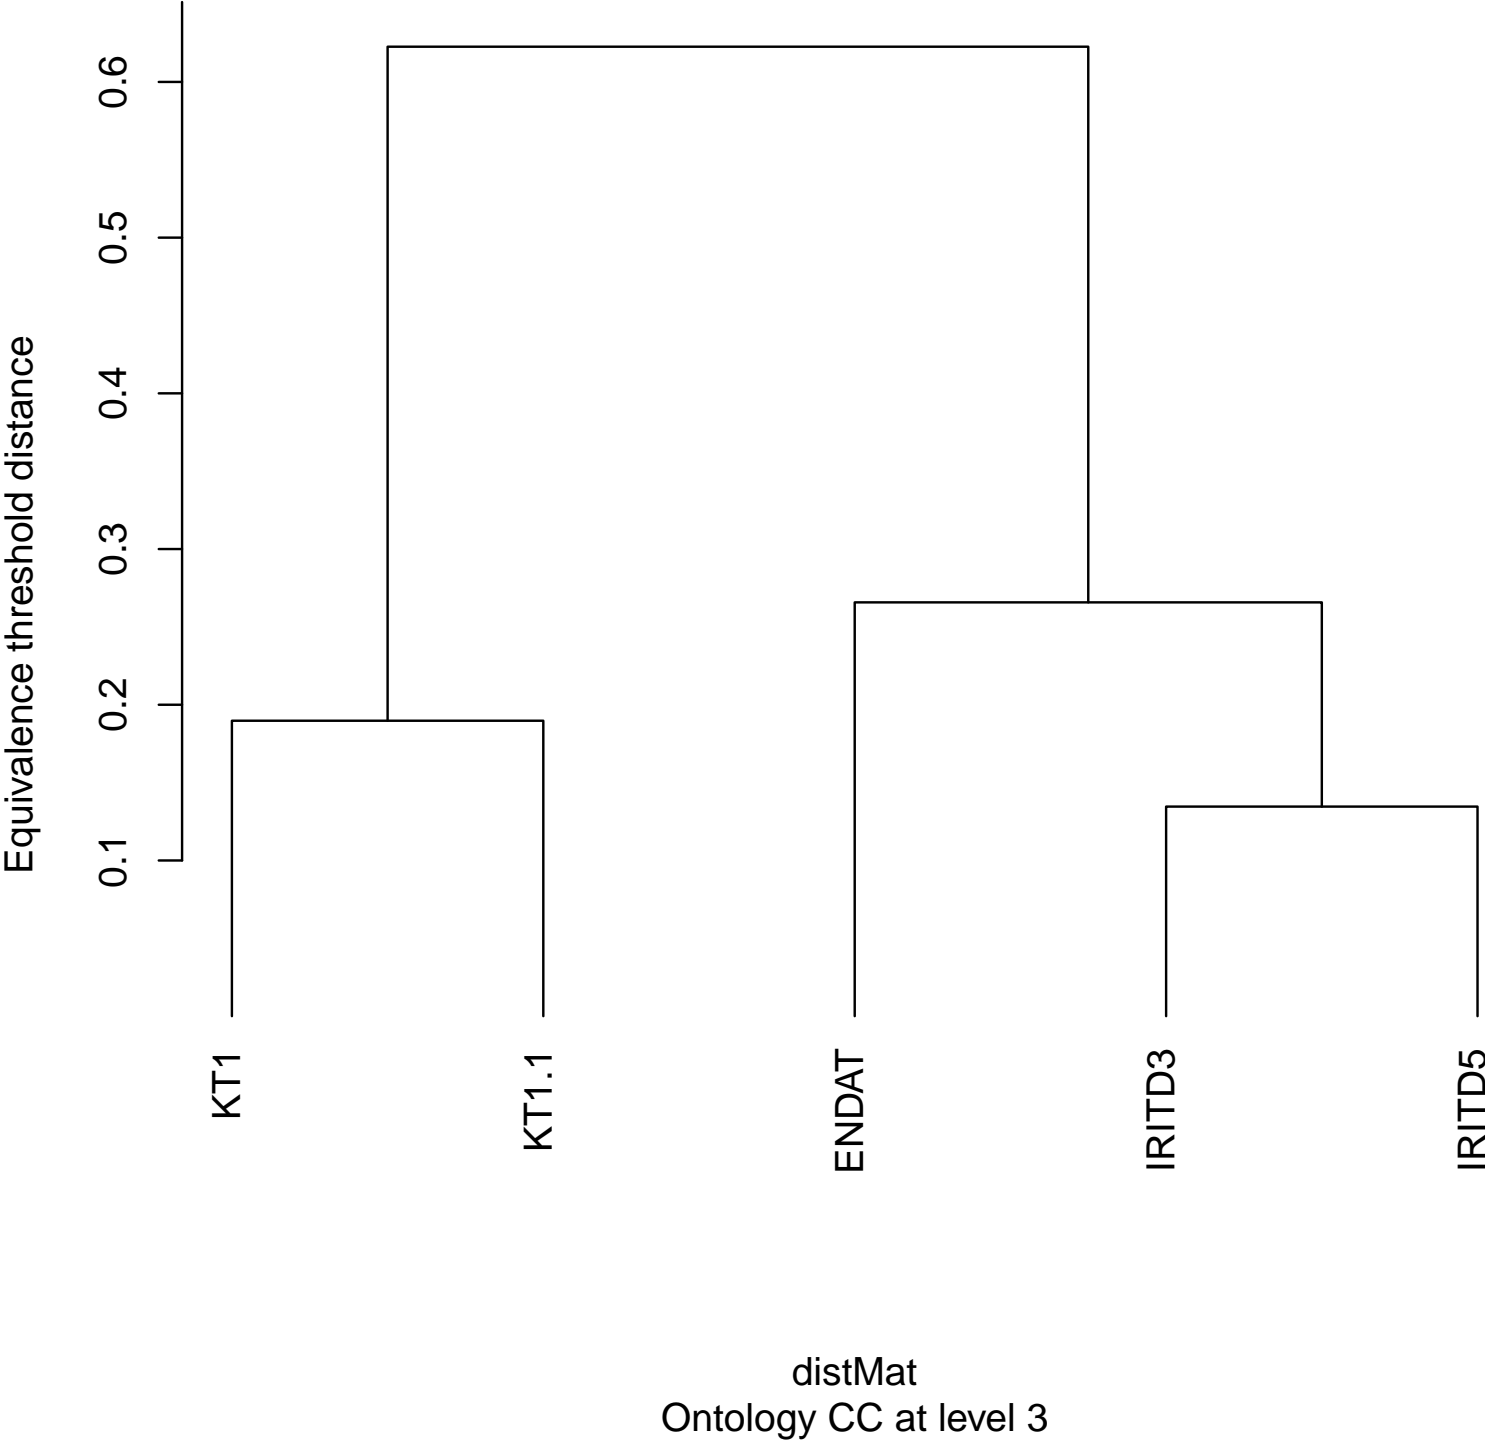

# Kidney\_rejection\_gene\_lists\_Equivalence\_method

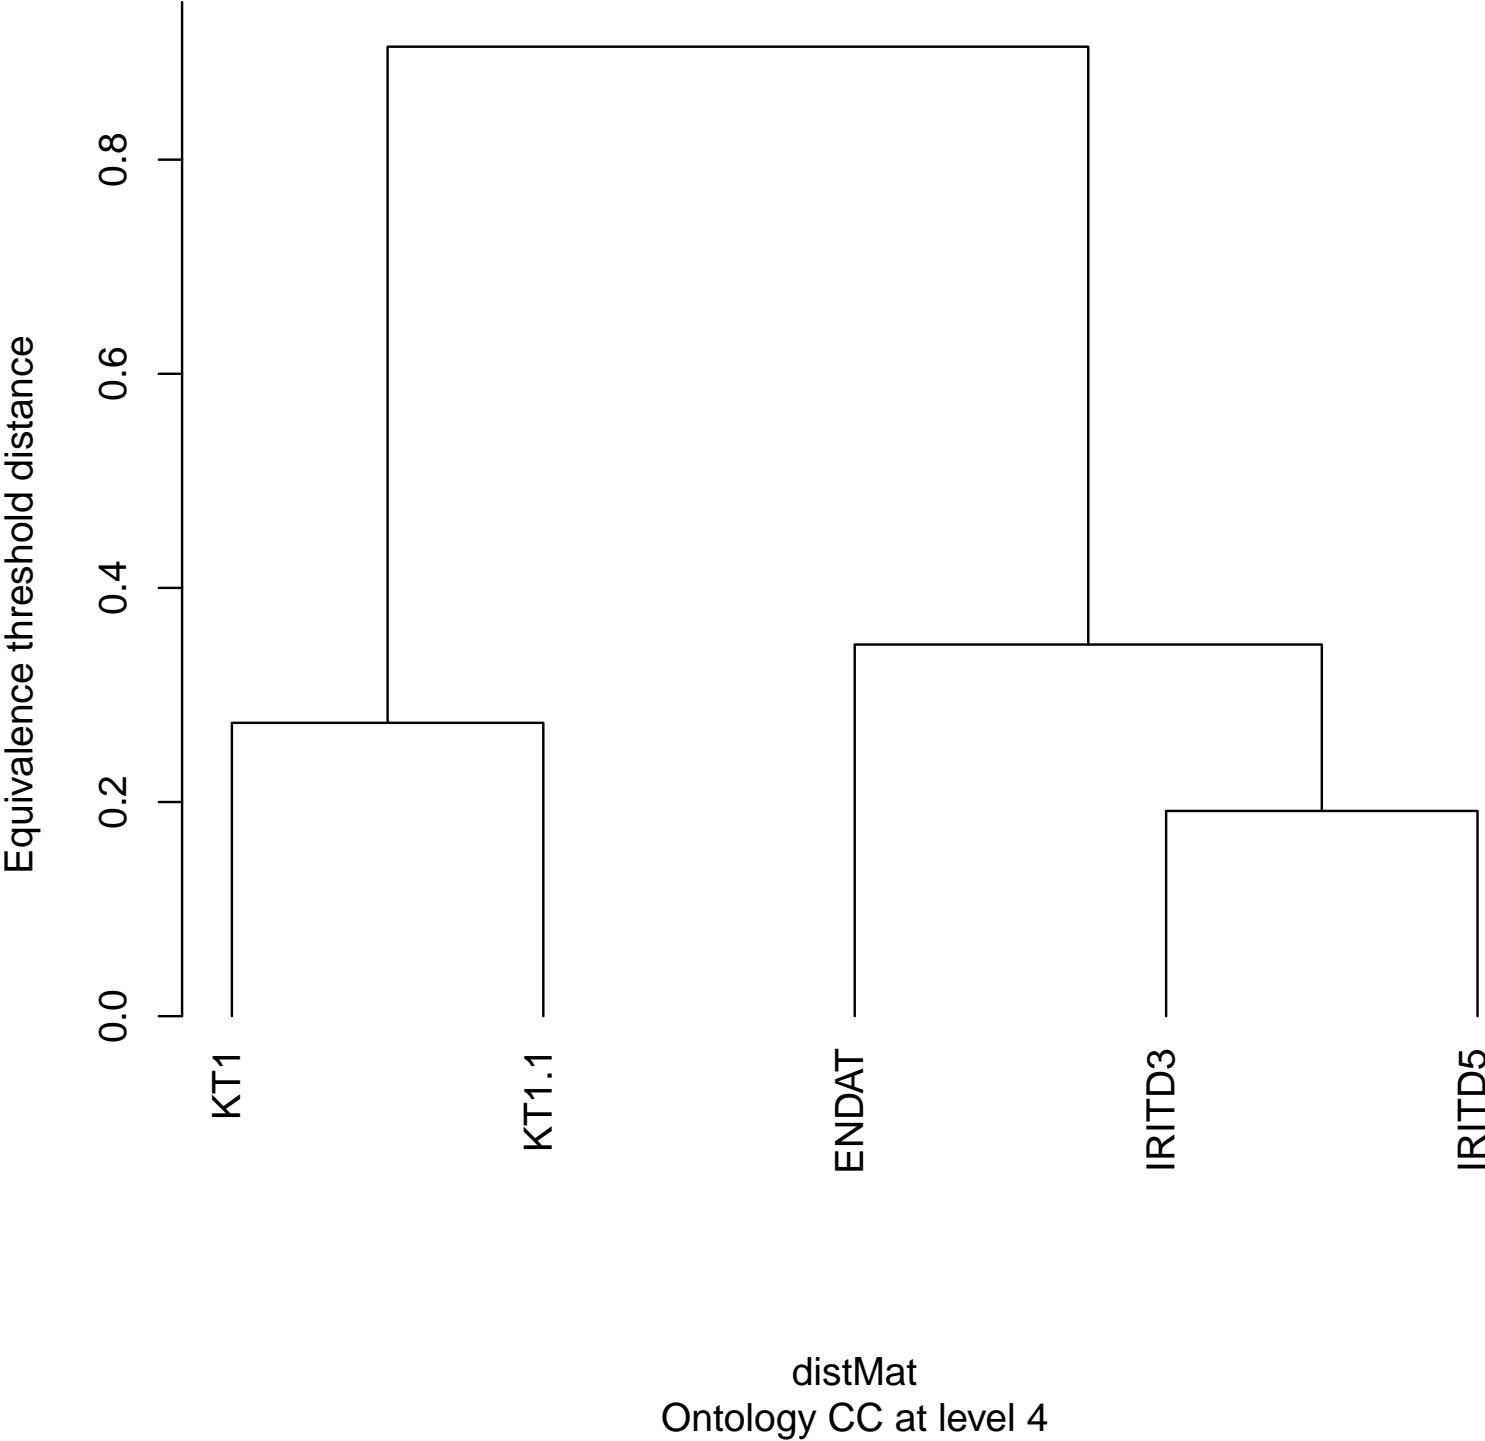

distMat  
Ontology CC at level 4

# Kidney\_rejection\_gene\_lists\_Equivalence\_method

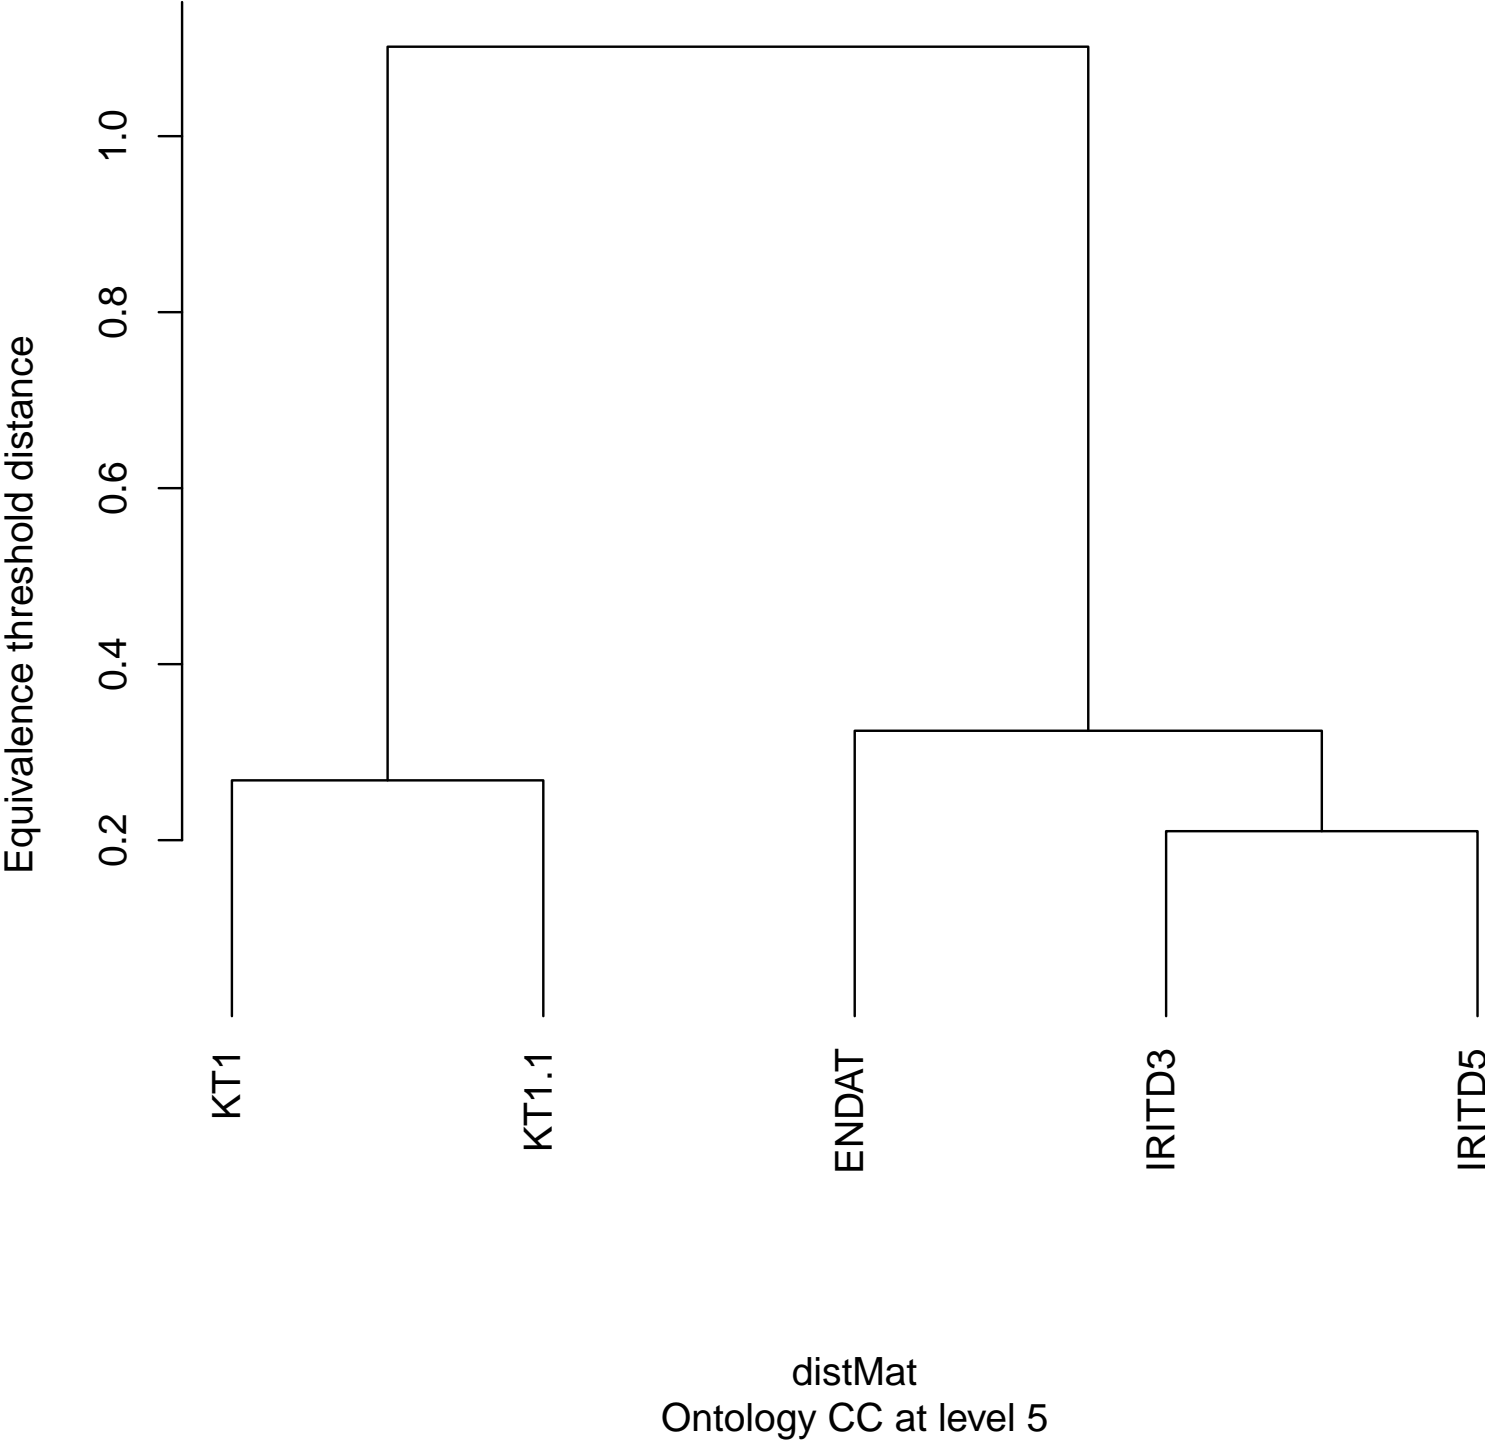

# Kidney\_rejection\_gene\_lists\_Equivalence\_method

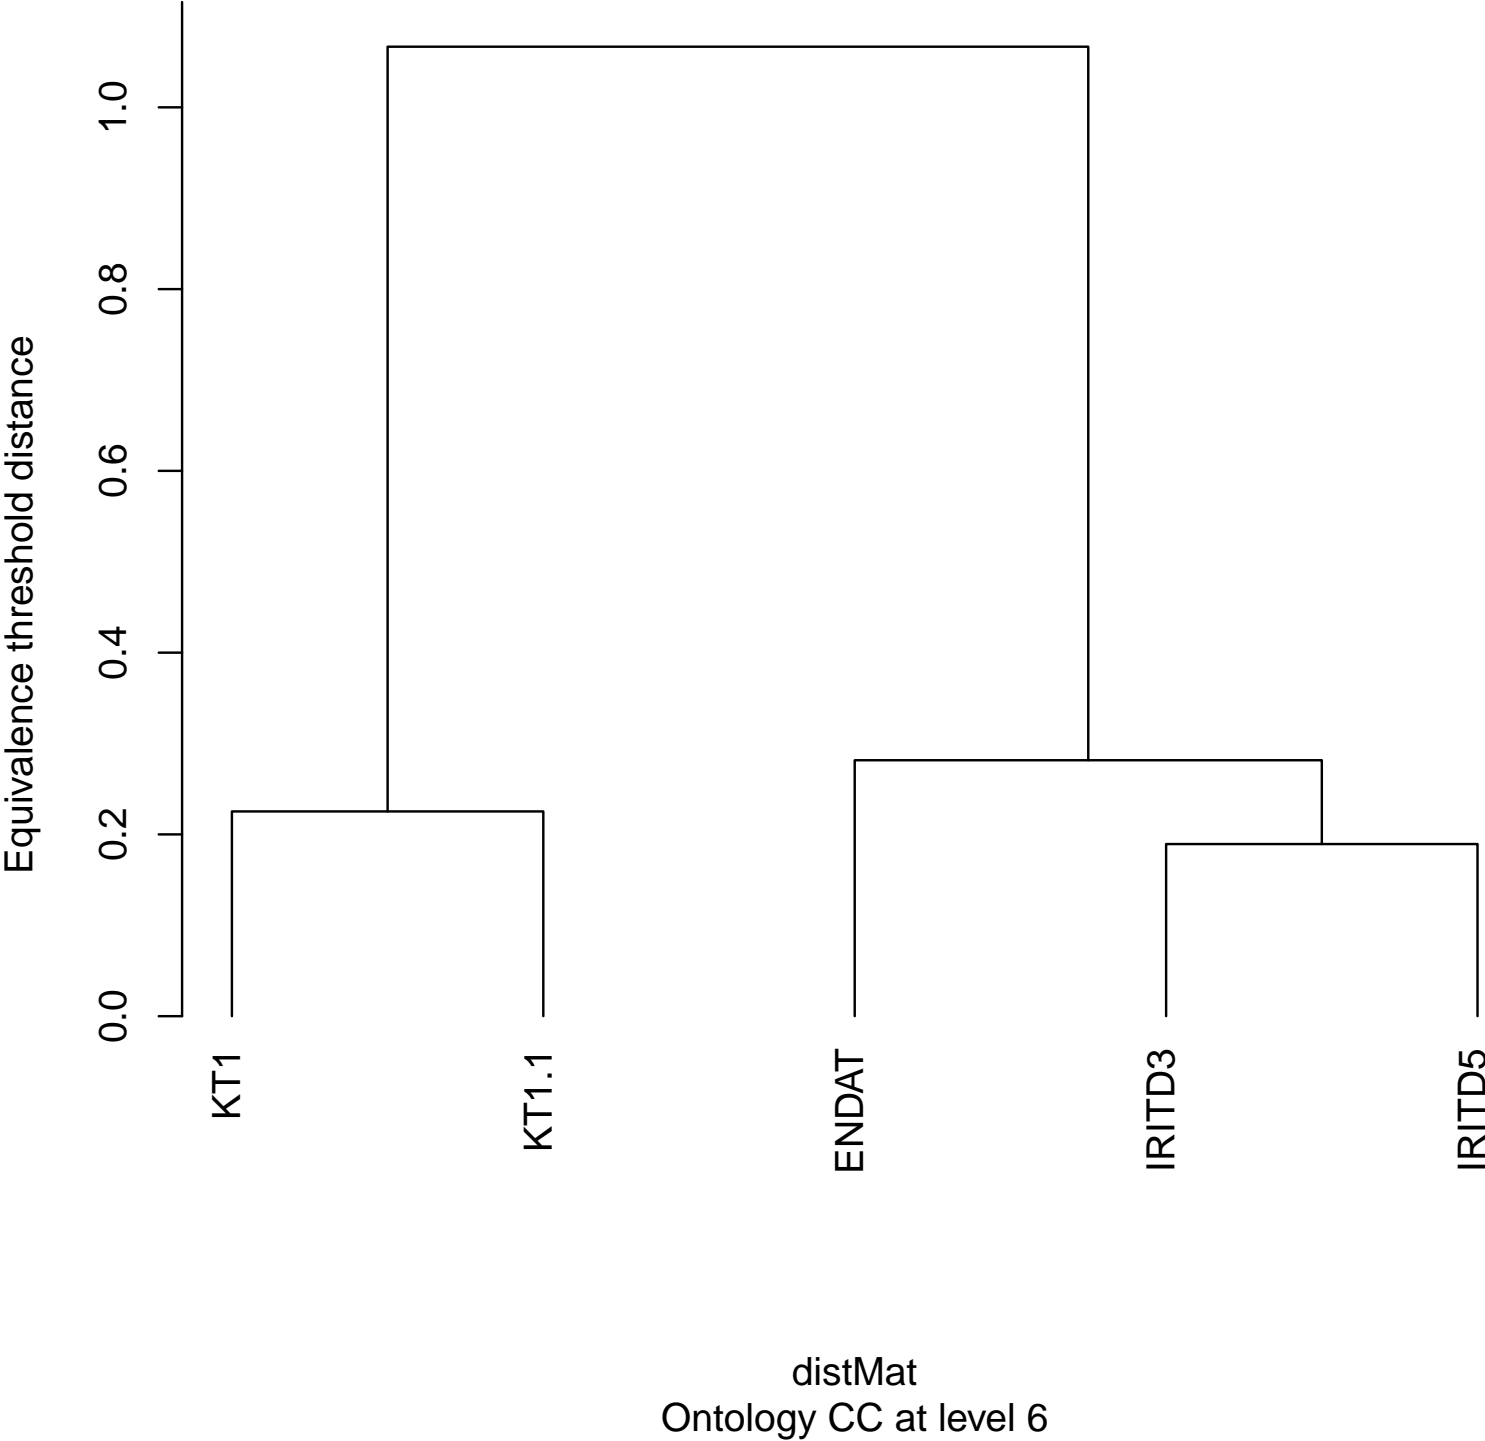



# Kidney\_rejection\_gene\_lists\_Equivalence\_method

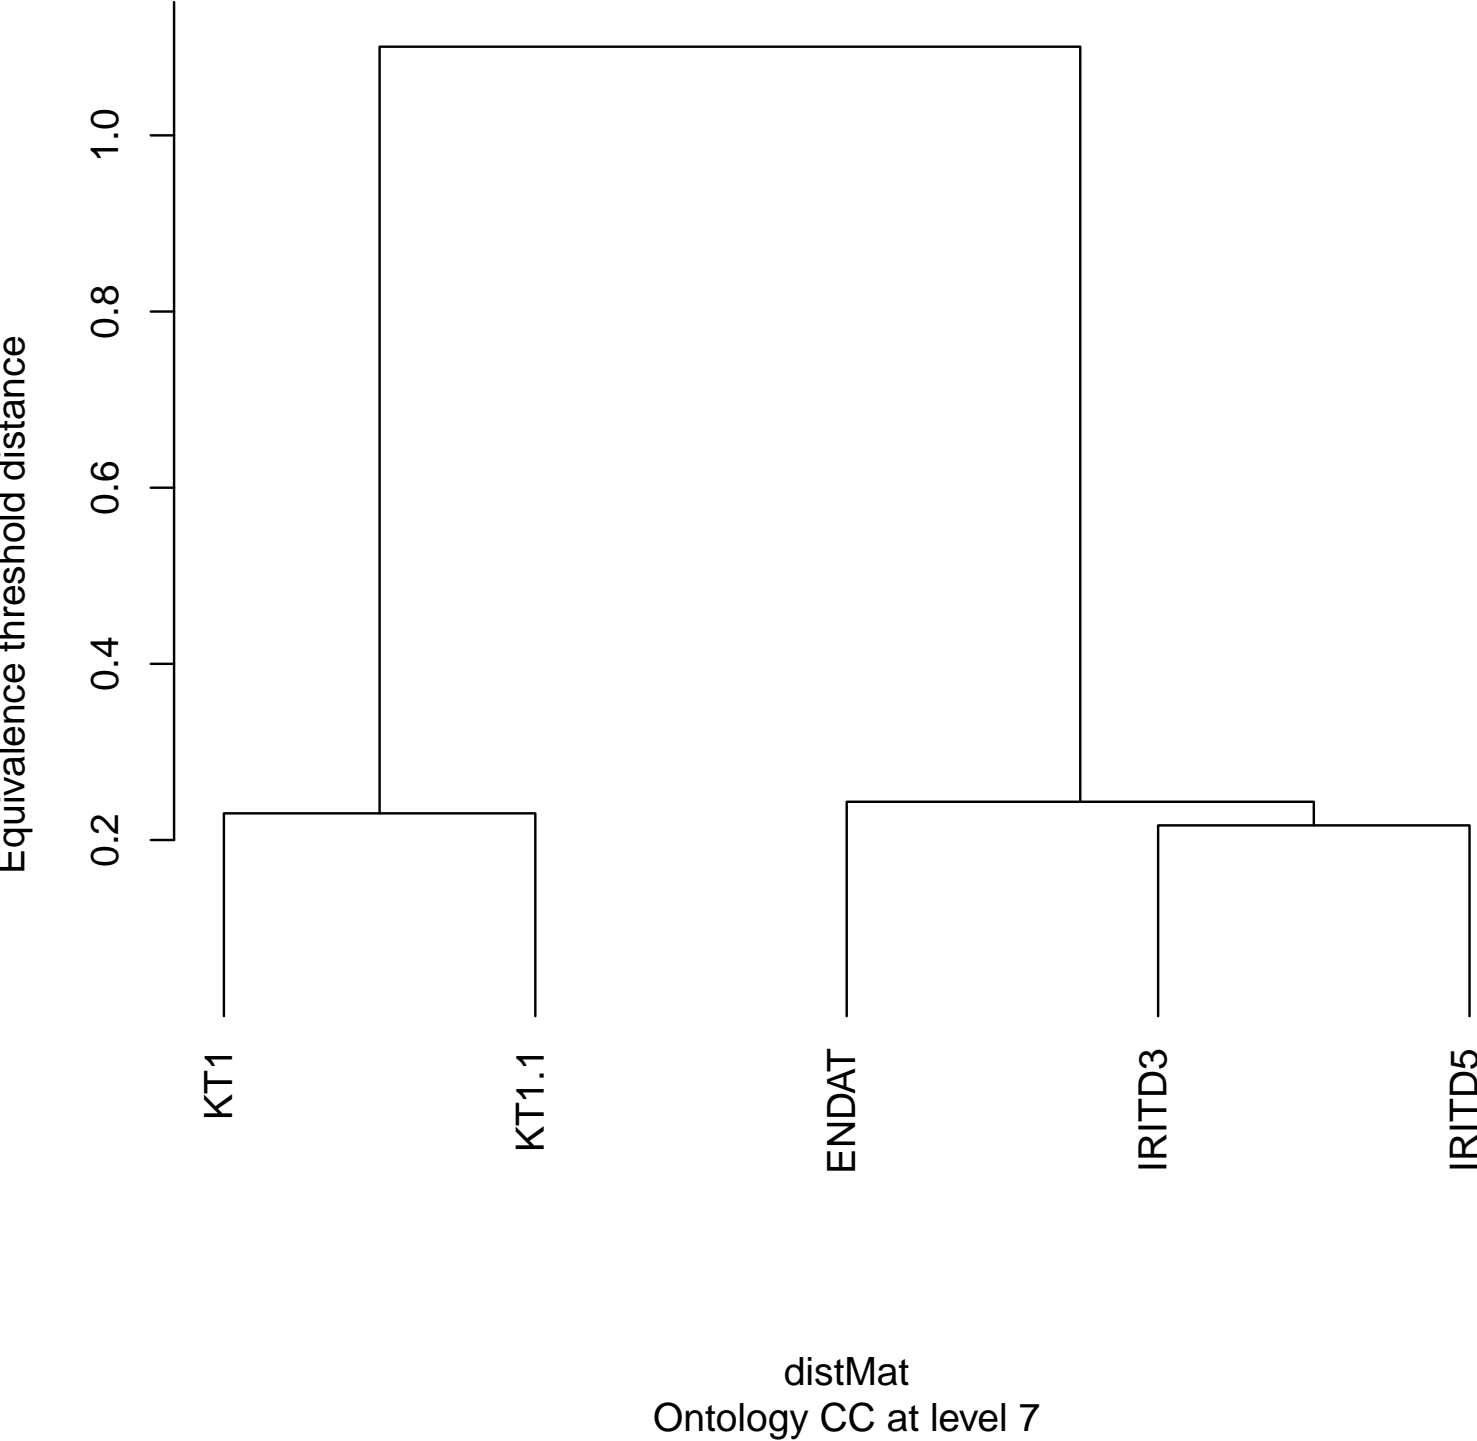

distMat  
Ontology CC at level 7

# Kidney\_rejection\_gene\_lists\_Equivalence\_method

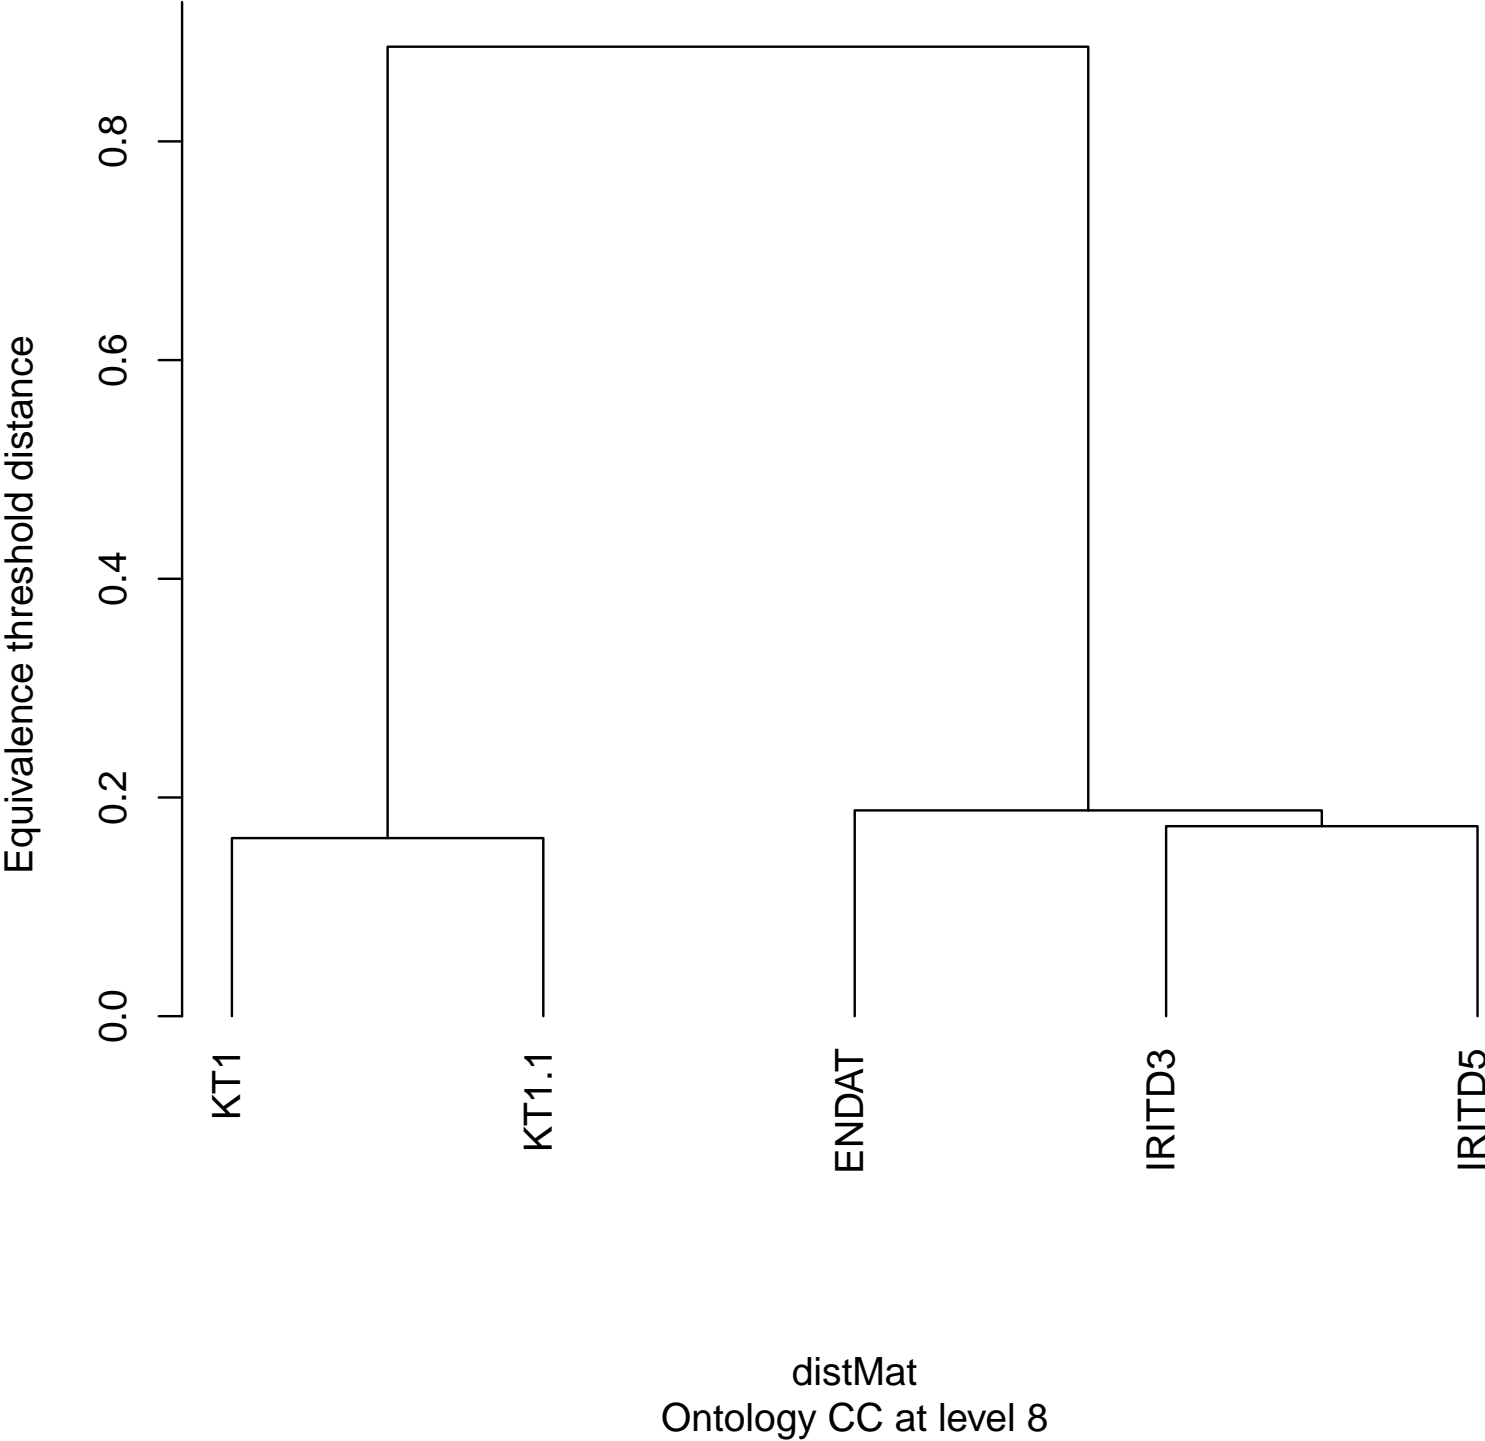

**KIDNEY TRANSPLANTATION REJECTION LISTS**

Number of GO annotated genes for each list, ontology and GO level

**GO level 2**

|    | ENDAT | IRITD3 | IRITD5 | KT1 | KT1.1 |
|----|-------|--------|--------|-----|-------|
| MF | 108   | 290    | 195    | 515 | 112   |
| BP | 112   | 285    | 200    | 506 | 113   |
| CC | 114   | 302    | 204    | 536 | 117   |

**GO level 3**

|    | ENDAT | IRITD3 | IRITD5 | KT1 | KT1.1 |
|----|-------|--------|--------|-----|-------|
| MF | 106   | 280    | 187    | 504 | 110   |
| BP | 112   | 283    | 200    | 508 | 113   |
| CC | 113   | 299    | 204    | 533 | 116   |

**GO level 4**

|    | ENDAT | IRITD3 | IRITD5 | KT1 | KT1.1 |
|----|-------|--------|--------|-----|-------|
| MF | 101   | 265    | 185    | 482 | 108   |
| BP | 112   | 284    | 198    | 495 | 108   |
| CC | 113   | 299    | 204    | 533 | 116   |

**GO level 5**

|    | ENDAT | IRITD3 | IRITD5 | KT1 | KT1.1 |
|----|-------|--------|--------|-----|-------|
| MF | 100   | 248    | 179    | 463 | 106   |
| BP | 111   | 283    | 199    | 502 | 112   |
| CC | 113   | 298    | 204    | 527 | 116   |

**GO level 6**

|    | ENDAT | IRITD3 | IRITD5 | KT1 | KT1.1 |
|----|-------|--------|--------|-----|-------|
| MF | 87    | 207    | 144    | 424 | 99    |
| BP | 112   | 282    | 196    | 498 | 110   |
| CC | 107   | 287    | 192    | 498 | 111   |

**GO level 7**

|    | ENDAT | IRITD3 | IRITD5 | KT1 | KT1.1 |
|----|-------|--------|--------|-----|-------|
| MF | 57    | 149    | 93     | 296 | 71    |
| BP | 108   | 271    | 190    | 484 | 106   |
| CC | 99    | 274    | 172    | 459 | 103   |

**GO level 8**

|    | ENDAT | IRITD3 | IRITD5 | KT1 | KT1.1 |
|----|-------|--------|--------|-----|-------|
| MF | 45    | 96     | 58     | 190 | 37    |
| BP | 107   | 261    | 184    | 461 | 104   |
| CC | 98    | 270    | 171    | 457 | 102   |

**GO level 9**

|    | ENDAT | IRITD3 | IRITD5 | KT1 | KT1.1 |
|----|-------|--------|--------|-----|-------|
| MF | 36    | 74     | 45     | 142 | 23    |
| BP | 99    | 249    | 178    | 424 | 96    |
| CC | 79    | 199    | 142    | 308 | 67    |

**GO level 10**

|    | ENDAT | IRITD3 | IRITD5 | KT1 | KT1.1 |
|----|-------|--------|--------|-----|-------|
| MF | 15    | 25     | 18     | 59  | 9     |
| BP | 92    | 231    | 160    | 371 | 81    |
| CC | 74    | 186    | 138    | 281 | 66    |

**GO level 11**

|    | ENDAT | IRITD3 | IRITD5 | KT1 | KT1.1 |
|----|-------|--------|--------|-----|-------|
| MF | 2     | 10     | 3      | 28  | 3     |
| BP | 86    | 196    | 133    | 312 | 66    |
| CC | 61    | 158    | 110    | 204 | 46    |

**GO level 12**

|    | ENDAT | IRITD3 | IRITD5 | KT1 | KT1.1 |
|----|-------|--------|--------|-----|-------|
| MF | 0     | 3      | 0      | 15  | 2     |
| BP | 77    | 165    | 113    | 228 | 38    |
| CC | 37    | 89     | 71     | 98  | 18    |

| <b>GO level 13</b> |       |        |        |     |       |
|--------------------|-------|--------|--------|-----|-------|
|                    | ENDAT | IRITD3 | IRITD5 | KT1 | KT1.1 |
| MF                 | 0     | 1      | 0      | 5   | 0     |
| BP                 | 68    | 136    | 88     | 152 | 27    |
| CC                 | 14    | 37     | 33     | 29  | 4     |
| <b>GO level 14</b> |       |        |        |     |       |
|                    | ENDAT | IRITD3 | IRITD5 | KT1 | KT1.1 |
| MF                 | 0     | 1      | 0      | 4   | 0     |
| BP                 | 36    | 67     | 51     | 70  | 14    |
| CC                 | 7     | 10     | 11     | 10  | 0     |
| <b>GO level 15</b> |       |        |        |     |       |
|                    | ENDAT | IRITD3 | IRITD5 | KT1 | KT1.1 |
| MF                 | 0     | 0      | 0      | 4   | 0     |
| BP                 | 17    | 30     | 33     | 38  | 7     |
| CC                 | 1     | 2      | 2      | 2   | 0     |
| <b>GO level 16</b> |       |        |        |     |       |
|                    | ENDAT | IRITD3 | IRITD5 | KT1 | KT1.1 |
| MF                 | 0     | 0      | 0      | 0   | 0     |
| BP                 | 5     | 12     | 11     | 15  | 3     |
| CC                 | 1     | 1      | 0      | 0   | 0     |

Semantic similarity methods are also a very interesting approach to analyzing the possible similarity between lists of genes. Despite many coincidences in the pattern of grouping, there is also considerable variability among them. These differences are comparable to those among GO levels in the equivalence method. Here we display the resulting dendrograms (complete method as before) for all semantic similarity methods implemented in R package GOSemSim and for all three GO ontologies.

# Kidney rejection gene lists. Wang method, BP ontology

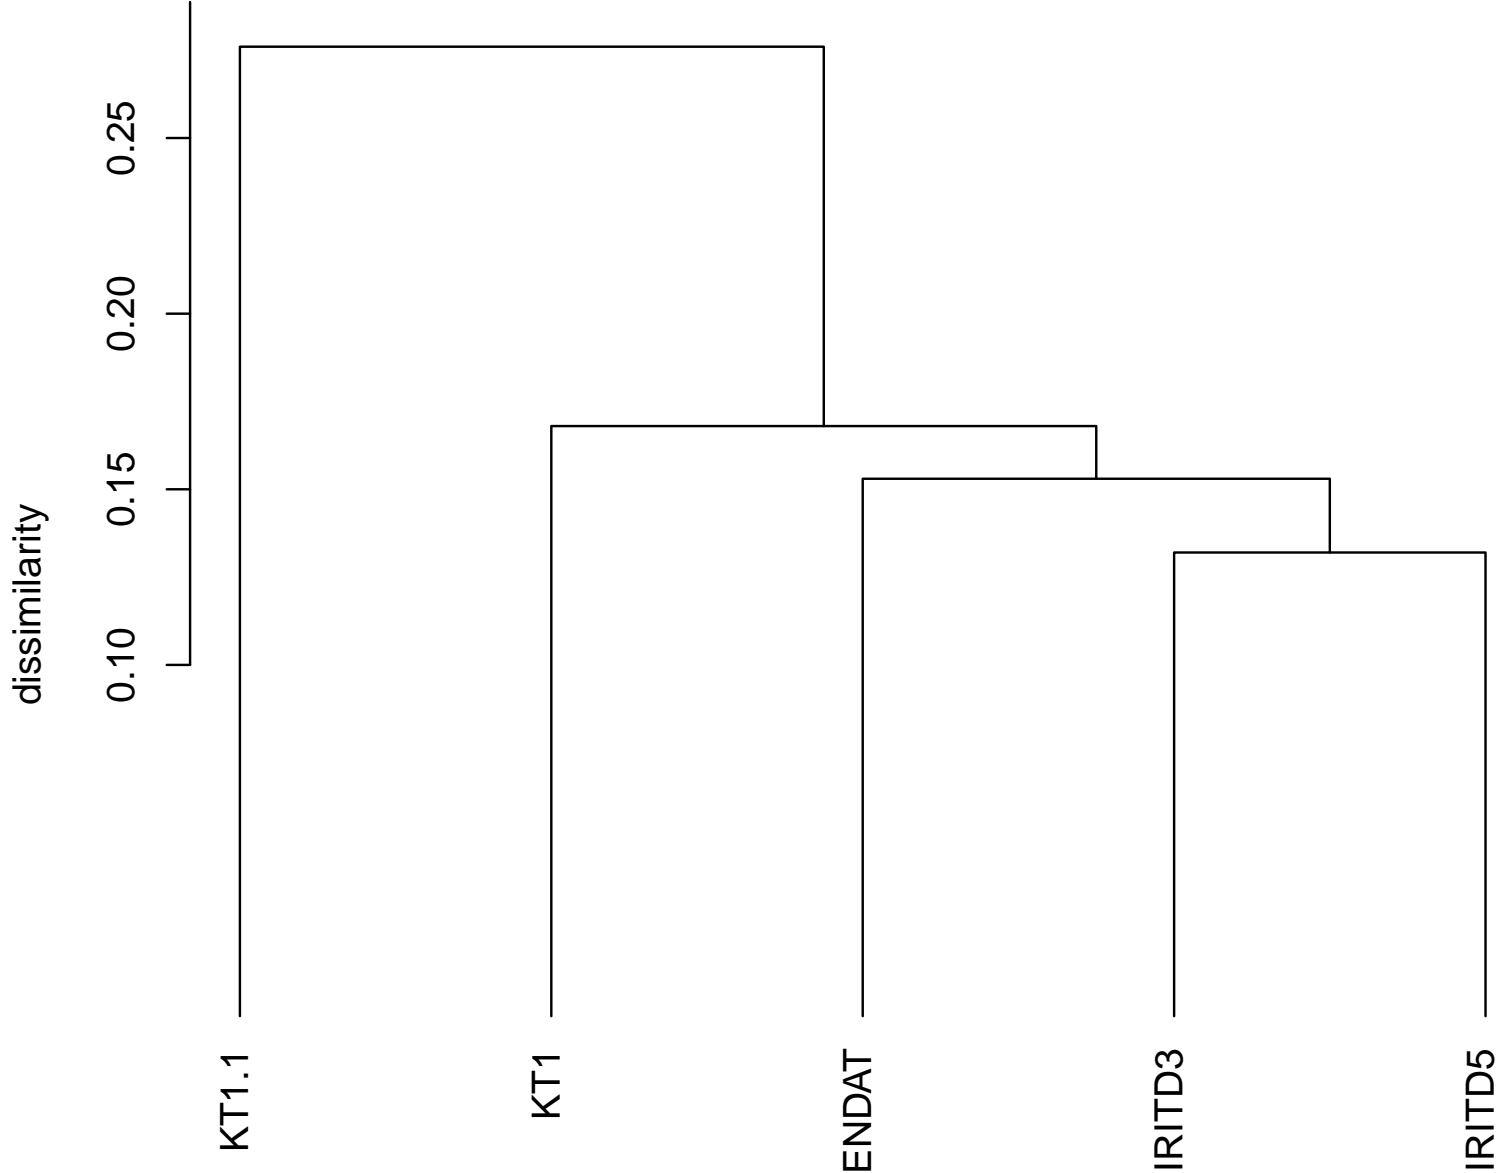

Dendrogram for Wang semantic similarity (method = complete)

# Kidney rejection gene lists. Resnik method, BP ontology

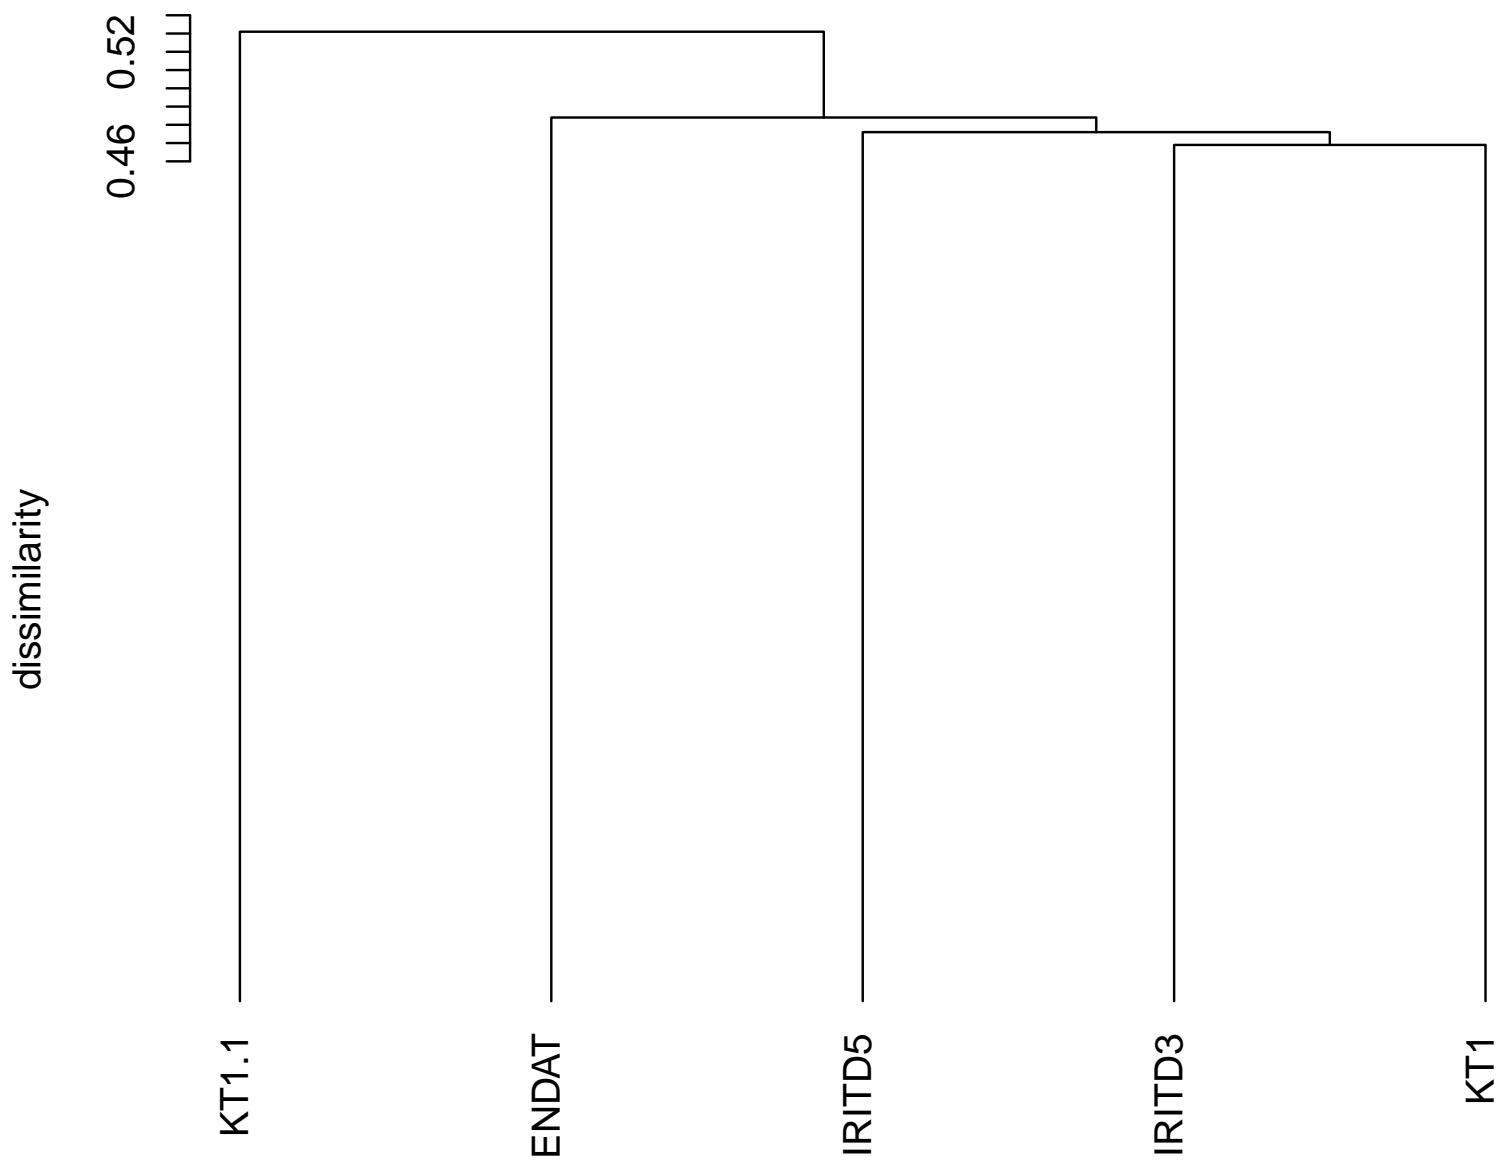

Dendrogram for Resnik semantic similarity  
(method = complete)

# Kidney rejection gene lists. Lin method, BP ontology

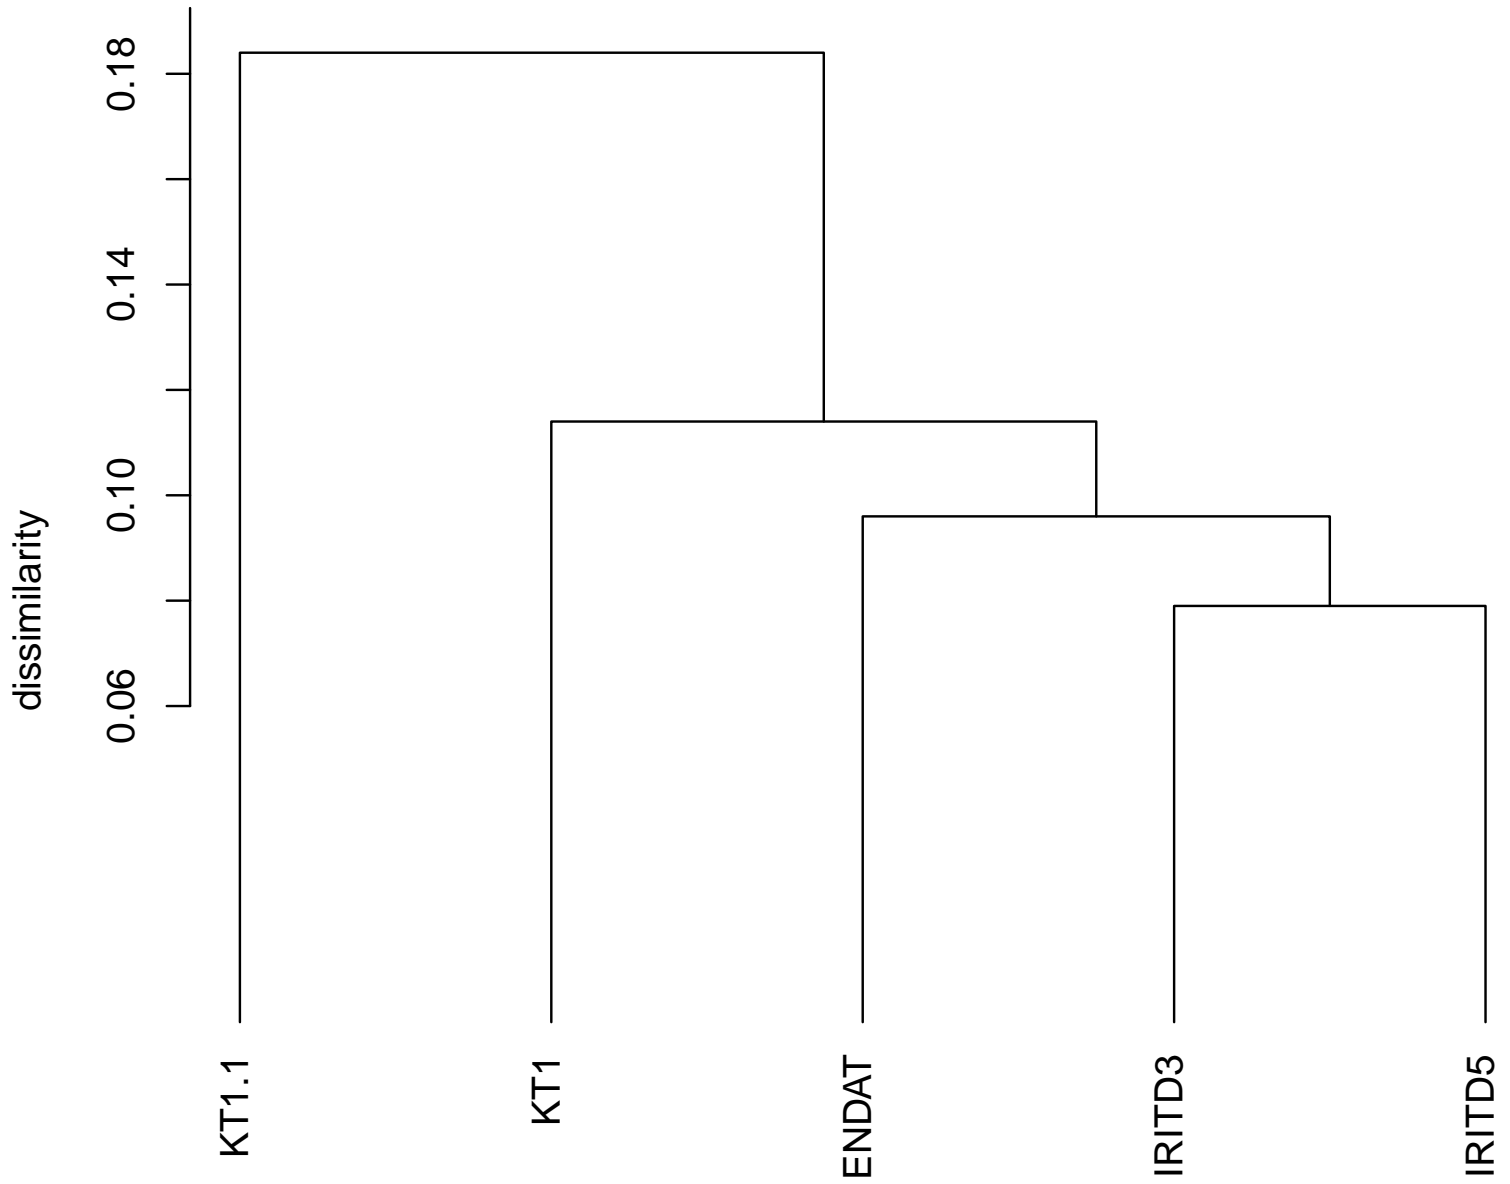

Dendrogram for Lin semantic similarity  
(method = complete)



# Kidney rejection gene lists. Jiang method, BP ontology

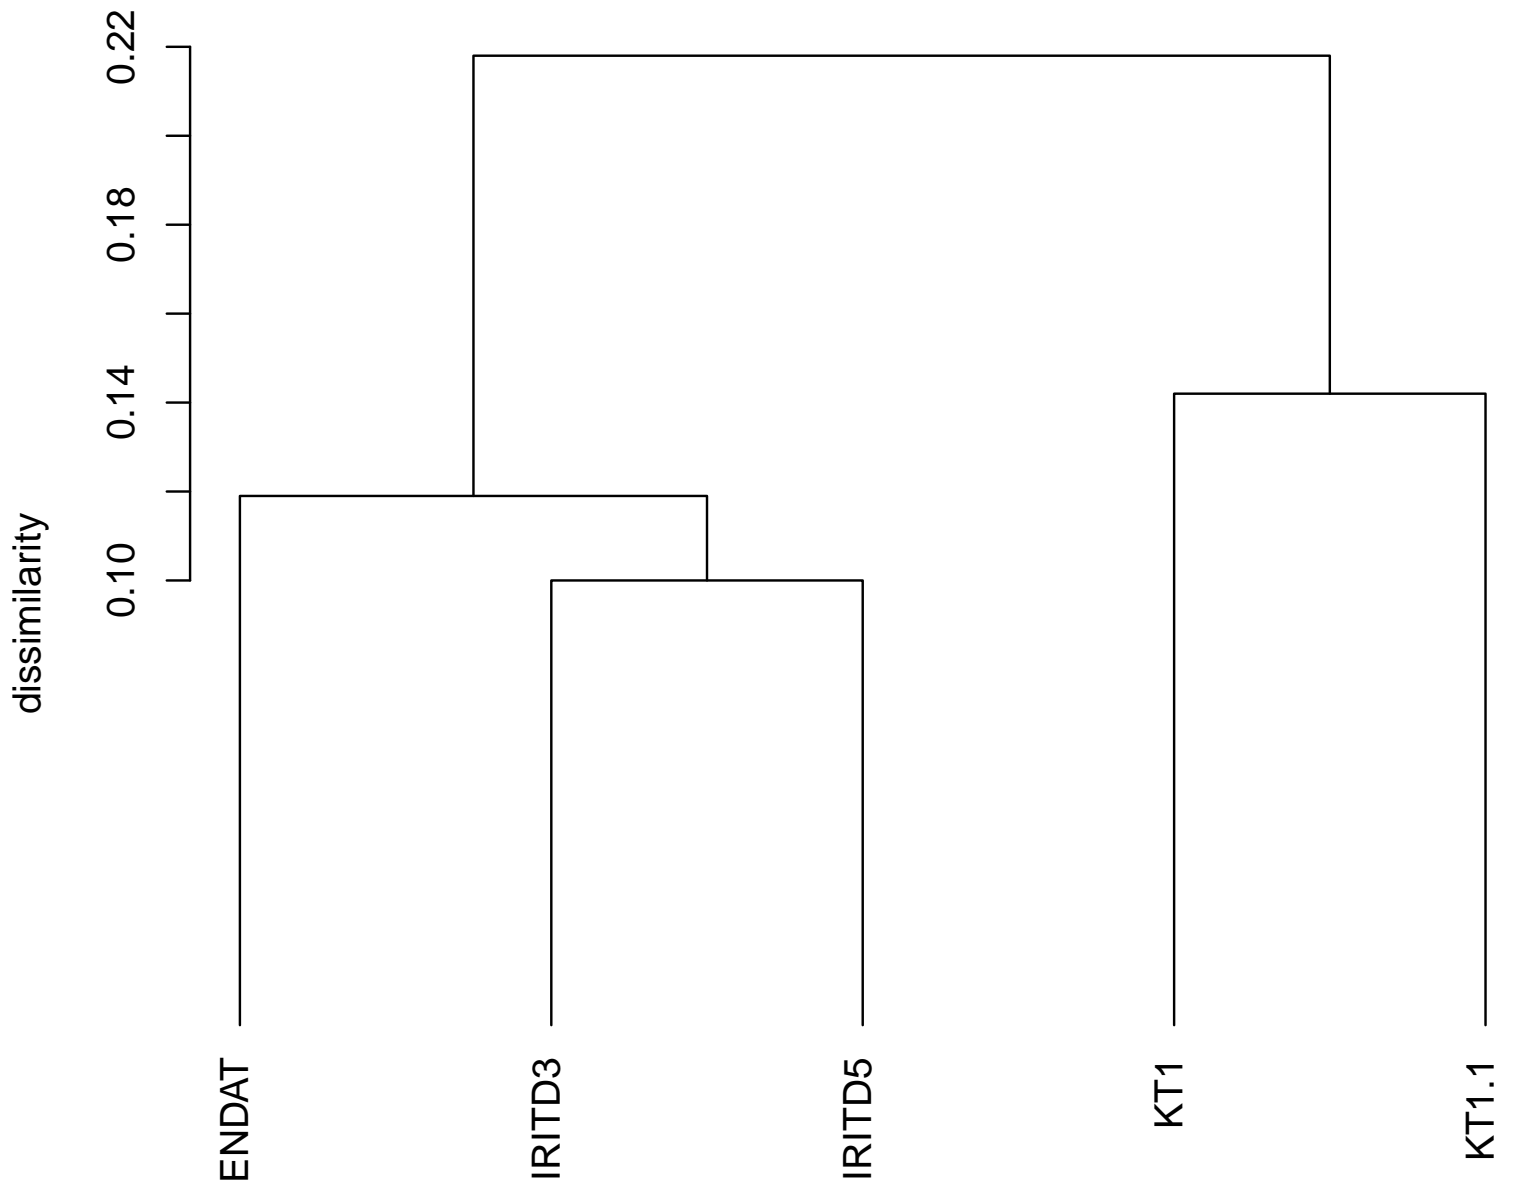

Dendrogram for Jiang semantic similarity  
(method = complete)

# Kidney rejection gene lists. Rel method, BP ontology

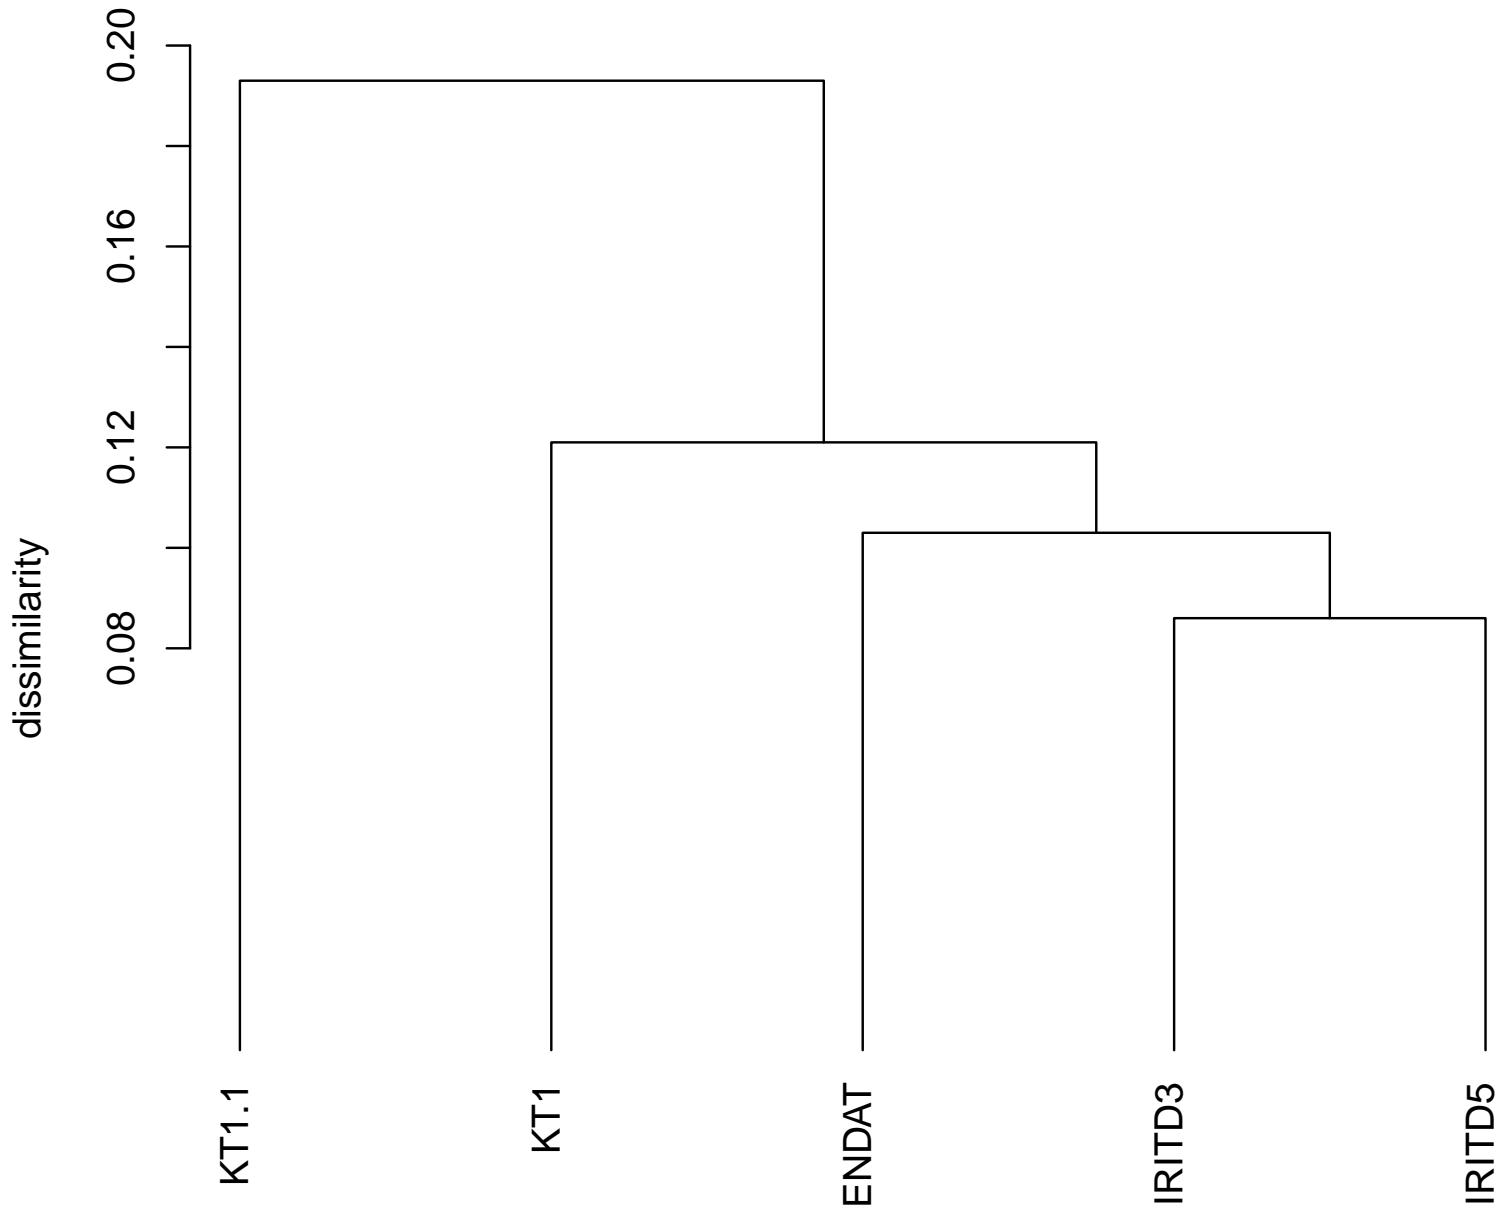

Dendrogram for Rel semantic similarity  
(method = complete)

# Kidney rejection gene lists. Wang method, MF ontology

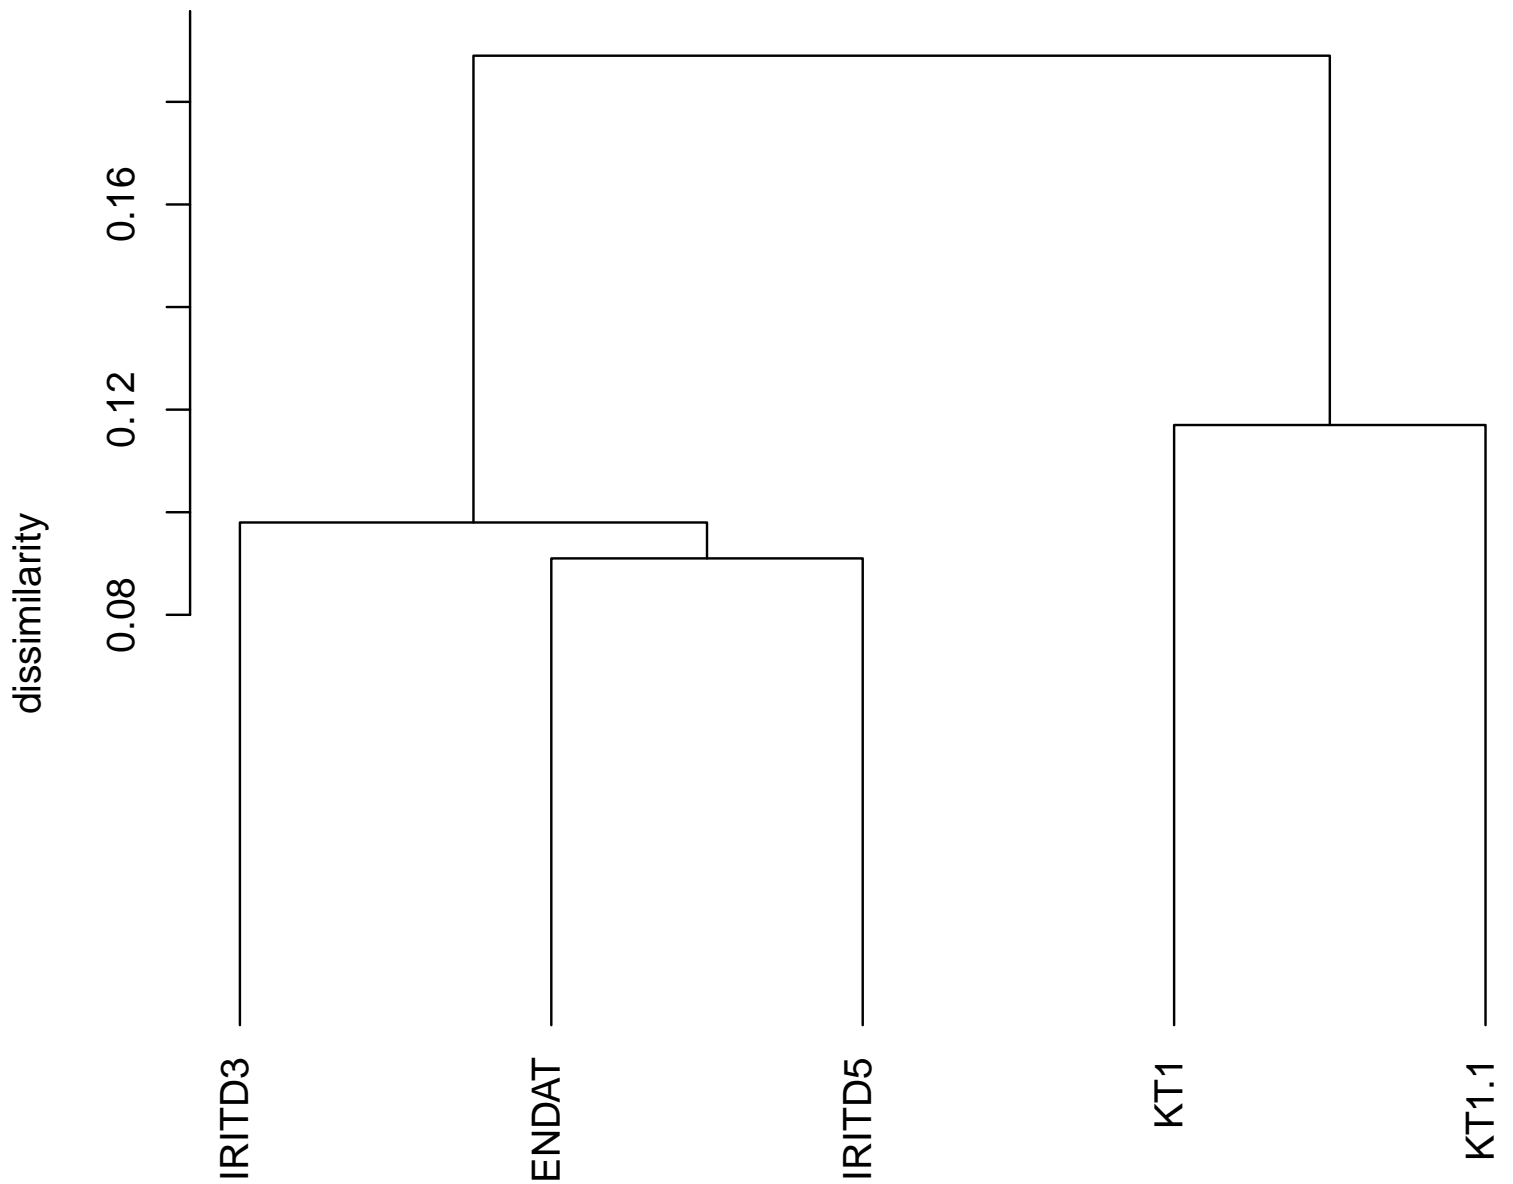

Dendrogram for Wang semantic similarity  
(method = complete)

# Kidney rejection gene lists. Resnik method, MF ontology

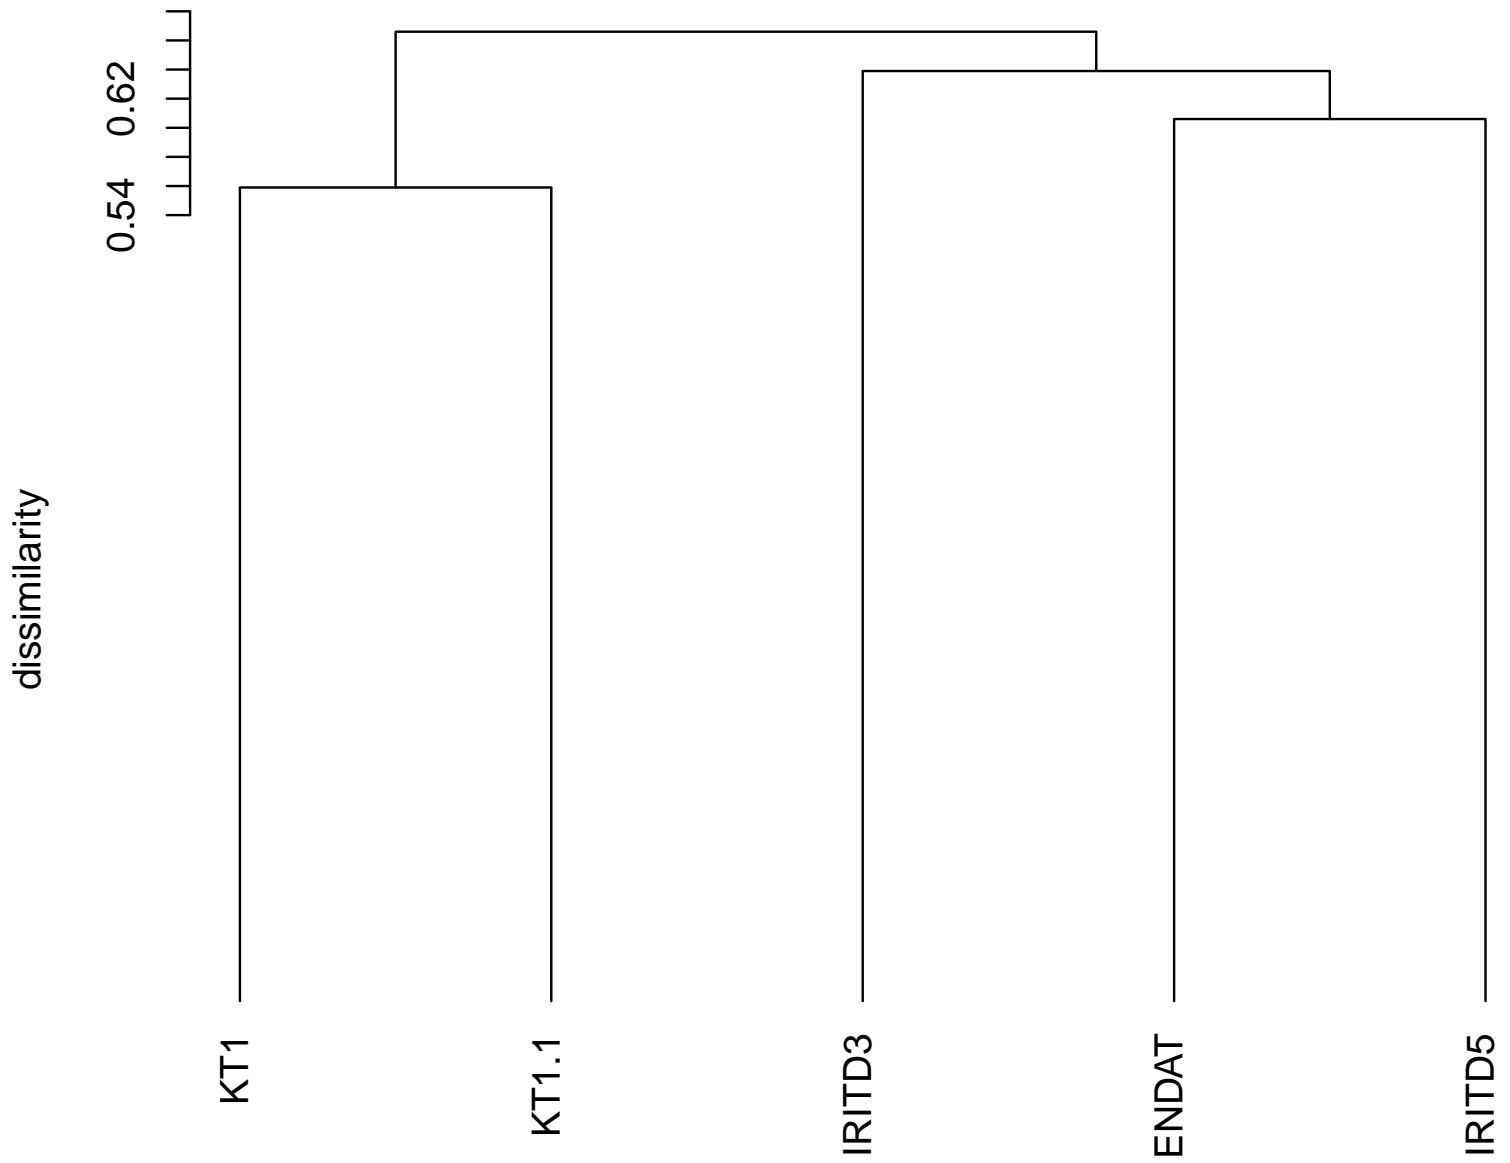

Dendrogram for Resnik semantic similarity  
(method = complete)

# Kidney rejection gene lists. Lin method, MF ontology

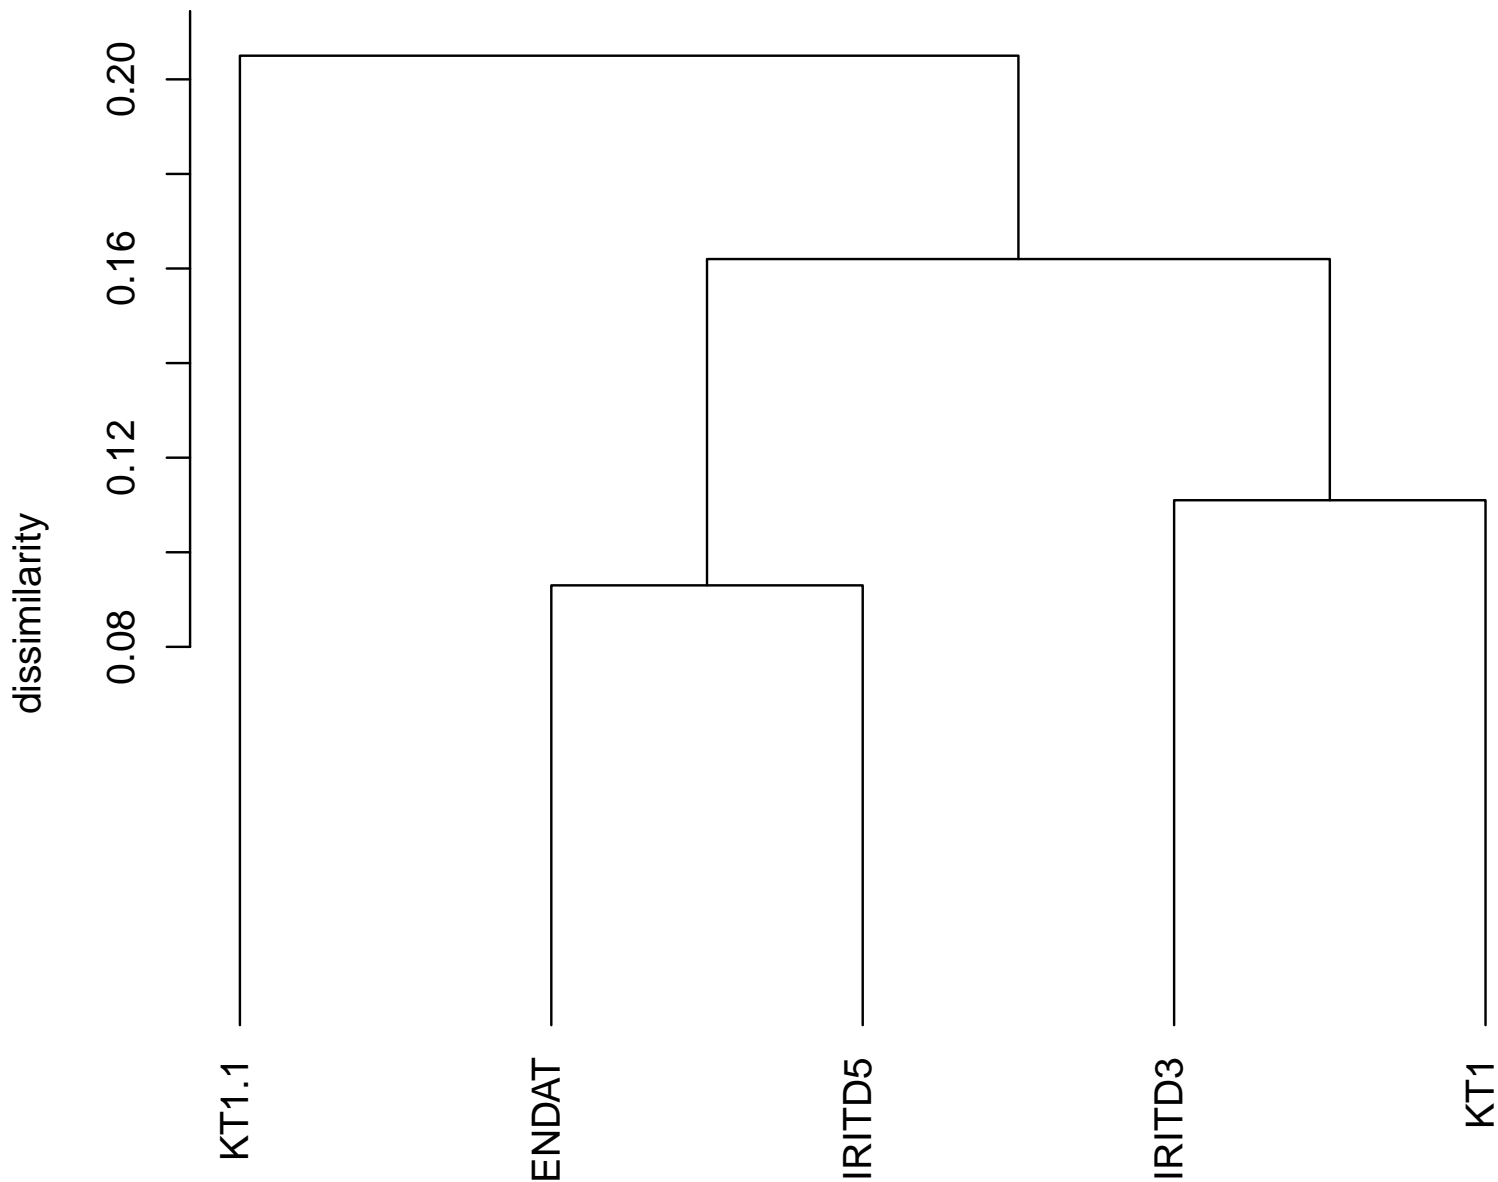

Dendrogram for Lin semantic similarity  
(method = complete)

# Kidney rejection gene lists. Jiang method, MF ontology

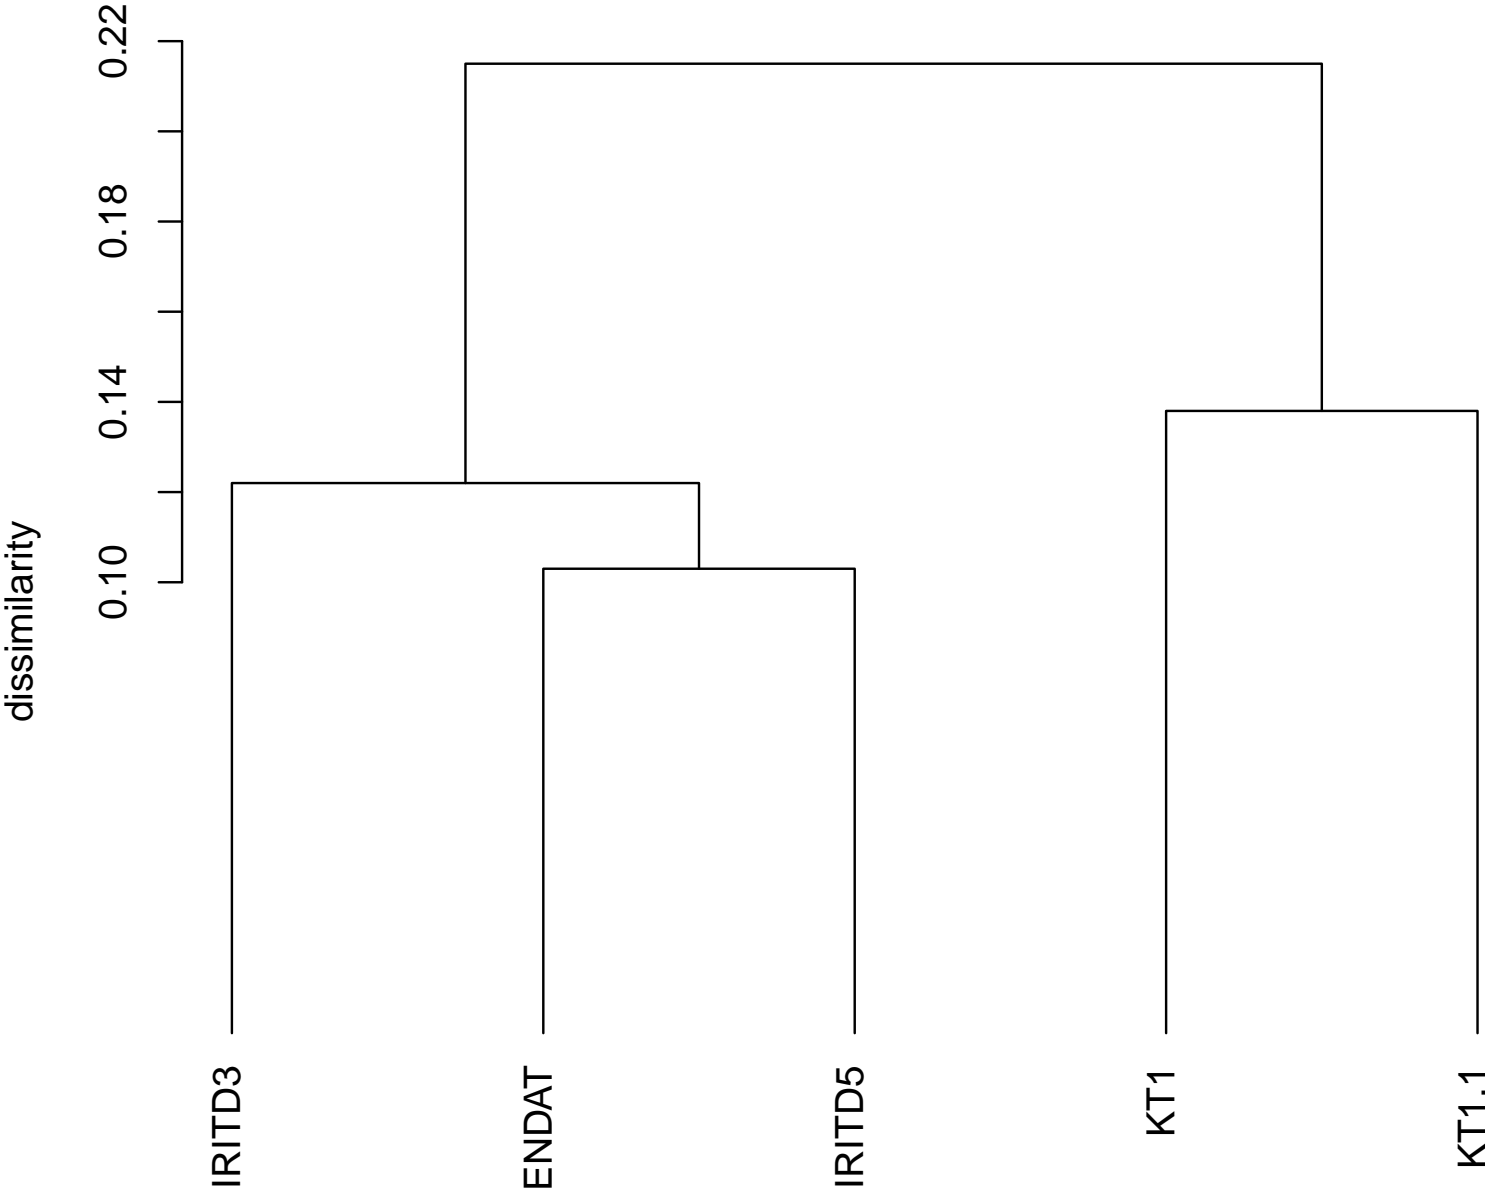

Dendrogram for Jiang semantic similarity (method = complete)

# Kidney rejection gene lists. Rel method, MF ontology

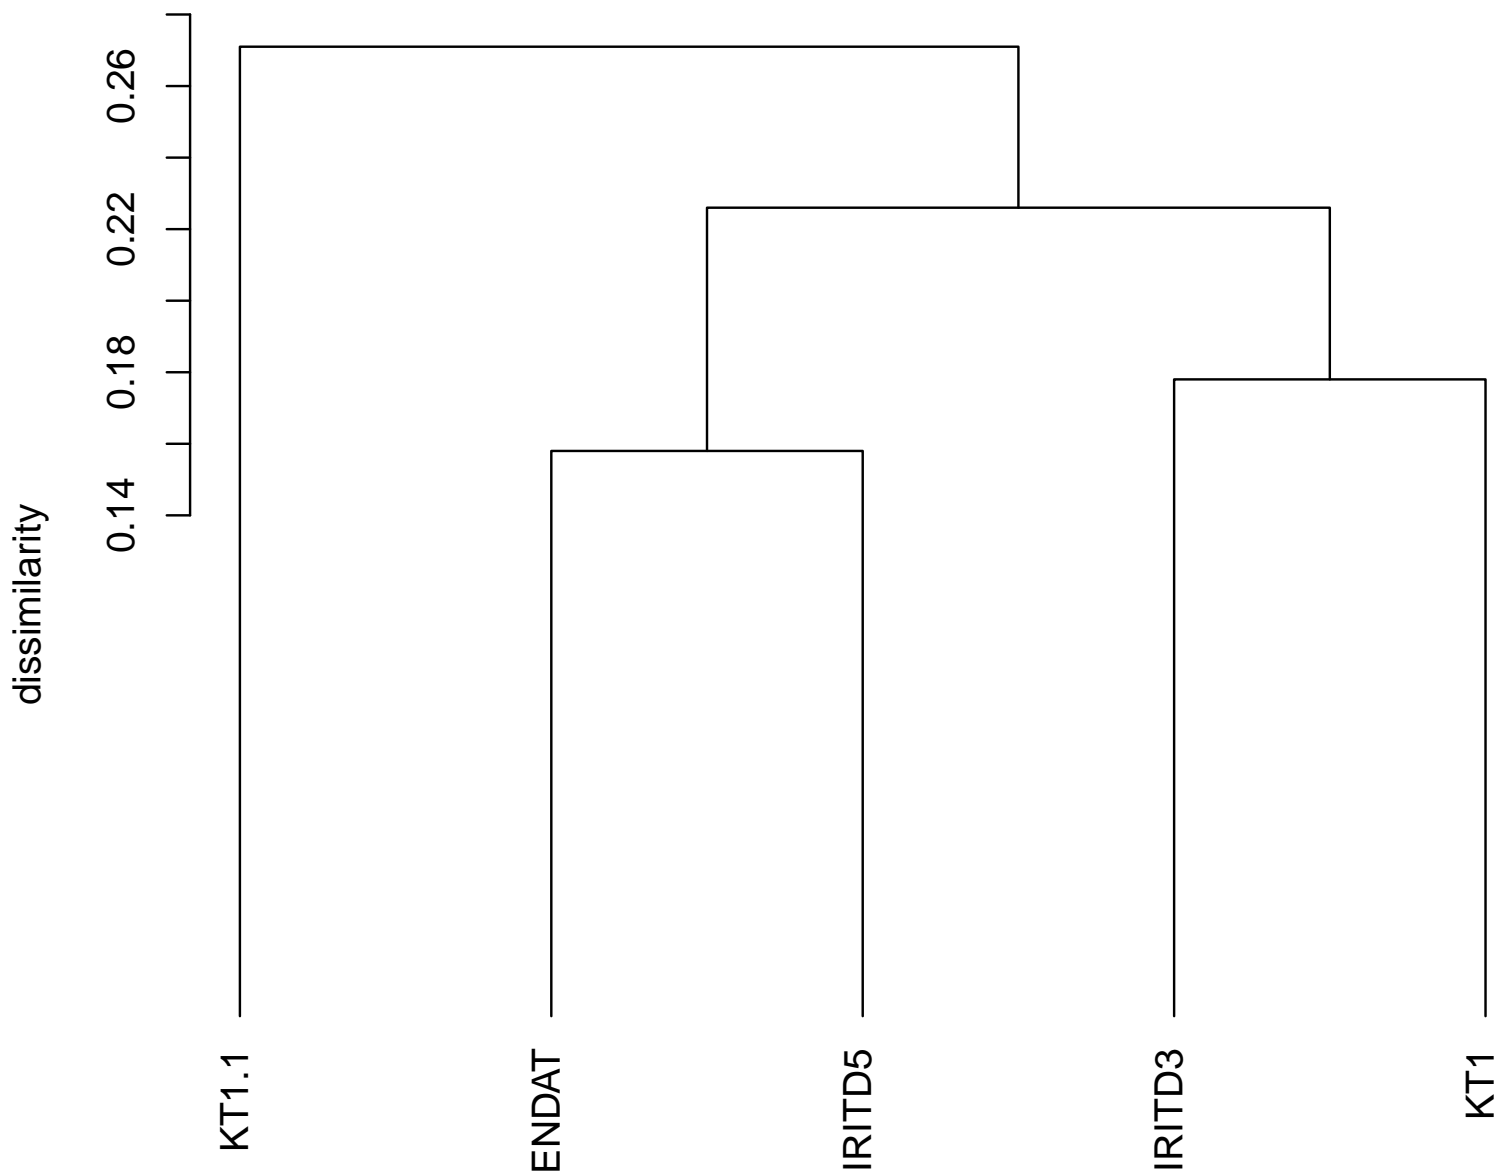

Dendrogram for Rel semantic similarity  
(method = complete)

# Kidney rejection gene lists. Wang method, CC ontology

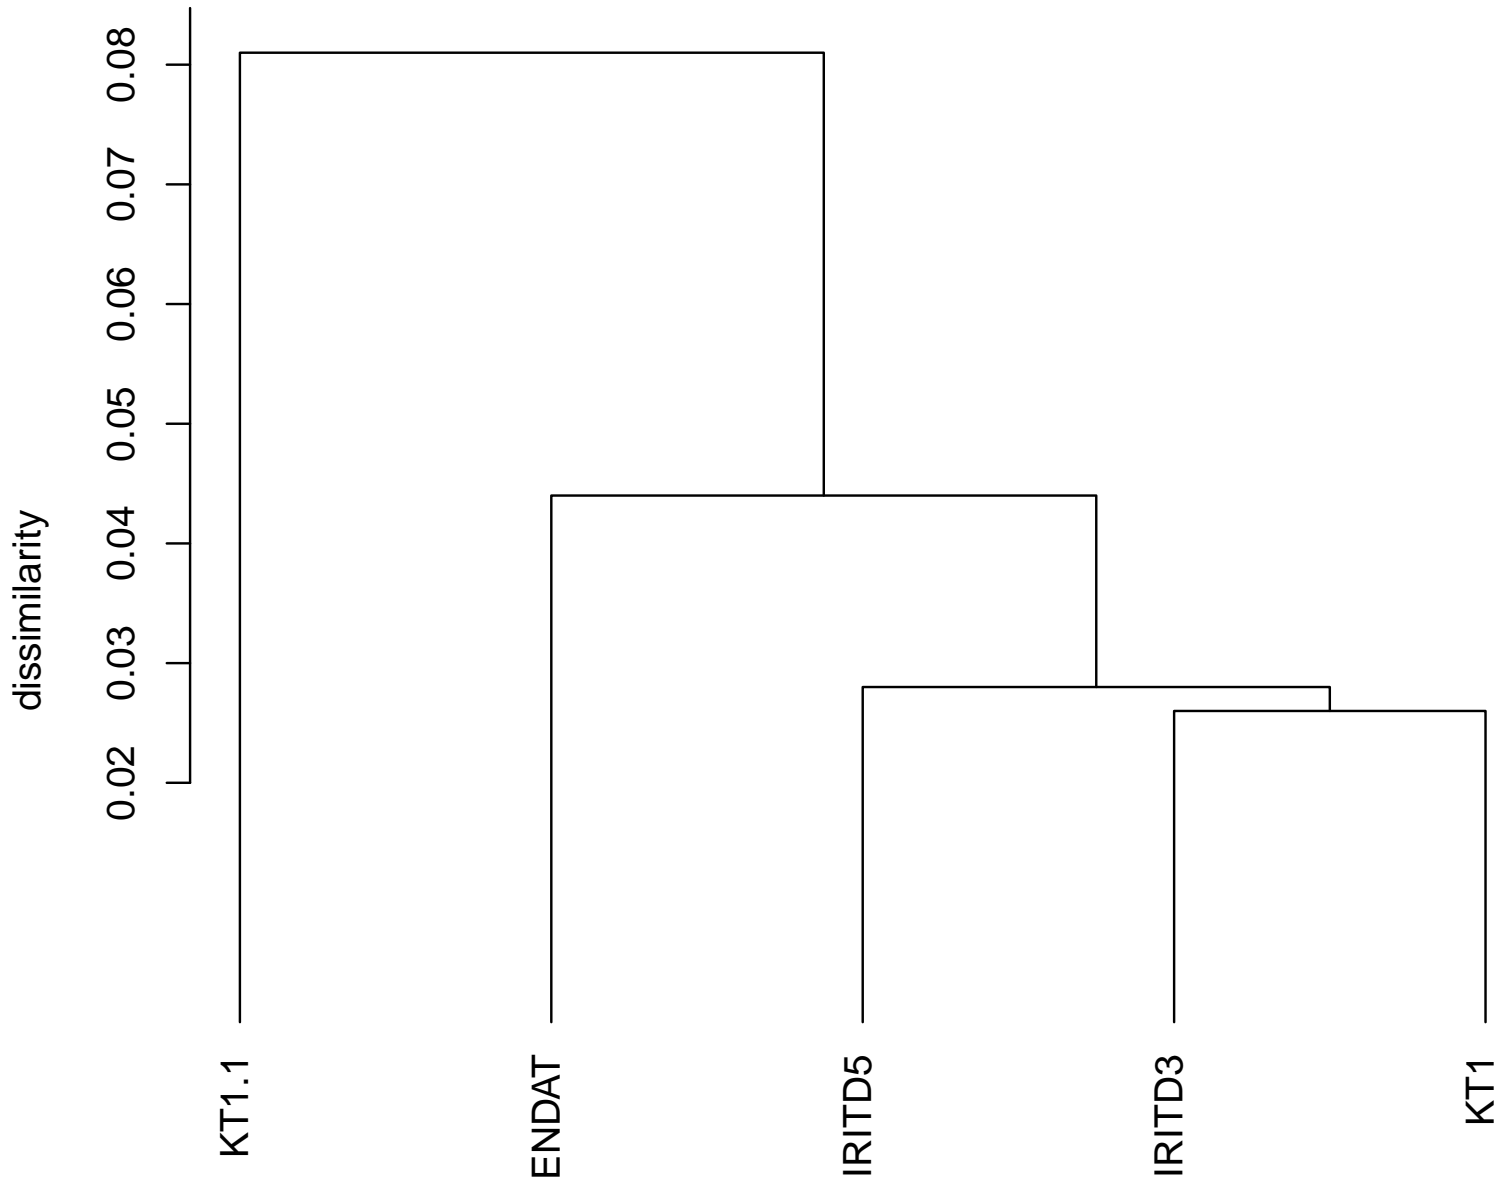

Dendrogram for Wang semantic similarity  
(method = complete)



# Kidney rejection gene lists. Resnik method, CC ontology

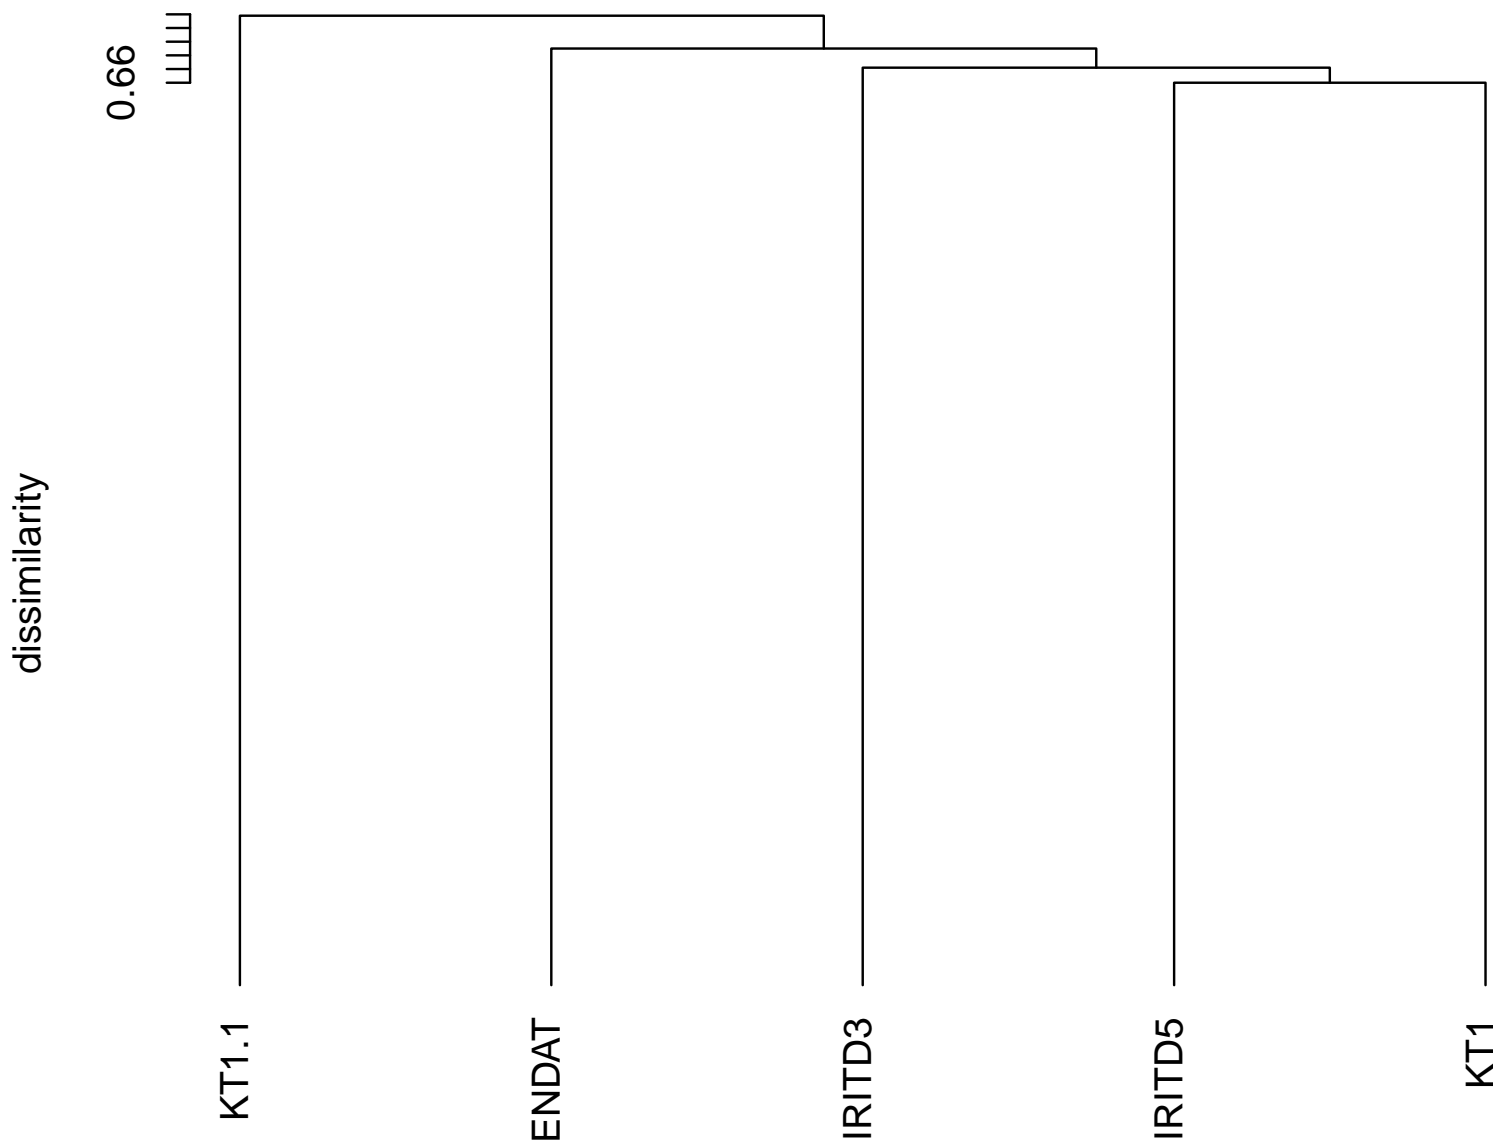

Dendrogram for Resnik semantic similarity  
(method = complete)

# Kidney rejection gene lists. Lin method, CC ontology

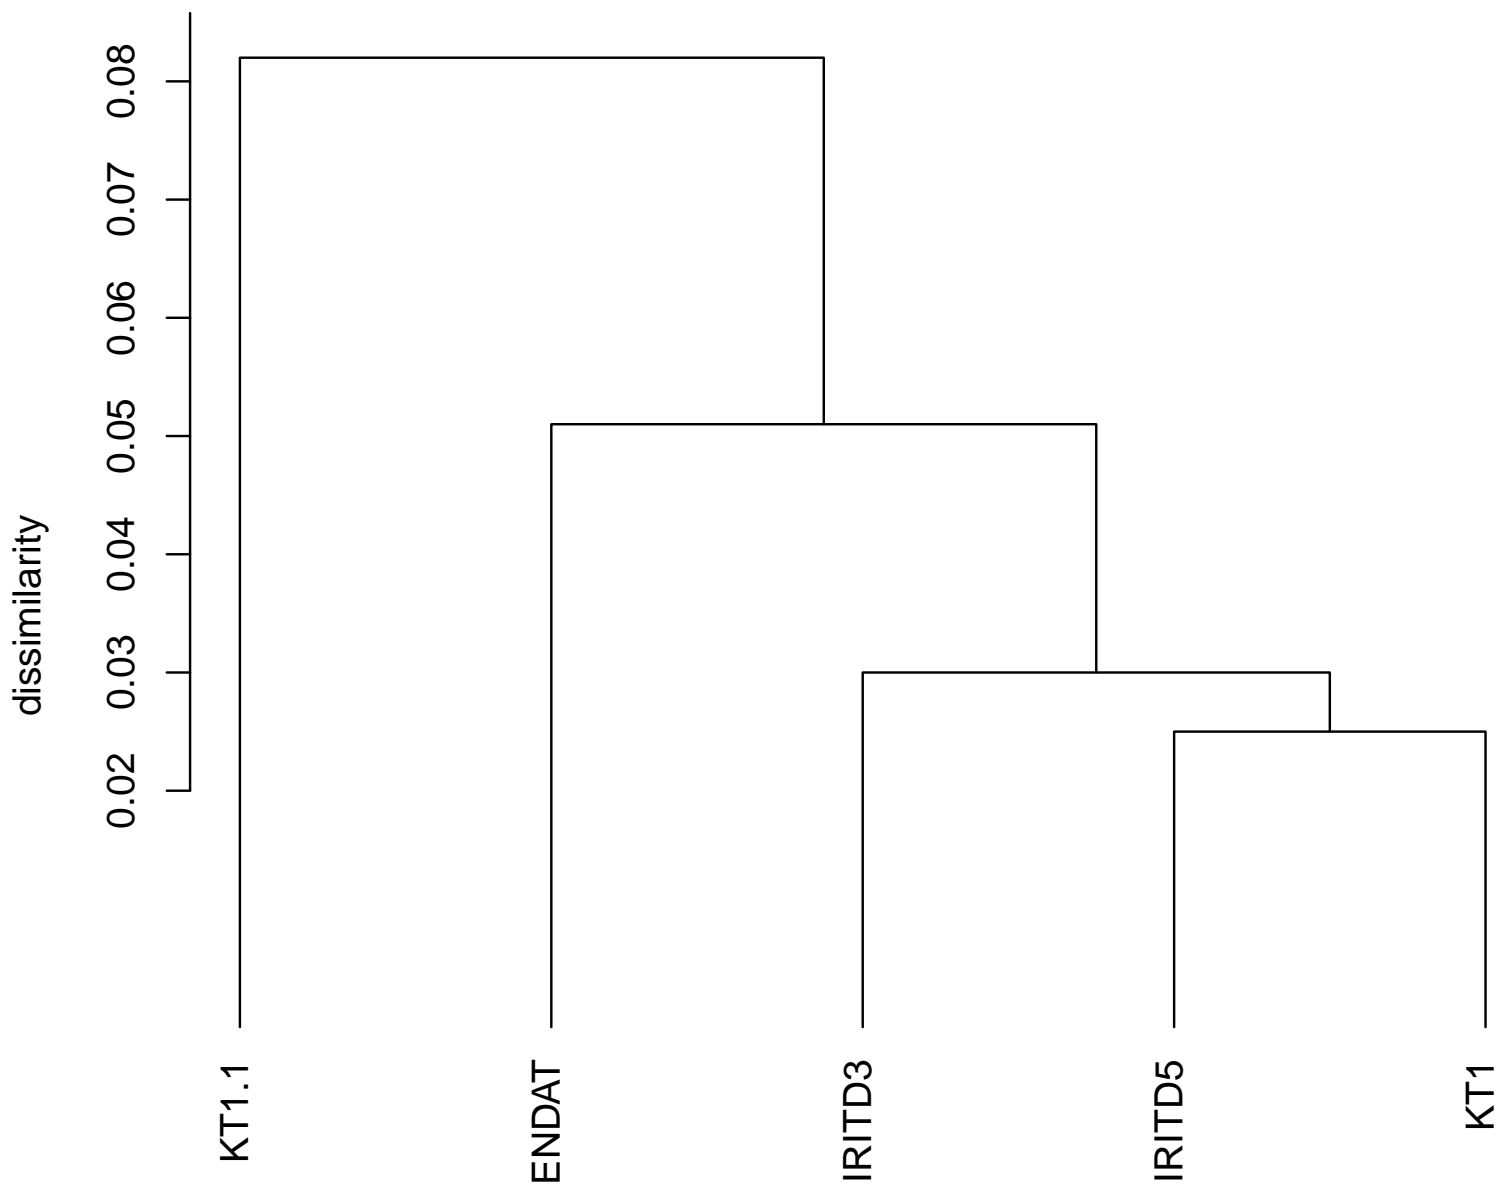

Dendrogram for Lin semantic similarity  
(method = complete)

# Kidney rejection gene lists. Jiang method, CC ontology

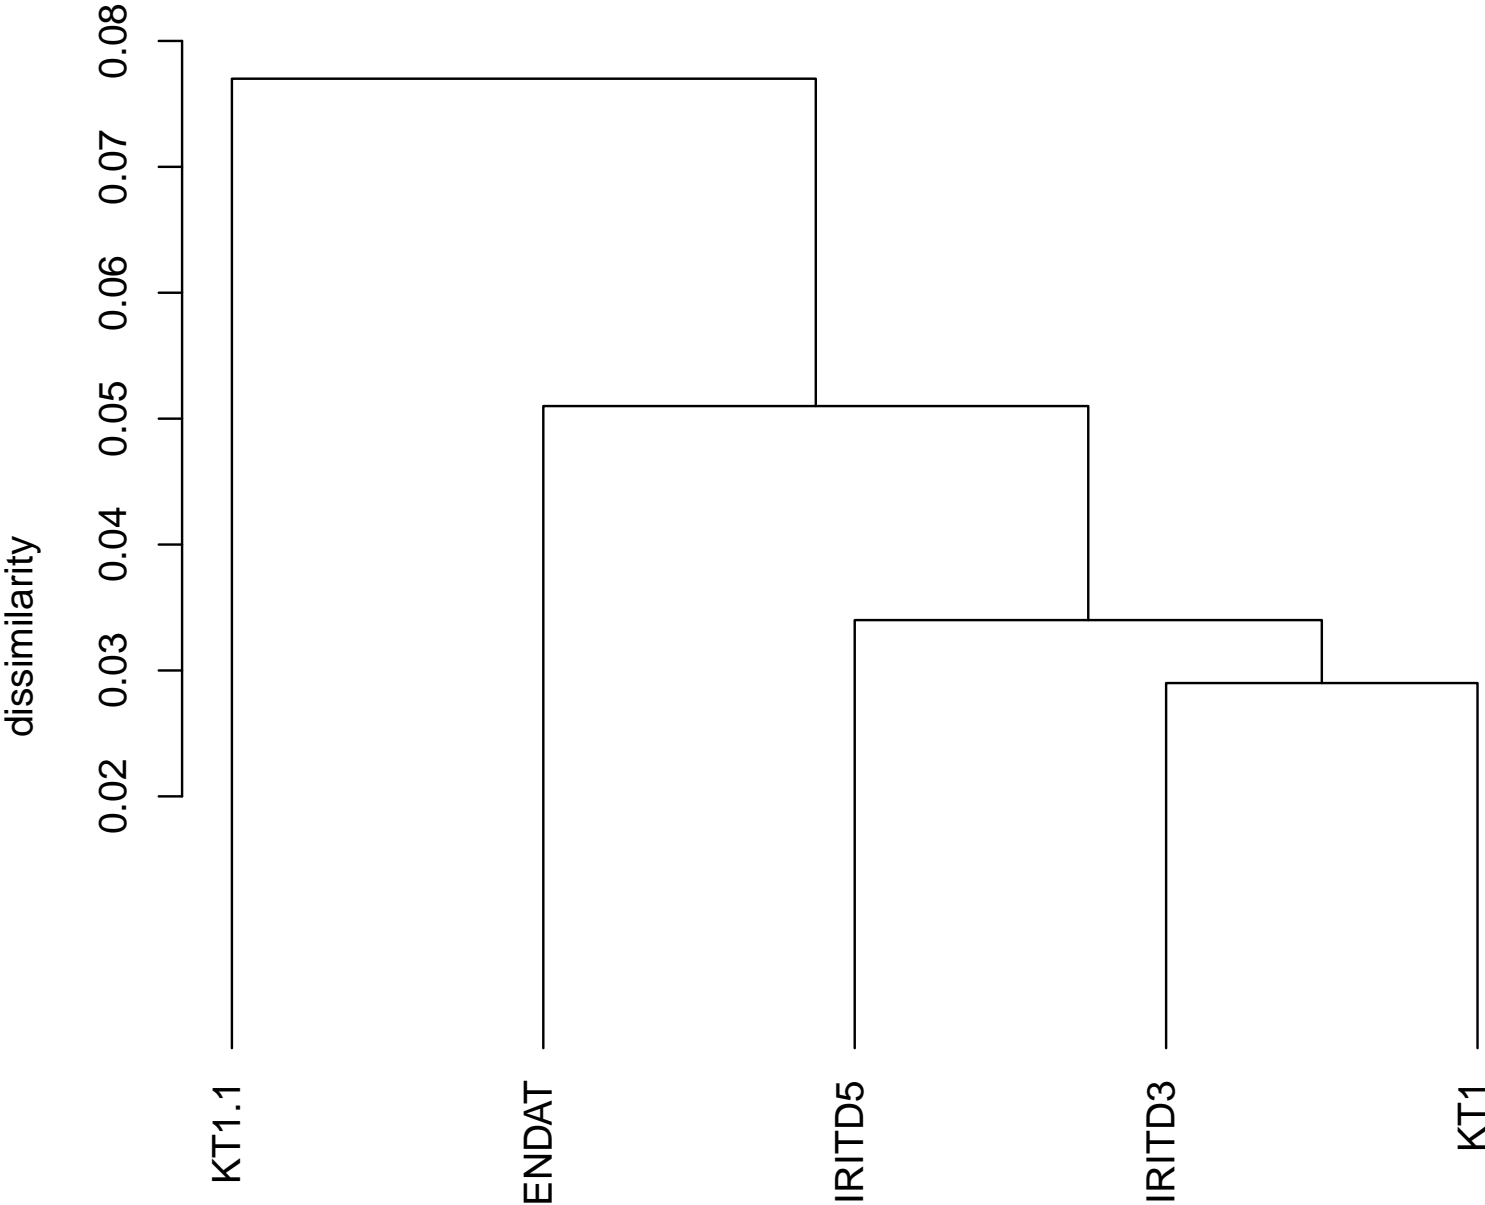

Dendrogram for Jiang semantic similarity (method = complete)

# Kidney rejection gene lists. Rel method, CC ontology

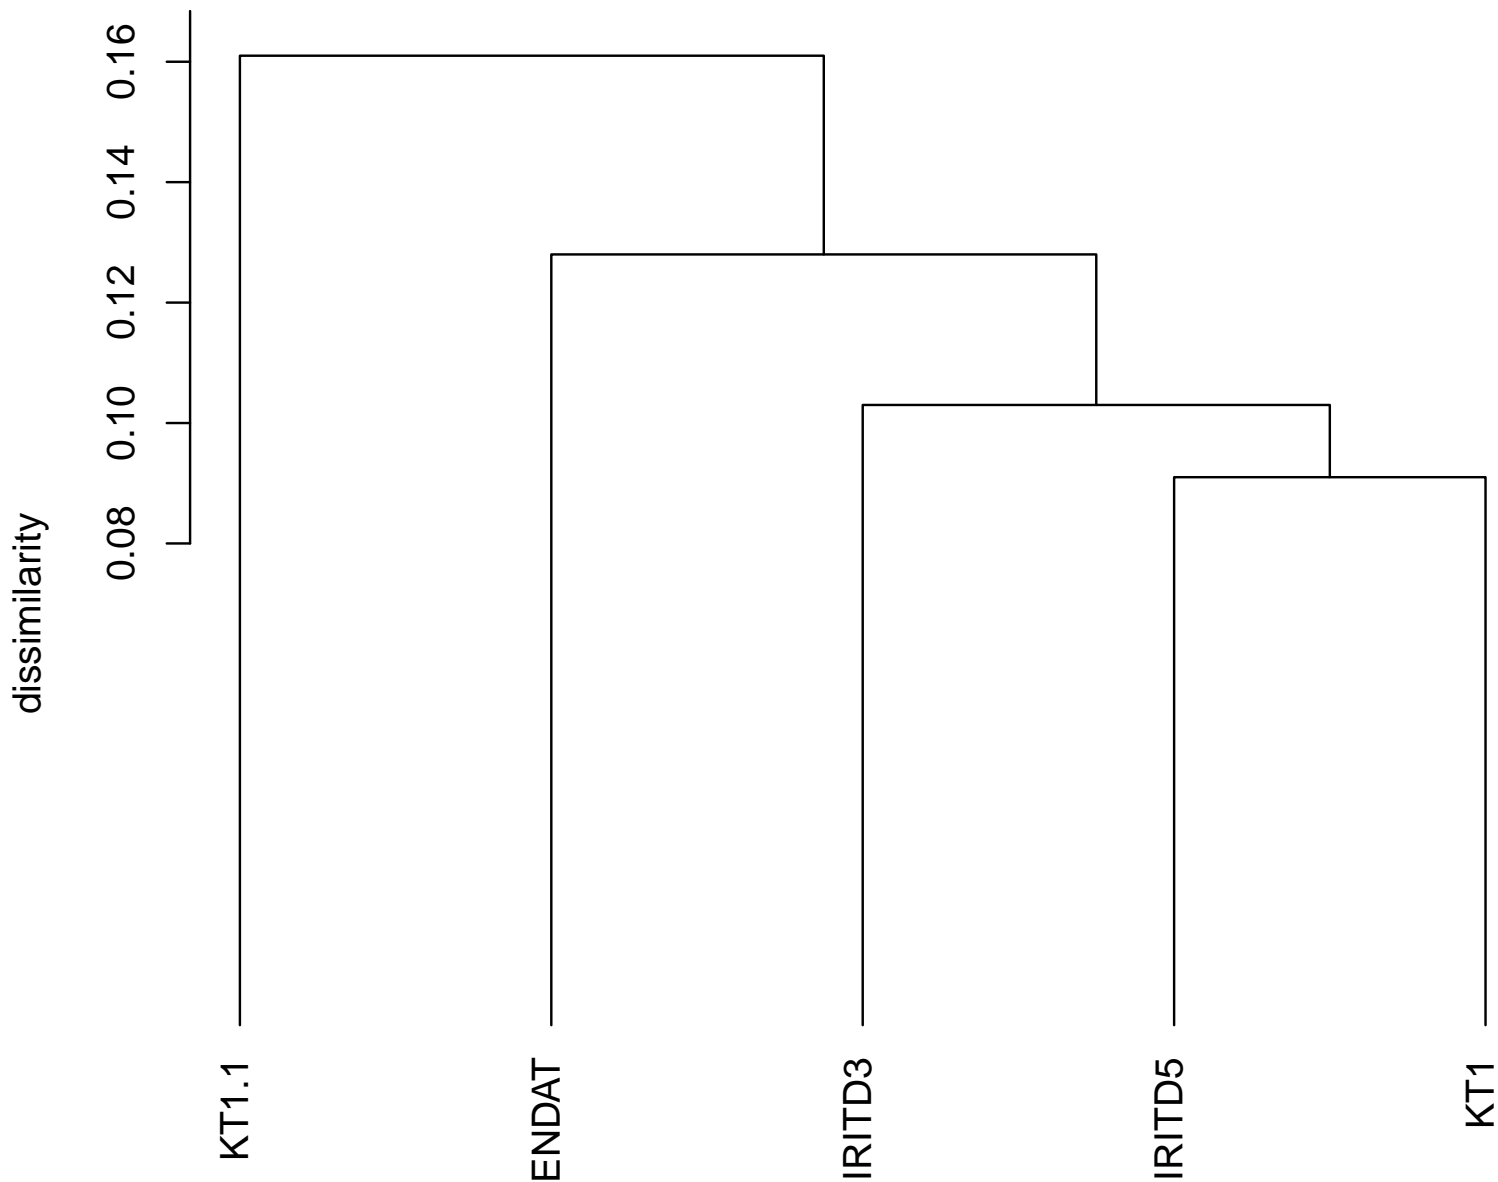

Dendrogram for Rel semantic similarity  
(method = complete)
